# Supplementary material for: Real-time observation of signal recognition particle binding to actively translating ribosomes
Source: eLife. 2014 Oct 30;3:e04418. doi: 10.7554/eLife.04418 (PMC4213662; doi:10.7554/eLife.04418)
Supplement: Figure 1—source data 1. — Source data for Figure 1 (including figure supplements). DOI: http://dx.doi.org/10.7554/eLife.04418.004 [file elife04418s001.xlsx]

## Sheet: Fig1
RAW	CDF			RAW	CDF
First Arrivals	First x_coord	First y_coord		Late Arrivals	Late x_coord	Late y_coord
206.1	12	0		69.1	0.2	0
205.7	12	0.0070922		2.9	0.2	0.0055096
80.4	17.5	0.014184		7.4	0.2	0.0082645
321.4	18.8	0.021277		58.7	0.3	0.011019
332.8	19.1	0.028369		11.1	0.3	0.016529
285.4	35.3	0.035461		4.3	0.4	0.027548
362.7	36.9	0.042553		2.2	0.4	0.035813
353.5	55.2	0.049645		9.1	0.4	0.038567
185.3	61.2	0.056738		21.7	0.5	0.055096
295.4	65.3	0.06383		18	0.6	0.057851
295.7	80.4	0.070922		2.5	0.6	0.060606
286.1	106.8	0.078014		44.9	0.6	0.07438
228.2	108.5	0.085106		2.3	0.7	0.077135
154	127.8	0.092199		1	0.7	0.088154
17.5	131.8	0.099291		7.3	0.7	0.096419
269.9	138.2	0.10638		0.7	0.8	0.10193
208.7	140	0.11348		72	0.8	0.10744
140	142.2	0.12057		1.2	0.9	0.11295
175.6	147.5	0.12766		21.1	0.9	0.1157
380.8	147.8	0.13475		1.9	0.9	0.12397
278.1	154	0.14184		4	1	0.13223
328	154.3	0.14894		3.4	1.1	0.13499
206.8	161	0.15603		6.8	1.1	0.13774
225.8	162	0.16312		6.7	1.1	0.1405
172	165.4	0.17021		10.3	1.2	0.14325
283.4	172	0.1773		6.2	1.2	0.15152
219.5	175.6	0.1844		2.5	1.3	0.15702
183.8	178.4	0.19858		2.8	1.3	0.16529
213.2	180.5	0.20567		19.4	1.3	0.16804
289.5	183.8	0.21277		22.5	1.4	0.17355
439.7	185.3	0.21986		29.9	1.4	0.17906
552	190.6	0.22695		2.8	1.4	0.18457
192.6	192.6	0.23404		4.5	1.5	0.19835
290.9	196.1	0.24113		3.8	1.6	0.20661
106.8	200.8	0.24823		3.4	1.7	0.20937
178.4	201.2	0.25532		1.8	1.7	0.21212
345.8	205.7	0.26241		0.4	1.8	0.21763
330.1	206.1	0.2695		1.5	1.8	0.22039
255.2	206.8	0.2766		4.9	1.8	0.2259
429.3	208.7	0.28369		0.7	1.9	0.2314
320.7	213.2	0.29078		3.2	1.9	0.23416
353.4	215.5	0.29787		1.2	2	0.23967
228.9	217.5	0.30496		9	2.1	0.24242
201.2	219.5	0.31206		11.5	2.1	0.24518
235	220.1	0.31915		4.6	2.2	0.25344
228.2	225.8	0.33333		5.9	2.3	0.2562
616.5	228.2	0.34752		17.8	2.3	0.26446
269.1	228.9	0.35461		35.3	2.4	0.26722
19.1	234	0.3617		13.3	2.5	0.28099
416.8	235	0.36879		6.7	2.6	0.28375
306.7	236.1	0.37589		2.6	2.6	0.28926
365.8	236.6	0.38298		2.4	2.7	0.29201
236.6	238	0.39007		3.1	2.7	0.29477
309	249.9	0.39716		0.4	2.8	0.30303
225.8	254	0.40426		2.5	2.8	0.30854
261.7	254.4	0.41135		15.3	2.9	0.31129
180.5	255.2	0.41844		8.3	2.9	0.31405
127.8	257.3	0.42553		2.1	3	0.32231
190.6	261.7	0.43262		5.7	3.1	0.32507
165.4	266.9	0.43972		0.6	3.1	0.32782
108.5	269.1	0.44681		7.5	3.1	0.33609
520	269.9	0.4539		24.7	3.2	0.34711
355.8	271.4	0.46099		10.9	3.2	0.34986
609.8	272.7	0.46809		9.8	3.4	0.35813
447.3	275.6	0.47518		0.9	3.4	0.36364
417.1	278.1	0.48227		25.1	3.4	0.36639
279.6	279.6	0.48936		3.7	3.5	0.36915
371.8	283.4	0.49645		3.8	3.5	0.37741
55.2	285.4	0.50355		5.3	3.6	0.38017
381.6	286.1	0.51064		3	3.6	0.38292
257.3	286.5	0.51773		9.9	3.7	0.38843
35.3	289.4	0.52482		8.3	3.7	0.39118
677.4	289.5	0.53191		0.7	3.7	0.39394
178.4	290.9	0.53901		1.3	3.8	0.4022
458	295.4	0.5461		0.2	3.9	0.40771
561.6	295.7	0.55319		3	4	0.41598
220.1	297.8	0.56028		12.2	4.1	0.41873
390.9	299.5	0.56738		12.6	4.2	0.42149
396	302	0.57447		1	4.2	0.42424
544.4	306.7	0.58865		3.6	4.3	0.42975
266.9	309	0.59574		2.8	4.4	0.43802
572.1	318.8	0.60284		16.9	4.4	0.44077
333.9	320.7	0.60993		21	4.5	0.44628
161	321.4	0.61702		3.7	4.6	0.45179
518.5	325.5	0.62411		1.8	4.6	0.46281
409.4	328	0.63121		37.2	4.7	0.46556
436	330.1	0.6383		0.5	4.8	0.47107
425.1	332.8	0.64539		7.2	4.8	0.47658
238	333.9	0.65248		4.6	4.9	0.47934
398.9	334	0.65957		30.1	4.9	0.48209
550.6	338.4	0.66667		41.6	5.2	0.48485
751	343.8	0.67376		17.7	5.3	0.49036
254.4	345.1	0.68085		0.6	5.4	0.49311
138.2	345.8	0.68794		39.6	5.4	0.49862
349	349	0.70213		0.5	5.5	0.50138
254	353.4	0.70922		13.9	5.6	0.50689
36.9	353.5	0.71631		8.9	5.6	0.51515
306.7	355.8	0.7234		3.6	5.7	0.51791
18.8	361.4	0.7305		5.2	5.7	0.52066
61.2	362.7	0.73759		45.3	5.7	0.52342
299.5	365.8	0.74468		0.5	5.8	0.52617
302	371.5	0.75177		3.8	5.8	0.52893
272.7	371.8	0.75887		0.3	5.9	0.53168
131.8	380.8	0.76596		6	5.9	0.53444
65.3	381.6	0.77305		0.9	5.9	0.53719
453.9	390.9	0.78014		8.9	6	0.5427
371.5	396	0.78723		4.4	6.1	0.54545
249.9	398	0.79433		27.3	6.1	0.54821
516.3	398.9	0.80142		21	6.2	0.55096
318.8	408.9	0.80851		1.6	6.2	0.55372
325.5	409.4	0.8156		10.2	6.3	0.55647
424.1	416.8	0.8227		4.2	6.4	0.55923
297.8	417.1	0.82979		4.8	6.6	0.56474
661.3	424.1	0.83688		16.7	6.7	0.56749
12	425.1	0.84397		9.7	6.7	0.57025
361.4	429.3	0.85106		3	6.8	0.573
286.5	436	0.85816		0.7	6.8	0.57576
236.1	439.7	0.86525		0.8	7.1	0.57851
398	447.3	0.87234		1.1	7.2	0.58127
215.5	453.9	0.87943		2.8	7.3	0.58402
217.5	458	0.88652		10	7.4	0.58953
200.8	516.3	0.89362		1.5	7.5	0.60055
343.8	518.5	0.90071		6.2	7.7	0.60331
534	520	0.9078		11.2	7.8	0.60606
142.2	534	0.91489		6.1	7.8	0.60882
408.9	544.4	0.92199		1.7	8	0.61157
338.4	550.6	0.92908		1.2	8.3	0.61708
196.1	552	0.93617		0.9	8.4	0.61983
147.8	561.6	0.94326		5.8	8.5	0.62259
271.4	572.1	0.95035		1.1	8.7	0.62534
349	573.3	0.95745		13.2	8.8	0.6281
573.3	609.8	0.96454		8.5	8.8	0.63085
682.3	616.5	0.97163		3.1	8.9	0.64187
289.4	661.3	0.97872		1.3	9	0.65014
154.3	677.4	0.98582		4.6	9.1	0.65565
345.1	682.3	0.99291		17.3	9.3	0.6584
234	751	1		24.6	9.6	0.66391
334				1.3	9.7	0.66667
147.5				4.6	9.8	0.66942
275.6				3.4	9.8	0.67218
162				20.6	9.9	0.67493
				6	10	0.67769
				1.4	10.1	0.68044
				1.6	10.2	0.6832
				119.2	10.2	0.68871
				13.2	10.3	0.69146
				24.1	10.3	0.69421
				5.6	10.6	0.69697
				5.6	10.7	0.69972
				0.4	10.9	0.70248
				1.4	11	0.70523
				13	11.1	0.70799
				2	11.1	0.71074
				3.1	11.2	0.7135
				3.7	11.5	0.71625
				5.4	11.7	0.71901
				5.4	12	0.72176
				0.6	12.2	0.72452
				7.7	12.6	0.72727
				8	13	0.73003
				30.9	13.2	0.73554
				9.3	13.3	0.73829
				47.1	13.5	0.74105
				0.5	13.7	0.7438
				10.1	13.9	0.74656
				18.4	14.2	0.74931
				16	14.8	0.75207
				0.3	15.3	0.75482
				4.4	15.6	0.75758
				2.6	15.9	0.76033
				17.1	16	0.76309
				0.6	16.1	0.76584
				8.9	16.5	0.7686
				5.3	16.7	0.77135
				1.8	16.9	0.7741
				3.9	16.9	0.77686
				17.5	17	0.77961
				1	17.1	0.78237
				0.4	17.3	0.78788
				8.8	17.5	0.79063
				9.6	17.7	0.79339
				3.5	17.8	0.79614
				40.6	18	0.7989
				25.8	18.4	0.80441
				0.4	18.7	0.80716
				3.7	18.8	0.80992
				34.2	19.4	0.81267
				24.3	20	0.81543
				2.5	20.5	0.81818
				8.7	20.6	0.82094
				4	20.7	0.82369
				5.6	21	0.8292
				9.6	21.1	0.83196
				9.1	21.7	0.83471
				54.9	22.1	0.83747
				39	22.5	0.84022
				10.2	22.6	0.84298
				11.7	23	0.84573
				5.8	23.3	0.84848
				2.1	23.5	0.85124
				5.7	24.1	0.85399
				7.5	24.3	0.85675
				4.6	24.6	0.8595
				4.8	24.6	0.86226
				1.8	24.7	0.86777
				18.7	24.9	0.87052
				25.3	24.9	0.87328
				3.4	25	0.87603
				2.7	25.1	0.87879
				36.7	25.3	0.88154
				0.7	25.8	0.8843
				7.8	27.1	0.88705
				3.1	27.2	0.88981
				4.7	27.3	0.89256
				12	28.7	0.89532
				6.4	28.8	0.89807
				9	29.9	0.90083
				5.6	30.1	0.90358
				36	30.9	0.90634
				15.9	32.1	0.90909
				263.9	33.1	0.91185
				33.8	33.4	0.9146
				16.5	33.8	0.91736
				2.2	34.2	0.92011
				2.8	34.8	0.92287
				14.2	35.3	0.92562
				2.5	35.4	0.92837
				3.1	35.5	0.93113
				5.4	36	0.93388
				13.5	36.7	0.93664
				59.1	37.2	0.93939
				3.2	39	0.94215
				103	39.6	0.9449
				28.7	40.6	0.94766
				28.8	41.6	0.95041
				0.8	42	0.95317
				24.9	44	0.95592
				2.6	44.9	0.95868
				32.1	45.3	0.96143
				5.9	47.1	0.96419
				7.1	54.9	0.96694
				5.9	55.6	0.9697
				1.8	58.7	0.97245
				1.5	59.1	0.97521
				18.8	59.7	0.97796
				2.7	69.1	0.98072
				2	72	0.98347
				4.1	74.9	0.98623
				1.5	103	0.98898
				24.7	119.2	0.99174
				5.7	225.2	0.99449
				1.9	263.9	0.99725
				1.3	341.3	1
				10.6
				0.8
				6.1
				0.4
				1.3
				7.5
				24.6
				341.3
				59.7
				11.1
				4
				0.7
				14.8
				0.9
				4.9
				20
				1.1
				0.3
				8.8
				6.8
				2.3
				5.6
				4.4
				9
				0.4
				4.4
				25
				18.4
				0.9
				7.4
				27.1
				1.5
				4.8
				2.3
				17.3
				0.2
				3.2
				23.3
				3.2
				3.9
				7.5
				16.1
				1.2
				4.2
				1.4
				0.6
				3.2
				225.2
				6.6
				35.5
				23.5
				35.4
				2.3
				0.6
				34.8
				33.4
				0.6
				27.2
				3.5
				16.9
				0.5
				13.7
				10.3
				7.8
				6.3
				8.4
				1.4
				22.1
				0.5
				4.6
				20.5
				23
				55.6
				1.4
				74.9
				44
				42
				1.7
				3.4
				3.4
				1.6
				0.2
				6.6
				24.9
				33.1
				2.2
				2.9
				0.4
				1.4
				0.9
				9.8
				3.5
				0.7
				20.7
				17
				10.2
				5.5
				4.3
				0.8
				0.7
				22.6
				1.3
				4.5
				10.7
				3.5
				11
				15.6
				8.9
				4.8
				1.9

## Sheet: Fig1s1_right_panel
FRET values		hist x_coord	hist y_coord (totals not shown)	hist y_coord normalized (shown)
0.5689		0.025	0	0
0.44441		0.075	0	0
0.32186		0.125	1	0.10753
0.59613		0.175	4	0.43011
0.48146		0.225	15	1.6129
0.50875		0.275	24	2.5806
0.52438		0.325	30	3.2258
0.27457		0.375	27	2.9032
0.2253		0.425	22	2.3656
0.31404		0.475	19	2.043
0.37738		0.525	10	1.0753
0.26981		0.575	15	1.6129
0.29514		0.625	7	0.75269
0.33492		0.675	6	0.64516
0.25339		0.725	2	0.21505
0.22868		0.775	3	0.32258
0.14496		0.825	0	0
0.37802		0.875	0	0
0.3012		0.925	0	0
0.34807		0.975	1	0.10753
0.42776
0.50374
0.35094
0.58513
0.62323
0.26861
0.69364
0.68366
0.68321
0.29082
0.32005
0.78879
0.55834
0.45622
0.31302
0.30382
0.2757
0.32454
0.27485
0.43547
0.33463
0.4498
0.38892
0.50484
0.24684
0.25878
0.43628
0.75003
0.38006
0.23326
0.28932
0.27226
0.39271
0.29471
0.34486
0.39416
0.34449
0.44284
0.35825
0.31256
0.25262
0.30298
0.40106
0.48764
0.47099
0.42009
0.37913
0.48035
0.36254
0.58235
0.56884
0.50048
0.29426
0.27255
0.27112
0.31616
0.22058
0.29224
0.44761
0.33433
0.25745
0.18961
0.7949
0.22088
0.37276
0.23524
0.32302
0.47023
0.44838
0.4118
0.69722
0.44704
0.28641
0.1989
0.20679
0.28554
0.58507
0.56076
0.4622
0.49727
0.25548
0.45658
0.44844
0.37245
0.30478
0.38601
0.40687
0.456
0.304
0.17977
0.22921
0.37472
0.24796
0.34891
0.36577
0.33671
0.34903
0.24991
0.58871
0.57166
0.52923
0.30705
0.38173
0.23374
0.61502
0.61905
0.32843
0.31238
0.30352
0.41766
0.39404
0.38237
0.3896
0.62929
0.32058
0.38624
0.45546
0.35626
0.44027
0.21378
0.44872
0.3444
0.39149
0.38757
0.5356
0.67744
0.41294
0.95111
0.16398
0.42325
0.46024
0.63821
0.45644
0.39569
0.26365
0.32885
0.25579
0.48866
0.57291
0.45304
0.56805
0.46789
0.52435
0.45512
0.33307
0.37316
0.64199
0.56921
0.20961
0.57102
0.22559
0.35524
0.54693
0.72417
0.36414
0.42722
0.47292
0.52623
0.71398
0.40012
0.64728
0.46396
0.43398
0.68587
0.26455
0.58209

## Sheet: Fig1s1_left_panel
FRET values		hist x_coord	hist y_coord (totals not shown)	hist y_coord normalized (shown)
0.37417		0.025	2	0.050826
0.42452		0.075	25	0.63532
0.20482		0.125	74	1.8806
0.18154		0.175	167	4.244
0.16155		0.225	157	3.9898
0.18672		0.275	125	3.1766
0.24458		0.325	122	3.1004
0.19937		0.375	60	1.5248
0.23021		0.425	32	0.81321
0.2271		0.475	17	0.43202
0.19944		0.525	3	0.076239
0.23258		0.575	2	0.050826
0.20901		0.625	0	0
0.24258		0.675	1	0.025413
0.26029		0.725	0	0
0.22557		0.775	0	0
0.2221		0.825	0	0
0.19362		0.875	0	0
0.20658		0.925	0	0
0.20522		0.975	0	0
0.17452
0.25875
0.21264
0.30309
0.19208
0.19734
0.1892
0.17019
0.22822
0.24956
0.22454
0.26393
0.27906
0.26157
0.2272
0.30614
0.15965
0.18867
0.18785
0.19523
0.13397
0.18331
0.19631
0.19413
0.15983
0.1355
0.11523
0.11965
0.1498
0.096309
0.1433
0.14372
0.19433
0.23889
0.20871
0.15122
0.20312
0.17846
0.21351
0.19045
0.18129
0.17242
0.15057
0.13354
0.1061
0.16454
0.15998
0.32803
0.31001
0.33569
0.27396
0.31404
0.25661
0.29428
0.29967
0.25296
0.27149
0.24709
0.27203
0.30329
0.26518
0.21805
0.22263
0.32242
0.25518
0.28361
0.28285
0.31961
0.3359
0.33596
0.24884
0.21455
0.24482
0.3139
0.15844
0.24403
0.31651
0.30503
0.27396
0.26989
0.29359
0.21097
0.30451
0.36526
0.23821
0.24279
0.19528
0.27686
0.21024
0.2772
0.13649
0.095698
0.2263
0.19315
0.1942
0.37856
0.14176
0.36886
0.13905
0.16534
0.3522
0.28082
0.33004
0.3099
0.28924
0.34051
0.40441
0.3743
0.36808
0.31848
0.19529
0.25287
0.34954
0.37326
0.32638
0.19284
0.26415
0.11135
0.29015
0.2148
0.24754
0.35195
0.23489
0.27554
0.27046
0.28182
0.19158
0.3001
0.42234
0.2853
0.30331
0.29353
0.29871
0.29107
0.33857
0.2868
0.30397
0.13242
0.11018
0.20912
0.39749
0.3903
0.33427
0.43552
0.44677
0.46307
0.1187
0.16432
0.061106
0.18483
0.067045
0.1843
0.082251
0.18993
0.17852
0.2098
0.14088
0.15905
0.11
0.15994
0.18676
0.21871
0.21649
0.1522
0.085572
0.15579
0.19396
0.21528
0.21361
0.17181
0.18712
0.18222
0.17911
0.1822
0.19677
0.21872
0.17961
0.15614
0.20293
0.19607
0.21628
0.19605
0.20053
0.11658
0.31411
0.22382
0.093518
0.18922
0.23459
0.25371
0.21071
0.062391
0.19707
0.16866
0.16761
0.31719
0.32073
0.42925
0.207
0.21232
0.25502
0.27291
0.44091
0.33319
0.42882
0.36507
0.32451
0.16412
0.26202
0.3393
0.41039
0.41151
0.48469
0.30704
0.42481
0.29549
0.22256
0.29549
0.15289
0.27928
0.19473
0.25639
0.49728
0.3105
0.1967
0.28975
0.28211
0.30972
0.3166
0.33441
0.26631
0.30899
0.34546
0.33267
0.34115
0.34776
0.36098
0.45665
0.14386
0.21266
0.15197
0.14182
0.2017
0.235
0.14913
0.18098
0.23592
0.18721
0.22265
0.11741
0.20503
0.17887
0.21703
0.20858
0.25001
0.19716
0.20003
0.16032
0.24424
0.081391
0.17451
0.051493
0.049638
0.14272
0.072117
0.17049
0.14836
0.31678
0.31894
0.25531
0.26869
0.28214
0.3359
0.18536
0.17439
0.22357
0.13994
0.2039
0.15082
0.17238
0.14069
0.22973
0.2509
0.24371
0.20091
0.22157
0.21451
0.3642
0.3486
0.43034
0.66573
0.37289
0.32576
0.26585
0.23692
0.33315
0.14614
0.29484
0.11774
0.21767
0.09616
0.067845
0.3265
0.3167
0.2813
0.31805
0.28392
0.29609
0.28773
0.16091
0.21187
0.20885
0.17524
0.1499
0.22026
0.20742
0.1503
0.17121
0.17231
0.15129
0.51129
0.33382
0.26571
0.29687
0.15441
0.10153
0.3225
0.28549
0.322
0.26293
0.35135
0.22526
0.31285
0.28433
0.30388
0.35386
0.3485
0.33277
0.22114
0.32226
0.39379
0.32451
0.29127
0.38828
0.36898
0.32555
0.30559
0.30617
0.32878
0.33192
0.22777
0.45562
0.32631
0.3353
0.31143
0.37875
0.55686
0.44564
0.41901
0.39561
0.29036
0.25714
0.2469
0.24599
0.2695
0.18788
0.28027
0.18042
0.26924
0.26748
0.48894
0.22155
0.20621
0.21865
0.21079
0.46779
0.38839
0.48454
0.18997
0.49936
0.32584
0.35621
0.31959
0.26876
0.30269
0.12987
0.11329
0.24614
0.27542
0.35403
0.29615
0.39547
0.32794
0.14632
0.18075
0.18239
0.1688
0.17883
0.16443
0.14322
0.15116
0.13763
0.15001
0.086656
0.048854
0.1002
0.114
0.12711
0.1626
0.14355
0.19703
0.2372
0.2036
0.17131
0.24807
0.15246
0.18412
0.18876
0.38036
0.40767
0.36348
0.31677
0.38346
0.3603
0.30041
0.19595
0.35525
0.47232
0.48174
0.48274
0.45942
0.46322
0.22183
0.1975
0.070974
0.22301
0.23317
0.23012
0.15276
0.19756
0.18759
0.40521
0.29153
0.25765
0.30132
0.25926
0.25374
0.25601
0.29899
0.30166
0.28869
0.2504
0.28571
0.28864
0.24226
0.23175
0.30073
0.33134
0.32222
0.31274
0.21461
0.23828
0.25482
0.16497
0.23099
0.19101
0.16387
0.16804
0.19121
0.20924
0.41033
0.26001
0.24831
0.35905
0.36148
0.4212
0.20615
0.21354
0.3026
0.27339
0.23526
0.24331
0.27425
0.24841
0.27252
0.27763
0.20821
0.23107
0.15193
0.22462
0.19505
0.27154
0.22456
0.30034
0.32193
0.25472
0.22857
0.22332
0.24526
0.12467
0.24363
0.21079
0.27137
0.29551
0.23267
0.24457
0.23861
0.27427
0.20691
0.34461
0.43436
0.43183
0.42895
0.27277
0.27658
0.32978
0.24893
0.2641
0.35966
0.30212
0.28046
0.39986
0.38084
0.32061
0.26288
0.36931
0.34475
0.38776
0.39325
0.34357
0.078592
0.17269
0.15209
0.12675
0.16573
0.10082
0.2767
0.18001
0.19568
0.24475
0.16358
0.19606
0.36631
0.23225
0.17105
0.12065
0.13187
0.083214
0.098265
0.1245
0.18984
0.15978
0.2044
0.18939
0.16074
0.1406
0.25471
0.12093
0.15831
0.11038
0.18787
0.20464
0.096193
0.093035
0.16771
0.097267
0.24544
0.17737
0.16593
0.153
0.18105
0.1819
0.18203
0.27378
0.14982
0.16198
0.098059
0.096786
0.17392
0.14166
0.14279
0.28372
0.40201
0.29661
0.33157
0.59191
0.35889
0.16571
0.29229
0.31651
0.31561
0.301
0.11494
0.16647
0.14054
0.16127
0.15737
0.10993
0.12922
0.17194
0.13327
0.10635
0.10692
0.15458
0.10966
0.16628
0.13274
0.16003
0.41727
0.2778
0.24621
0.2084
0.27651
0.17293
0.20423
0.34221
0.28995
0.31312
0.37947
0.29385
0.20972
0.12906
0.16466
0.36369
0.16508
0.17659
0.31112
0.26025
0.27895
0.47695
0.5344
0.41814
0.31479
0.32566
0.32293
0.3034
0.31759
0.36653
0.29701
0.32257
0.31163
0.31126
0.33911
0.085678
0.15978
0.16207
0.38681
0.37366
0.2119
0.27802
0.24353
0.241
0.12797
0.46097
0.19802
0.21305
0.20868
0.21329
0.20313
0.22407
0.23658
0.19337
0.25084
0.21374
0.2056
0.22867
0.19491
0.24138
0.30484
0.25749
0.30193
0.281
0.20368
0.36297
0.34066
0.32153
0.2439
0.26543
0.33203
0.35762
0.41016
0.36588
0.21078
0.23176
0.15968
0.18522
0.13779
0.12134
0.1857
0.22363
0.20706
0.202
0.20403
0.2082
0.18612
0.2053
0.18079
0.2037
0.24014
0.30258
0.31905
0.16854
0.24989
0.16205
0.42852
0.16784
0.26216
0.36388
0.22288
0.37022
0.26101
0.11913
0.29502
0.19904
0.31642
0.14005
0.16086
0.1899
0.39883
0.44965
0.40662
0.20506
0.41354
0.32658
0.36701
0.28756
0.19711
0.33968
0.35768
0.37117
0.16377
0.36307
0.28567
0.38151
0.31926
0.34321
0.39776
0.3423
0.33785
0.15521
0.38229
0.14762
0.064958
0.10502
0.10237
0.14436
0.12628
0.12211
0.10907
0.33652
0.1989
0.20876
0.54122
0.29104
0.33276
0.46982
0.28021
0.26188
0.35599
0.29863
0.40809
0.40458
0.4156
0.34533
0.26298
0.22244
0.21387

## Sheet: Fig1s3_top_panel
RNC arrivals
40.2	8.9	3.6	7.2	327.2	147.6	5.5	266.4	173.7	12.8	9.4	320.5	17.7	4.8	304	275.1	11.6	18.1	3.4	290.1	287.7	32.3	9.4	275.9	31.3	249	273.3	266.6	18.3	265	263.8	252.3	247.5	32.9	13	8.7	14.5	21.3	41.6	2.6	204.1	12.1	189.4	51.2	14	19.6	197.9	3.3	8.2	26.5
0.3	403.4	6.3	4.6	20.2	274.3	1.2	4.9	73.5	2.7	327.5	1	28.2	1.6	3.8	27.1	1.5	13.2	3.8	62.7	10.7	276.4	2.7	7.9	233.9	43.8	4.9	2.2	34.6	26.3	17.1	15.6	0.39999	11.1	49.4	25.6	18.4	5.1	19.3	8.9	1.3	220.2	31	1.2	37.6	0.6	74.9	0.8	1.4	1.3
12.8	15.9	38.2	5.5	134.8	58.8	3	48.1	11.9	327	20.5	48.4	5	292.8	1	24.8	0.8	7.8	81.1	2.8	12.3	1.2	269.2	8	33.8	6.3	0.40002	46.4	10.4	26.4	32.8	4	9.6	5	103.8	73.7	4.5	20.2	117.8	71.6	53.7	3.3	4	20.4	53.4	49.8	10	12.4	1.2	0.1
38.3	125.2	231.1	67.8	5	111.4	0.9	35	56.1	5.1	8.8	1.2	8.8	110.9	5.3	42.9	278.2	284.7	24.6	4.7	41.9	31.6	0.39999	47.5	5.8	11.7	1.7	0.89999	233.1	3.7	3.8	4.9	15.4	58.4	13.2	152.3	219.7	112.7	86.2	33.1	17.7	17.7	3.8	22.8	1.2	0.8	9.4	32.9	7.9	171.7
436.5	15.5	261.8	10	0.29999	55	0.8	17.3	6.3	1.3	8.8	19.2	274.8	14.8	48.2	88.1	82.9	60.7	24.4	14.3	18.9	40.9	10.4	5.3	0.40002	0.30002	14.9	3.8	97.3	33.1	2.2	26.6	1.4	0.40001	13.2	149.7	90.9	5.3	41.6	206.9	0.19998	19.9	22.9	171.5	14	113.7	14.8	20.4	23.2	110.2
59.5	4.2	83.3	5.6	0	39.3	9.3	184.5	25.5	23.7	0	1.9	164.8	21.3	0	84.2	15.1	8.3	267.7	21.7	2.6	7.1	67.2	0.70001	13.4	2.9	0	14.9	2.4	11.5	10.5	32.7	7.2	42.9	157.3	71.4	0.89999	61.5	111	33.4	2	0	82.3	0.30002	7.7	91.4	1.9	62.2	25.5	0.39999
3.6	5.2	38.8	56.9	0	19.9	5.9	46.7	21.8	1.5	0	3.8	0	31.4	0	12.5	2.1	17.9	81.9	2	18.8	15.6	41.9	12	11.6	36.7	0	0.5	36.1	2.2	3.2	4.1	79.8	15.6	151.1	3.8	0.89999	14	8.5	20.3	2.3	0	5.2	87.3	8	52.2	11.1	149	11.8	1.6
24.3	49.1	4	81.3	0	27.6	19.6	24.8	260.6	6	0	18.9	0	12	0	10.5	18.2	0.5	68.9	41.7	11.1	22.1	47.3	1.1	1.8	0.29999	0	3.7	88.8	2.2	3.8	7.7	9.5	24.1	61.4	32.7	2.6	10.4	114.7	0	0.80002	0	11.5	8.3	4.7	4.7	5.3	104.7	2	0.5
16.3	70.8	0	1	0	42.3	89.6	0	0.70001	6.3	0	9.3	0	24.6	0	6.2	8.4	7.7	28.3	2	4.2	6	0	2.7	107.5	0.1	0	28.2	0	1.6	1.8	10.8	3	110.3	7.6	2.5	5	3.8	19.2	0	10.4	0	67	47.1	11	137.7	8	0.80002	14.5	6.9
0	11.6	0	338.7	0	45.8	320.6	0	2.3	4.3	0	0	0	23.1	0	1.4	70.3	3.6	0.79999	0.29999	17.6	8.2	0	1.5	4.7	75.4	0	0.5	0	0.70001	0.19998	19.1	0.10001	2.7	7.1	63.3	0	23.9	6	0	6.3	0	1	56.3	9.1	5.7	0.39999	47.5	9.6	11.7
0	18.3	0	0	0	0.80005	36.8	0	53.1	0.5	0	0	0	15.5	0	13.9	26.9	2	4.1	0	3.9	5.7	0	3.4	91.5	0.20001	0	20.3	0	1.6	9.5	27	0.10001	7.7	14.9	1.3	0	17.4	3.2	0	6.4	0	2.6	1.7	11.6	12.1	2.3	17.2	3.7	18.8
0	105.9	0	0	0	11.1	13.7	0	26.2	0.90002	0	0	0	7.1	0	43.9	17.5	3	1.7	0	1.6	1.7	0	0	16.3	3.2	0	2.5	0	3.8	37.6	3.9	1.1	215.9	0.29999	7.5	0	192.3	44.5	0	4.3	0	0.59998	18.2	16.4	28.2	23.3	5.2	10.4	0.59998
0	4.3	0	0	0	17.3	30.8	0	0	6.8	0	0	0	0	0	3.8	33.3	52.4	21.7	0	13.4	1.8	0	0	0	2.5	0	15.1	0	1.7	0	6.6	5.2	15.9	0.099976	58.8	0	0	2.9	0	2.2	0	15.5	1.5	52.9	2.4	5	9.4	179.4	4.9
0	0	0	0	0	16.2	2.2	0	0	3.9	0	0	0	0	0	0	13.2	13	8.5	0	24.4	17.3	0	0	0	66.6	0	4.4	0	0.1	0	2.6	0.79999	5	26.6	0	0	0	15.8	0	14.4	0	1.5	2.1	13.7	17.7	0.5	12.7	87.5	2.1
0	0	0	0	0	0	6.6	0	0	18.6	0	0	0	0	0	0	2.4	5.2	7.9	0	6.6	23.4	0	0	0	5.1	0	2.6	0	0.10004	0	6.7	9.5	2.4	0	0	0	0	28.3	0	16	0	5.7	46.4	175.6	5.5	3.9	13.6	7	0
0	0	0	0	0	0	4.7	0	0	5.7	0	0	0	0	0	0	34	3.1	0.5	0	3.4	24.3	0	0	0	1.7	0	3.3	0	9	0	23.2	2.5	16.1	0	0	0	0	0	0	0.79999	0	1	1	63.8	2.7	0	39.9	7.5	0
0	0	0	0	0	0	3.6	0	0	4.6	0	0	0	0	0	0	1.5	19.3	0	0	17.3	1.1	0	0	0	33.1	0	9.4	0	21	0	2.3	2.4	3.9	0	0	0	0	0	0	6.2	0	4.1	23.5	64.6	3.2	0	13.1	28.8	0
0	0	0	0	0	0	8.7	0	0	3.2	0	0	0	0	0	0	12.1	7.1	0	0	0.90002	0	0	0	0	1.1	0	0.40002	0	13	0	1.4	41.2	7.9	0	0	0	0	0	0	1	0	1.1	1.7	10.7	6.5	0	24.3	0.89999	0
0	0	0	0	0	0	33.9	0	0	2.5	0	0	0	0	0	0	13.4	6.2	0	0	4	0	0	0	0	12.9	0	5.3	0	21.4	0	27	0.19995	0	0	0	0	0	0	0	7.5	0	9.2	0	42.3	31.7	0	2.9	2.4	0
0	0	0	0	0	0	9.1	0	0	1.9	0	0	0	0	0	0	3.8	0.89996	0	0	53.4	0	0	0	0	7.3	0	0	0	0	0	23.4	6	0	0	0	0	0	0	0	4.3	0	8.9	0	0	2.3	0	7.2	7.3	0
0	0	0	0	0	0	0	0	0	0.29999	0	0	0	0	0	0	0.5	12.7	0	0	8.2	0	0	0	0	0.29999	0	0	0	0	0	0.90002	1	0	0	0	0	0	0	0	21.6	0	1.7	0	0	0	0	26.8	10.1	0
0	0	0	0	0	0	0	0	0	23.4	0	0	0	0	0	0	0	6.1	0	0	1.1	0	0	0	0	0.19995	0	0	0	0	0	38.8	4.3	0	0	0	0	0	0	0	30.8	0	4.2	0	0	0	0	47.9	21.9	0
0	0	0	0	0	0	0	0	0	6.5	0	0	0	0	0	0	0	5.1	0	0	0	0	0	0	0	2.5	0	0	0	0	0	1.5	5.7	0	0	0	0	0	0	0	4.4	0	3.6	0	0	0	0	1	6.1	0
0	0	0	0	0	0	0	0	0	4.3	0	0	0	0	0	0	0	14.4	0	0	0	0	0	0	0	0.39996	0	0	0	0	0	21	0.20001	0	0	0	0	0	0	0	1.6	0	1.3	0	0	0	0	10.2	0.59998	0
0	0	0	0	0	0	0	0	0	10	0	0	0	0	0	0	0	8.6	0	0	0	0	0	0	0	2	0	0	0	0	0	5.6	0	0	0	0	0	0	0	0	4.1	0	8.1	0	0	0	0	6.9	3.4	0
0	0	0	0	0	0	0	0	0	5.3	0	0	0	0	0	0	0	10.9	0	0	0	0	0	0	0	3.5	0	0	0	0	0	17.7	0	0	0	0	0	0	0	0	11.1	0	4.3	0	0	0	0	20.4	5.8	0
0	0	0	0	0	0	0	0	0	5.7	0	0	0	0	0	0	0	11.2	0	0	0	0	0	0	0	13.3	0	0	0	0	0	5.3	0	0	0	0	0	0	0	0	0.20001	0	3.5	0	0	0	0	0	0.20001	0
0	0	0	0	0	0	0	0	0	2.8	0	0	0	0	0	0	0	28.3	0	0	0	0	0	0	0	1.5	0	0	0	0	0	1.1	0	0	0	0	0	0	0	0	41.5	0	10.1	0	0	0	0	0	5.3	0
0	0	0	0	0	0	0	0	0	25.2	0	0	0	0	0	0	0	10.7	0	0	0	0	0	0	0	3.3	0	0	0	0	0	7.9	0	0	0	0	0	0	0	0	7.9	0	0.90002	0	0	0	0	0	7.2	0
0	0	0	0	0	0	0	0	0	1.3	0	0	0	0	0	0	0	1.7	0	0	0	0	0	0	0	0	0	0	0	0	0	0.59998	0	0	0	0	0	0	0	0	1.1	0	2.3	0	0	0	0	0	0.40002	0
0	0	0	0	0	0	0	0	0	0.89996	0	0	0	0	0	0	0	8.9	0	0	0	0	0	0	0	0	0	0	0	0	0	2.8	0	0	0	0	0	0	0	0	6.8	0	3.2	0	0	0	0	0	0.20001	0
0	0	0	0	0	0	0	0	0	7.6	0	0	0	0	0	0	0	32.7	0	0	0	0	0	0	0	0	0	0	0	0	0	6.2	0	0	0	0	0	0	0	0	1.3	0	4.4	0	0	0	0	0	1.9	0
0	0	0	0	0	0	0	0	0	3.8	0	0	0	0	0	0	0	31.7	0	0	0	0	0	0	0	0	0	0	0	0	0	4.7	0	0	0	0	0	0	0	0	23.4	0	3.9	0	0	0	0	0	0.40002	0
0	0	0	0	0	0	0	0	0	5.2	0	0	0	0	0	0	0	6.1	0	0	0	0	0	0	0	0	0	0	0	0	0	4.6	0	0	0	0	0	0	0	0	3.3	0	0.39996	0	0	0	0	0	1.6	0
0	0	0	0	0	0	0	0	0	2	0	0	0	0	0	0	0	5	0	0	0	0	0	0	0	0	0	0	0	0	0	8	0	0	0	0	0	0	0	0	8	0	6.4	0	0	0	0	0	6	0
0	0	0	0	0	0	0	0	0	2.8	0	0	0	0	0	0	0	1.8	0	0	0	0	0	0	0	0	0	0	0	0	0	0.80005	0	0	0	0	0	0	0	0	2	0	4	0	0	0	0	0	0.20001	0
0	0	0	0	0	0	0	0	0	0.39996	0	0	0	0	0	0	0	9.5	0	0	0	0	0	0	0	0	0	0	0	0	0	5.4	0	0	0	0	0	0	0	0	0.5	0	11.1	0	0	0	0	0	0.5	0
0	0	0	0	0	0	0	0	0	5.8	0	0	0	0	0	0	0	39.1	0	0	0	0	0	0	0	0	0	0	0	0	0	3.5	0	0	0	0	0	0	0	0	10	0	9.7	0	0	0	0	0	23.4	0
0	0	0	0	0	0	0	0	0	2.9	0	0	0	0	0	0	0	7.2	0	0	0	0	0	0	0	0	0	0	0	0	0	0	0	0	0	0	0	0	0	0	3.1	0	2.4	0	0	0	0	0	1.5	0
0	0	0	0	0	0	0	0	0	3.1	0	0	0	0	0	0	0	21.6	0	0	0	0	0	0	0	0	0	0	0	0	0	0	0	0	0	0	0	0	0	0	3.4	0	7.8	0	0	0	0	0	8.7	0
0	0	0	0	0	0	0	0	0	5.1	0	0	0	0	0	0	0	0	0	0	0	0	0	0	0	0	0	0	0	0	0	0	0	0	0	0	0	0	0	0	7.2	0	5	0	0	0	0	0	0.20001	0
0	0	0	0	0	0	0	0	0	4	0	0	0	0	0	0	0	0	0	0	0	0	0	0	0	0	0	0	0	0	0	0	0	0	0	0	0	0	0	0	45.1	0	1.2	0	0	0	0	0	0.39996	0
0	0	0	0	0	0	0	0	0	6	0	0	0	0	0	0	0	0	0	0	0	0	0	0	0	0	0	0	0	0	0	0	0	0	0	0	0	0	0	0	2.4	0	1.5	0	0	0	0	0	15.6	0
0	0	0	0	0	0	0	0	0	10	0	0	0	0	0	0	0	0	0	0	0	0	0	0	0	0	0	0	0	0	0	0	0	0	0	0	0	0	0	0	0	0	1	0	0	0	0	0	1.7	0
0	0	0	0	0	0	0	0	0	4.8	0	0	0	0	0	0	0	0	0	0	0	0	0	0	0	0	0	0	0	0	0	0	0	0	0	0	0	0	0	0	0	0	1.7	0	0	0	0	0	3	0
0	0	0	0	0	0	0	0	0	0.60004	0	0	0	0	0	0	0	0	0	0	0	0	0	0	0	0	0	0	0	0	0	0	0	0	0	0	0	0	0	0	0	0	2.1	0	0	0	0	0	9.1	0
0	0	0	0	0	0	0	0	0	1.5	0	0	0	0	0	0	0	0	0	0	0	0	0	0	0	0	0	0	0	0	0	0	0	0	0	0	0	0	0	0	0	0	9.1	0	0	0	0	0	0	0
0	0	0	0	0	0	0	0	0	7.9	0	0	0	0	0	0	0	0	0	0	0	0	0	0	0	0	0	0	0	0	0	0	0	0	0	0	0	0	0	0	0	0	1.8	0	0	0	0	0	0	0
0	0	0	0	0	0	0	0	0	0.40002	0	0	0	0	0	0	0	0	0	0	0	0	0	0	0	0	0	0	0	0	0	0	0	0	0	0	0	0	0	0	0	0	5.8	0	0	0	0	0	0	0
0	0	0	0	0	0	0	0	0	1.8	0	0	0	0	0	0	0	0	0	0	0	0	0	0	0	0	0	0	0	0	0	0	0	0	0	0	0	0	0	0	0	0	13.1	0	0	0	0	0	0	0
0	0	0	0	0	0	0	0	0	5.2	0	0	0	0	0	0	0	0	0	0	0	0	0	0	0	0	0	0	0	0	0	0	0	0	0	0	0	0	0	0	0	0	1.1	0	0	0	0	0	0	0
0	0	0	0	0	0	0	0	0	4.5	0	0	0	0	0	0	0	0	0	0	0	0	0	0	0	0	0	0	0	0	0	0	0	0	0	0	0	0	0	0	0	0	10.7	0	0	0	0	0	0	0
0	0	0	0	0	0	0	0	0	20.1	0	0	0	0	0	0	0	0	0	0	0	0	0	0	0	0	0	0	0	0	0	0	0	0	0	0	0	0	0	0	0	0	1.2	0	0	0	0	0	0	0
0	0	0	0	0	0	0	0	0	1.2	0	0	0	0	0	0	0	0	0	0	0	0	0	0	0	0	0	0	0	0	0	0	0	0	0	0	0	0	0	0	0	0	3.6	0	0	0	0	0	0	0
0	0	0	0	0	0	0	0	0	16.2	0	0	0	0	0	0	0	0	0	0	0	0	0	0	0	0	0	0	0	0	0	0	0	0	0	0	0	0	0	0	0	0	1.2	0	0	0	0	0	0	0
0	0	0	0	0	0	0	0	0	7.5	0	0	0	0	0	0	0	0	0	0	0	0	0	0	0	0	0	0	0	0	0	0	0	0	0	0	0	0	0	0	0	0	6.6	0	0	0	0	0	0	0
0	0	0	0	0	0	0	0	0	1.1	0	0	0	0	0	0	0	0	0	0	0	0	0	0	0	0	0	0	0	0	0	0	0	0	0	0	0	0	0	0	0	0	2.4	0	0	0	0	0	0	0
0	0	0	0	0	0	0	0	0	2.9	0	0	0	0	0	0	0	0	0	0	0	0	0	0	0	0	0	0	0	0	0	0	0	0	0	0	0	0	0	0	0	0	3	0	0	0	0	0	0	0
0	0	0	0	0	0	0	0	0	6.4	0	0	0	0	0	0	0	0	0	0	0	0	0	0	0	0	0	0	0	0	0	0	0	0	0	0	0	0	0	0	0	0	0.39996	0	0	0	0	0	0	0
0	0	0	0	0	0	0	0	0	0	0	0	0	0	0	0	0	0	0	0	0	0	0	0	0	0	0	0	0	0	0	0	0	0	0	0	0	0	0	0	0	0	8.8	0	0	0	0	0	0	0
0	0	0	0	0	0	0	0	0	0	0	0	0	0	0	0	0	0	0	0	0	0	0	0	0	0	0	0	0	0	0	0	0	0	0	0	0	0	0	0	0	0	1.7	0	0	0	0	0	0	0
0	0	0	0	0	0	0	0	0	0	0	0	0	0	0	0	0	0	0	0	0	0	0	0	0	0	0	0	0	0	0	0	0	0	0	0	0	0	0	0	0	0	4.2	0	0	0	0	0	0	0
0	0	0	0	0	0	0	0	0	0	0	0	0	0	0	0	0	0	0	0	0	0	0	0	0	0	0	0	0	0	0	0	0	0	0	0	0	0	0	0	0	0	13	0	0	0	0	0	0	0
0	0	0	0	0	0	0	0	0	0	0	0	0	0	0	0	0	0	0	0	0	0	0	0	0	0	0	0	0	0	0	0	0	0	0	0	0	0	0	0	0	0	0.5	0	0	0	0	0	0	0
0	0	0	0	0	0	0	0	0	0	0	0	0	0	0	0	0	0	0	0	0	0	0	0	0	0	0	0	0	0	0	0	0	0	0	0	0	0	0	0	0	0	0.29999	0	0	0	0	0	0	0
0	0	0	0	0	0	0	0	0	0	0	0	0	0	0	0	0	0	0	0	0	0	0	0	0	0	0	0	0	0	0	0	0	0	0	0	0	0	0	0	0	0	8.7	0	0	0	0	0	0	0
0	0	0	0	0	0	0	0	0	0	0	0	0	0	0	0	0	0	0	0	0	0	0	0	0	0	0	0	0	0	0	0	0	0	0	0	0	0	0	0	0	0	8.9	0	0	0	0	0	0	0
0	0	0	0	0	0	0	0	0	0	0	0	0	0	0	0	0	0	0	0	0	0	0	0	0	0	0	0	0	0	0	0	0	0	0	0	0	0	0	0	0	0	0.29999	0	0	0	0	0	0	0
0	0	0	0	0	0	0	0	0	0	0	0	0	0	0	0	0	0	0	0	0	0	0	0	0	0	0	0	0	0	0	0	0	0	0	0	0	0	0	0	0	0	1	0	0	0	0	0	0	0
0	0	0	0	0	0	0	0	0	0	0	0	0	0	0	0	0	0	0	0	0	0	0	0	0	0	0	0	0	0	0	0	0	0	0	0	0	0	0	0	0	0	0.60004	0	0	0	0	0	0	0
0	0	0	0	0	0	0	0	0	0	0	0	0	0	0	0	0	0	0	0	0	0	0	0	0	0	0	0	0	0	0	0	0	0	0	0	0	0	0	0	0	0	3.9	0	0	0	0	0	0	0
0	0	0	0	0	0	0	0	0	0	0	0	0	0	0	0	0	0	0	0	0	0	0	0	0	0	0	0	0	0	0	0	0	0	0	0	0	0	0	0	0	0	1.8	0	0	0	0	0	0	0
0	0	0	0	0	0	0	0	0	0	0	0	0	0	0	0	0	0	0	0	0	0	0	0	0	0	0	0	0	0	0	0	0	0	0	0	0	0	0	0	0	0	2.3	0	0	0	0	0	0	0
0	0	0	0	0	0	0	0	0	0	0	0	0	0	0	0	0	0	0	0	0	0	0	0	0	0	0	0	0	0	0	0	0	0	0	0	0	0	0	0	0	0	2.4	0	0	0	0	0	0	0
0	0	0	0	0	0	0	0	0	0	0	0	0	0	0	0	0	0	0	0	0	0	0	0	0	0	0	0	0	0	0	0	0	0	0	0	0	0	0	0	0	0	4.1	0	0	0	0	0	0	0
0	0	0	0	0	0	0	0	0	0	0	0	0	0	0	0	0	0	0	0	0	0	0	0	0	0	0	0	0	0	0	0	0	0	0	0	0	0	0	0	0	0	0.30005	0	0	0	0	0	0	0
0	0	0	0	0	0	0	0	0	0	0	0	0	0	0	0	0	0	0	0	0	0	0	0	0	0	0	0	0	0	0	0	0	0	0	0	0	0	0	0	0	0	3	0	0	0	0	0	0	0
0	0	0	0	0	0	0	0	0	0	0	0	0	0	0	0	0	0	0	0	0	0	0	0	0	0	0	0	0	0	0	0	0	0	0	0	0	0	0	0	0	0	0.89996	0	0	0	0	0	0	0
0	0	0	0	0	0	0	0	0	0	0	0	0	0	0	0	0	0	0	0	0	0	0	0	0	0	0	0	0	0	0	0	0	0	0	0	0	0	0	0	0	0	0	0	0	0	0	0	0	0
0	0	0	0	0	0	0	0	0	0	0	0	0	0	0	0	0	0	0	0	0	0	0	0	0	0	0	0	0	0	0	0	0	0	0	0	0	0	0	0	0	0	0	0	0	0	0	0	0	0
0	0	0	0	0	0	0	0	0	0	0	0	0	0	0	0	0	0	0	0	0	0	0	0	0	0	0	0	0	0	0	0	0	0	0	0	0	0	0	0	0	0	0	0	0	0	0	0	0	0
0	0	0	0	0	0	0	0	0	0	0	0	0	0	0	0	0	0	0	0	0	0	0	0	0	0	0	0	0	0	0	0	0	0	0	0	0	0	0	0	0	0	0	0	0	0	0	0	0	0
0	0	0	0	0	0	0	0	0	0	0	0	0	0	0	0	0	0	0	0	0	0	0	0	0	0	0	0	0	0	0	0	0	0	0	0	0	0	0	0	0	0	0	0	0	0	0	0	0	0
0	0	0	0	0	0	0	0	0	0	0	0	0	0	0	0	0	0	0	0	0	0	0	0	0	0	0	0	0	0	0	0	0	0	0	0	0	0	0	0	0	0	0	0	0	0	0	0	0	0
0	0	0	0	0	0	0	0	0	0	0	0	0	0	0	0	0	0	0	0	0	0	0	0	0	0	0	0	0	0	0	0	0	0	0	0	0	0	0	0	0	0	0	0	0	0	0	0	0	0
0	0	0	0	0	0	0	0	0	0	0	0	0	0	0	0	0	0	0	0	0	0	0	0	0	0	0	0	0	0	0	0	0	0	0	0	0	0	0	0	0	0	0	0	0	0	0	0	0	0
0	0	0	0	0	0	0	0	0	0	0	0	0	0	0	0	0	0	0	0	0	0	0	0	0	0	0	0	0	0	0	0	0	0	0	0	0	0	0	0	0	0	0	0	0	0	0	0	0	0
0	0	0	0	0	0	0	0	0	0	0	0	0	0	0	0	0	0	0	0	0	0	0	0	0	0	0	0	0	0	0	0	0	0	0	0	0	0	0	0	0	0	0	0	0	0	0	0	0	0
0	0	0	0	0	0	0	0	0	0	0	0	0	0	0	0	0	0	0	0	0	0	0	0	0	0	0	0	0	0	0	0	0	0	0	0	0	0	0	0	0	0	0	0	0	0	0	0	0	0
0	0	0	0	0	0	0	0	0	0	0	0	0	0	0	0	0	0	0	0	0	0	0	0	0	0	0	0	0	0	0	0	0	0	0	0	0	0	0	0	0	0	0	0	0	0	0	0	0	0
0	0	0	0	0	0	0	0	0	0	0	0	0	0	0	0	0	0	0	0	0	0	0	0	0	0	0	0	0	0	0	0	0	0	0	0	0	0	0	0	0	0	0	0	0	0	0	0	0	0
0	0	0	0	0	0	0	0	0	0	0	0	0	0	0	0	0	0	0	0	0	0	0	0	0	0	0	0	0	0	0	0	0	0	0	0	0	0	0	0	0	0	0	0	0	0	0	0	0	0
0	0	0	0	0	0	0	0	0	0	0	0	0	0	0	0	0	0	0	0	0	0	0	0	0	0	0	0	0	0	0	0	0	0	0	0	0	0	0	0	0	0	0	0	0	0	0	0	0	0
0	0	0	0	0	0	0	0	0	0	0	0	0	0	0	0	0	0	0	0	0	0	0	0	0	0	0	0	0	0	0	0	0	0	0	0	0	0	0	0	0	0	0	0	0	0	0	0	0	0
0	0	0	0	0	0	0	0	0	0	0	0	0	0	0	0	0	0	0	0	0	0	0	0	0	0	0	0	0	0	0	0	0	0	0	0	0	0	0	0	0	0	0	0	0	0	0	0	0	0
0	0	0	0	0	0	0	0	0	0	0	0	0	0	0	0	0	0	0	0	0	0	0	0	0	0	0	0	0	0	0	0	0	0	0	0	0	0	0	0	0	0	0	0	0	0	0	0	0	0
0	0	0	0	0	0	0	0	0	0	0	0	0	0	0	0	0	0	0	0	0	0	0	0	0	0	0	0	0	0	0	0	0	0	0	0	0	0	0	0	0	0	0	0	0	0	0	0	0	0
0	0	0	0	0	0	0	0	0	0	0	0	0	0	0	0	0	0	0	0	0	0	0	0	0	0	0	0	0	0	0	0	0	0	0	0	0	0	0	0	0	0	0	0	0	0	0	0	0	0
0	0	0	0	0	0	0	0	0	0	0	0	0	0	0	0	0	0	0	0	0	0	0	0	0	0	0	0	0	0	0	0	0	0	0	0	0	0	0	0	0	0	0	0	0	0	0	0	0	0
0	0	0	0	0	0	0	0	0	0	0	0	0	0	0	0	0	0	0	0	0	0	0	0	0	0	0	0	0	0	0	0	0	0	0	0	0	0	0	0	0	0	0	0	0	0	0	0	0	0
0	0	0	0	0	0	0	0	0	0	0	0	0	0	0	0	0	0	0	0	0	0	0	0	0	0	0	0	0	0	0	0	0	0	0	0	0	0	0	0	0	0	0	0	0	0	0	0	0	0
0	0	0	0	0	0	0	0	0	0	0	0	0	0	0	0	0	0	0	0	0	0	0	0	0	0	0	0	0	0	0	0	0	0	0	0	0	0	0	0	0	0	0	0	0	0	0	0	0	0
0	0	0	0	0	0	0	0	0	0	0	0	0	0	0	0	0	0	0	0	0	0	0	0	0	0	0	0	0	0	0	0	0	0	0	0	0	0	0	0	0	0	0	0	0	0	0	0	0	0
0	0	0	0	0	0	0	0	0	0	0	0	0	0	0	0	0	0	0	0	0	0	0	0	0	0	0	0	0	0	0	0	0	0	0	0	0	0	0	0	0	0	0	0	0	0	0	0	0	0
0	0	0	0	0	0	0	0	0	0	0	0	0	0	0	0	0	0	0	0	0	0	0	0	0	0	0	0	0	0	0	0	0	0	0	0	0	0	0	0	0	0	0	0	0	0	0	0	0	0
0	0	0	0	0	0	0	0	0	0	0	0	0	0	0	0	0	0	0	0	0	0	0	0	0	0	0	0	0	0	0	0	0	0	0	0	0	0	0	0	0	0	0	0	0	0	0	0	0	0
0	0	0	0	0	0	0	0	0	0	0	0	0	0	0	0	0	0	0	0	0	0	0	0	0	0	0	0	0	0	0	0	0	0	0	0	0	0	0	0	0	0	0	0	0	0	0	0	0	0
0	0	0	0	0	0	0	0	0	0	0	0	0	0	0	0	0	0	0	0	0	0	0	0	0	0	0	0	0	0	0	0	0	0	0	0	0	0	0	0	0	0	0	0	0	0	0	0	0	0
0	0	0	0	0	0	0	0	0	0	0	0	0	0	0	0	0	0	0	0	0	0	0	0	0	0	0	0	0	0	0	0	0	0	0	0	0	0	0	0	0	0	0	0	0	0	0	0	0	0
0	0	0	0	0	0	0	0	0	0	0	0	0	0	0	0	0	0	0	0	0	0	0	0	0	0	0	0	0	0	0	0	0	0	0	0	0	0	0	0	0	0	0	0	0	0	0	0	0	0
0	0	0	0	0	0	0	0	0	0	0	0	0	0	0	0	0	0	0	0	0	0	0	0	0	0	0	0	0	0	0	0	0	0	0	0	0	0	0	0	0	0	0	0	0	0	0	0	0	0
0	0	0	0	0	0	0	0	0	0	0	0	0	0	0	0	0	0	0	0	0	0	0	0	0	0	0	0	0	0	0	0	0	0	0	0	0	0	0	0	0	0	0	0	0	0	0	0	0	0
0	0	0	0	0	0	0	0	0	0	0	0	0	0	0	0	0	0	0	0	0	0	0	0	0	0	0	0	0	0	0	0	0	0	0	0	0	0	0	0	0	0	0	0	0	0	0	0	0	0
0	0	0	0	0	0	0	0	0	0	0	0	0	0	0	0	0	0	0	0	0	0	0	0	0	0	0	0	0	0	0	0	0	0	0	0	0	0	0	0	0	0	0	0	0	0	0	0	0	0
0	0	0	0	0	0	0	0	0	0	0	0	0	0	0	0	0	0	0	0	0	0	0	0	0	0	0	0	0	0	0	0	0	0	0	0	0	0	0	0	0	0	0	0	0	0	0	0	0	0
0	0	0	0	0	0	0	0	0	0	0	0	0	0	0	0	0	0	0	0	0	0	0	0	0	0	0	0	0	0	0	0	0	0	0	0	0	0	0	0	0	0	0	0	0	0	0	0	0	0
0	0	0	0	0	0	0	0	0	0	0	0	0	0	0	0	0	0	0	0	0	0	0	0	0	0	0	0	0	0	0	0	0	0	0	0	0	0	0	0	0	0	0	0	0	0	0	0	0	0
0	0	0	0	0	0	0	0	0	0	0	0	0	0	0	0	0	0	0	0	0	0	0	0	0	0	0	0	0	0	0	0	0	0	0	0	0	0	0	0	0	0	0	0	0	0	0	0	0	0
0	0	0	0	0	0	0	0	0	0	0	0	0	0	0	0	0	0	0	0	0	0	0	0	0	0	0	0	0	0	0	0	0	0	0	0	0	0	0	0	0	0	0	0	0	0	0	0	0	0
0	0	0	0	0	0	0	0	0	0	0	0	0	0	0	0	0	0	0	0	0	0	0	0	0	0	0	0	0	0	0	0	0	0	0	0	0	0	0	0	0	0	0	0	0	0	0	0	0	0
0	0	0	0	0	0	0	0	0	0	0	0	0	0	0	0	0	0	0	0	0	0	0	0	0	0	0	0	0	0	0	0	0	0	0	0	0	0	0	0	0	0	0	0	0	0	0	0	0	0
0	0	0	0	0	0	0	0	0	0	0	0	0	0	0	0	0	0	0	0	0	0	0	0	0	0	0	0	0	0	0	0	0	0	0	0	0	0	0	0	0	0	0	0	0	0	0	0	0	0
0	0	0	0	0	0	0	0	0	0	0	0	0	0	0	0	0	0	0	0	0	0	0	0	0	0	0	0	0	0	0	0	0	0	0	0	0	0	0	0	0	0	0	0	0	0	0	0	0	0
0	0	0	0	0	0	0	0	0	0	0	0	0	0	0	0	0	0	0	0	0	0	0	0	0	0	0	0	0	0	0	0	0	0	0	0	0	0	0	0	0	0	0	0	0	0	0	0	0	0
0	0	0	0	0	0	0	0	0	0	0	0	0	0	0	0	0	0	0	0	0	0	0	0	0	0	0	0	0	0	0	0	0	0	0	0	0	0	0	0	0	0	0	0	0	0	0	0	0	0
0	0	0	0	0	0	0	0	0	0	0	0	0	0	0	0	0	0	0	0	0	0	0	0	0	0	0	0	0	0	0	0	0	0	0	0	0	0	0	0	0	0	0	0	0	0	0	0	0	0
0	0	0	0	0	0	0	0	0	0	0	0	0	0	0	0	0	0	0	0	0	0	0	0	0	0	0	0	0	0	0	0	0	0	0	0	0	0	0	0	0	0	0	0	0	0	0	0	0	0
0	0	0	0	0	0	0	0	0	0	0	0	0	0	0	0	0	0	0	0	0	0	0	0	0	0	0	0	0	0	0	0	0	0	0	0	0	0	0	0	0	0	0	0	0	0	0	0	0	0
0	0	0	0	0	0	0	0	0	0	0	0	0	0	0	0	0	0	0	0	0	0	0	0	0	0	0	0	0	0	0	0	0	0	0	0	0	0	0	0	0	0	0	0	0	0	0	0	0	0
0	0	0	0	0	0	0	0	0	0	0	0	0	0	0	0	0	0	0	0	0	0	0	0	0	0	0	0	0	0	0	0	0	0	0	0	0	0	0	0	0	0	0	0	0	0	0	0	0	0
0	0	0	0	0	0	0	0	0	0	0	0	0	0	0	0	0	0	0	0	0	0	0	0	0	0	0	0	0	0	0	0	0	0	0	0	0	0	0	0	0	0	0	0	0	0	0	0	0	0
0	0	0	0	0	0	0	0	0	0	0	0	0	0	0	0	0	0	0	0	0	0	0	0	0	0	0	0	0	0	0	0	0	0	0	0	0	0	0	0	0	0	0	0	0	0	0	0	0	0
0	0	0	0	0	0	0	0	0	0	0	0	0	0	0	0	0	0	0	0	0	0	0	0	0	0	0	0	0	0	0	0	0	0	0	0	0	0	0	0	0	0	0	0	0	0	0	0	0	0
0	0	0	0	0	0	0	0	0	0	0	0	0	0	0	0	0	0	0	0	0	0	0	0	0	0	0	0	0	0	0	0	0	0	0	0	0	0	0	0	0	0	0	0	0	0	0	0	0	0
0	0	0	0	0	0	0	0	0	0	0	0	0	0	0	0	0	0	0	0	0	0	0	0	0	0	0	0	0	0	0	0	0	0	0	0	0	0	0	0	0	0	0	0	0	0	0	0	0	0
0	0	0	0	0	0	0	0	0	0	0	0	0	0	0	0	0	0	0	0	0	0	0	0	0	0	0	0	0	0	0	0	0	0	0	0	0	0	0	0	0	0	0	0	0	0	0	0	0	0
0	0	0	0	0	0	0	0	0	0	0	0	0	0	0	0	0	0	0	0	0	0	0	0	0	0	0	0	0	0	0	0	0	0	0	0	0	0	0	0	0	0	0	0	0	0	0	0	0	0
0	0	0	0	0	0	0	0	0	0	0	0	0	0	0	0	0	0	0	0	0	0	0	0	0	0	0	0	0	0	0	0	0	0	0	0	0	0	0	0	0	0	0	0	0	0	0	0	0	0
0	0	0	0	0	0	0	0	0	0	0	0	0	0	0	0	0	0	0	0	0	0	0	0	0	0	0	0	0	0	0	0	0	0	0	0	0	0	0	0	0	0	0	0	0	0	0	0	0	0
0	0	0	0	0	0	0	0	0	0	0	0	0	0	0	0	0	0	0	0	0	0	0	0	0	0	0	0	0	0	0	0	0	0	0	0	0	0	0	0	0	0	0	0	0	0	0	0	0	0
0	0	0	0	0	0	0	0	0	0	0	0	0	0	0	0	0	0	0	0	0	0	0	0	0	0	0	0	0	0	0	0	0	0	0	0	0	0	0	0	0	0	0	0	0	0	0	0	0	0
0	0	0	0	0	0	0	0	0	0	0	0	0	0	0	0	0	0	0	0	0	0	0	0	0	0	0	0	0	0	0	0	0	0	0	0	0	0	0	0	0	0	0	0	0	0	0	0	0	0
0	0	0	0	0	0	0	0	0	0	0	0	0	0	0	0	0	0	0	0	0	0	0	0	0	0	0	0	0	0	0	0	0	0	0	0	0	0	0	0	0	0	0	0	0	0	0	0	0	0
0	0	0	0	0	0	0	0	0	0	0	0	0	0	0	0	0	0	0	0	0	0	0	0	0	0	0	0	0	0	0	0	0	0	0	0	0	0	0	0	0	0	0	0	0	0	0	0	0	0
0	0	0	0	0	0	0	0	0	0	0	0	0	0	0	0	0	0	0	0	0	0	0	0	0	0	0	0	0	0	0	0	0	0	0	0	0	0	0	0	0	0	0	0	0	0	0	0	0	0
0	0	0	0	0	0	0	0	0	0	0	0	0	0	0	0	0	0	0	0	0	0	0	0	0	0	0	0	0	0	0	0	0	0	0	0	0	0	0	0	0	0	0	0	0	0	0	0	0	0
0	0	0	0	0	0	0	0	0	0	0	0	0	0	0	0	0	0	0	0	0	0	0	0	0	0	0	0	0	0	0	0	0	0	0	0	0	0	0	0	0	0	0	0	0	0	0	0	0	0
0	0	0	0	0	0	0	0	0	0	0	0	0	0	0	0	0	0	0	0	0	0	0	0	0	0	0	0	0	0	0	0	0	0	0	0	0	0	0	0	0	0	0	0	0	0	0	0	0	0
0	0	0	0	0	0	0	0	0	0	0	0	0	0	0	0	0	0	0	0	0	0	0	0	0	0	0	0	0	0	0	0	0	0	0	0	0	0	0	0	0	0	0	0	0	0	0	0	0	0
0	0	0	0	0	0	0	0	0	0	0	0	0	0	0	0	0	0	0	0	0	0	0	0	0	0	0	0	0	0	0	0	0	0	0	0	0	0	0	0	0	0	0	0	0	0	0	0	0	0
0	0	0	0	0	0	0	0	0	0	0	0	0	0	0	0	0	0	0	0	0	0	0	0	0	0	0	0	0	0	0	0	0	0	0	0	0	0	0	0	0	0	0	0	0	0	0	0	0	0
0	0	0	0	0	0	0	0	0	0	0	0	0	0	0	0	0	0	0	0	0	0	0	0	0	0	0	0	0	0	0	0	0	0	0	0	0	0	0	0	0	0	0	0	0	0	0	0	0	0
0	0	0	0	0	0	0	0	0	0	0	0	0	0	0	0	0	0	0	0	0	0	0	0	0	0	0	0	0	0	0	0	0	0	0	0	0	0	0	0	0	0	0	0	0	0	0	0	0	0
0	0	0	0	0	0	0	0	0	0	0	0	0	0	0	0	0	0	0	0	0	0	0	0	0	0	0	0	0	0	0	0	0	0	0	0	0	0	0	0	0	0	0	0	0	0	0	0	0	0
0	0	0	0	0	0	0	0	0	0	0	0	0	0	0	0	0	0	0	0	0	0	0	0	0	0	0	0	0	0	0	0	0	0	0	0	0	0	0	0	0	0	0	0	0	0	0	0	0	0
0	0	0	0	0	0	0	0	0	0	0	0	0	0	0	0	0	0	0	0	0	0	0	0	0	0	0	0	0	0	0	0	0	0	0	0	0	0	0	0	0	0	0	0	0	0	0	0	0	0
0	0	0	0	0	0	0	0	0	0	0	0	0	0	0	0	0	0	0	0	0	0	0	0	0	0	0	0	0	0	0	0	0	0	0	0	0	0	0	0	0	0	0	0	0	0	0	0	0	0
variances
1254.1	1241.5	827.46	815.8	795.84	758.98	723.71	699.73	693.76	693.03	686.05	671.47	655.75	636.48	602.22	600	584.15	583.69	575.81	572.41	564.22	517.79	512.18	499.01	483.71	480.45	476.84	473.7	467.36	466.53	459.42	441.8	440.45	414.37	408.17	402.41	361.02	346.51	329.26	318.84	317.9	313.33	306.23	301.82	301.23	295.14	289.25	286.22	271.57	269.78
medians
24.3	15.9	38.5	8.6	20.2	40.8	7.65	40.85	25.85	4.5	9.4	9.3	22.95	18.4	5.3	24.8	13.2	8.75	15.1	9.5	10.9	15.6	26.15	5.3	14.85	3.2	4.9	3.8	35.35	3.8	6.65	5.9	3.65	13.35	14.05	32.7	5	18.8	28.3	33.1	4.4	17.7	3.6	19.3	14	9.3	8	13.35	5.9	3.5
[truncated: 112 more columns]

## Sheet: Fig1s3_bottom_panel
RNC residence-times
16.9	41.5	22.6	0.1	26.3	14.4	3.3	46	71.1	4.1	37.6	2.4	10.9	15.6	0.5	137	85.4	109	18.3	0.1	0.8	130.2	12.6	11.3	2.6	141.1	2	6.4	3.8	58	1.4	6.1	7.8	24.4	4.8	8.6	0.4	1.6	0.3	0.79999	0.9	4.5	1.1	31.4	56.5	49.4	2.9	1.5	102.6	0.8
20.9	51.6	5.4	3.1	58.7	1.8	18	2.3	5.6	7.5	29	131.5	79.7	33.2	22.2	8.6	3.8	10	4.5	77.4	3.4	35.1	149.4	2.2	0.5	10.8	2.7	18.4	0.39999	19.4	59.6	65.3	126.8	14.3	1.3	3.8	9.4	6.7	3	2.3	1.1	3.3	87.8	1.9	13.4	4.9	7.6	12.5	11.8	5.1
10.3	39	3.6	4.8	214	29.4	37.5	1.5	10.3	4.8	18	6.1	15.9	11	6.4	6	9.8	0.40001	1.9	29.7	149.4	6.5	6.7	7.7	2.6	11.1	5	138.1	29.4	6.7	15.7	2	23.1	1.4	6.3	122.9	34.1	7.1	115.8	13.8	1.5	109.7	6.5	6.4	2.6	2.6	105.4	5.1	1.7	8.3
13.4	9.6	13.4	19.5	190.9	279.6	2.7	10.1	6	4.1	2.3	11.9	2.2	0.2	17.7	11.2	0.60001	1.2	16.8	16	16.4	8.3	2.3	6.6	2.4	18.4	0.6	6.9	8	3.7	16.1	18.4	6.6	3.2	9.4	0.29999	4.9	3.1	9.2	4.7	4.1	0.8	3.7	22.5	5.8	94.7	4.3	33.5	3.2	2.7
15.4	18	1	4.5	15.3	74.2	33	1.1	14.1	2.7	1.1	14.6	3.9	2.7	11.1	0.2	33.9	8.6	50.9	5.9	11.2	8.4	0.39999	6.9	0.70001	8	0.60001	0.60001	26.8	9	3.8	2.7	8.5	37.8	9.6	0.3	0.7	1.7	9.6	7.9	1.8	16.9	9.2	3.4	8.5	8.3	9.8	0.1	18.8	3.4
11.5	15.3	5.4	0.60001	0	0	19.4	32.2	7.1	5.3	6.7	17.6	10	2.4	2	4.1	0.39999	10.5	113.1	5	8.2	3.6	1.4	2.7	6.4	0	1.9	13	21.6	5.8	8	3	3.3	1.3	22.8	1.2	2.3	60.3	4.2	1.5	6.8	4	1.1	4.9	0.5	18.7	0.3	71.3	15.7	1
2.2	0.5	3.7	10.4	0	0	237.9	17.6	2.2	7.5	30.5	5.1	8.2	23.5	33.6	5.7	1.8	2.4	81.6	1.5	16.4	22.6	0	148.9	6	0	2.1	15.8	0.29999	1.8	2	5.3	0	2.1	9.7	2.2	6.3	3.3	7.4	11.6	1.3	4	14.4	2.5	6.3	0	1.7	10.8	0.5	18
21.2	6.1	333.7	7.3	0	0	11.4	6.3	1	1.8	42.8	7.1	5.5	4.2	64.7	91	22.9	4.6	44.9	0.29999	9.4	2.7	0	0	1.4	0	2.4	0.90002	7.6	15.2	5.1	9.4	0	0.10001	8.4	3.1	17.8	34.6	0	0.29999	3.2	10.2	2.9	6.3	6.9	0	9	19.3	7	5.2
487.6	3.8	24	10.9	0	0	55.9	8.9	1.5	2.6	6.7	10.1	11.4	170.9	158	0	2.6	3.4	0	1.5	4.5	68.7	0	0	8.1	0	4.7	0	23.4	6.3	12.4	3.8	0	94.5	13	7.1	5.9	6.3	0	5.6	1.6	0	1.9	16.7	6.7	0	4	12.3	13.8	59.6
0	4.3	0	23.2	0	0	0	5.6	11.4	32.6	47.1	6.2	6.3	0	0	0	22.5	2.3	0	11.1	8.6	0	0	0	135.7	0	36.4	0	13.2	18	74.8	5.2	0	7.2	1	3.4	6.8	8.6	0	30.2	0.8	0	23.2	68.5	0.5	0	16.2	44.5	0	9.4
0	0.29999	0	0.1	0	0	0	44.6	5.9	27.5	168.4	4.2	7.2	0	0	0	27	93.4	0	29.3	7.1	0	0	0	62	0	1.3	0	0.20001	22.1	7.5	37.5	0	24.1	0.2	0.39999	6.9	98.4	0	27.6	0.79999	0	25.4	6.2	2.1	0	4.2	49.8	0	0.1
0	19.1	0	11.8	0	0	0	177.4	0.59998	61	26.5	2.3	6.4	0	0	0	4.8	64.5	0	127.7	22.5	0	0	0	10.3	0	7.3	0	41.8	61.7	12.8	102.5	0	13.9	1.5	1.9	2.6	0	0	65.4	0.2	0	15.5	11	5.4	0	5.7	21.7	0	0.60001
0	3.3	0	8.9	0	0	0	6.4	1.6	37.4	0	10.4	0.10001	0	0	0	64.3	0	0	6.7	18.7	0	0	0	0	0	16.5	0	14.9	2.7	87.3	35.5	0	12	6	0	6.7	0	0	85.6	5	0	9	3.1	13.7	0	0	0	0	35.8
0	12.8	0	5.3	0	0	0	69.6	8.5	20.2	0	0.89999	5.9	0	0	0	11	0	0	0	0	0	0	0	0	0	135.3	0	15.9	48.7	19.6	0	0	4.3	3.7	0	0.90002	0	0	2.1	5.4	0	10.5	37.3	11.1	0	0	0	0	13.5
0	322.3	0	92.4	0	0	0	82.7	9.1	39.3	0	24.2	29.2	0	0	0	37.4	0	0	0	0	0	0	0	0	0	0	0	8	2.9	0	0	0	5.1	0.19998	0	73.5	0	0	2.3	55	0	0.40002	19.4	0.29999	0	0	0	0	65.6
0	53.9	0	299.2	0	0	0	0	10.9	179.3	0	11.2	137	0	0	0	26.4	0	0	0	0	0	0	0	0	0	0	0	2	2.1	0	0	0	34.7	3.7	0	12.3	0	0	0	4.5	0	0.39996	5.9	7.5	0	0	0	0	8.7
0	0	0	0	0	0	0	0	7.7	0	0	3.1	81.2	0	0	0	99.7	0	0	0	0	0	0	0	0	0	0	0	116.1	27.2	0	0	0	44.9	3.3	0	85.6	0	0	0	99.1	0	11.2	27.3	1.7	0	0	0	0	0.10004
0	0	0	0	0	0	0	0	7.7	0	0	82.6	0	0	0	0	0	0	0	0	0	0	0	0	0	0	0	0	2.8	81.1	0	0	0	43.9	1	0	2.6	0	0	0	10.5	0	27.2	11.4	9	0	0	0	0	14.7
0	0	0	0	0	0	0	0	13.5	0	0	99.9	0	0	0	0	0	0	0	0	0	0	0	0	0	0	0	0	0	0.80005	0	0	0	13.4	3.1	0	30	0	0	0	1.1	0	6.2	0.79999	89.8	0	0	0	0	2.1
0	0	0	0	0	0	0	0	193.8	0	0	0	0	0	0	0	0	0	0	0	0	0	0	0	0	0	0	0	0	0	0	0	0	0	1.7	0	0	0	0	0	0	0	42.7	0.79999	0	0	0	0	0	4.5
0	0	0	0	0	0	0	0	0	0	0	0	0	0	0	0	0	0	0	0	0	0	0	0	0	0	0	0	0	0	0	0	0	0	3.1	0	0	0	0	0	0	0	17.5	59.4	0	0	0	0	0	28.8
0	0	0	0	0	0	0	0	0	0	0	0	0	0	0	0	0	0	0	0	0	0	0	0	0	0	0	0	0	0	0	0	0	0	3.9	0	0	0	0	0	0	0	6.7	0	0	0	0	0	0	0.29999
0	0	0	0	0	0	0	0	0	0	0	0	0	0	0	0	0	0	0	0	0	0	0	0	0	0	0	0	0	0	0	0	0	0	33.5	0	0	0	0	0	0	0	16.4	0	0	0	0	0	0	12.9
0	0	0	0	0	0	0	0	0	0	0	0	0	0	0	0	0	0	0	0	0	0	0	0	0	0	0	0	0	0	0	0	0	0	0.10004	0	0	0	0	0	0	0	6.5	0	0	0	0	0	0	22.2
0	0	0	0	0	0	0	0	0	0	0	0	0	0	0	0	0	0	0	0	0	0	0	0	0	0	0	0	0	0	0	0	0	0	0.20001	0	0	0	0	0	0	0	0	0	0	0	0	0	0	0
0	0	0	0	0	0	0	0	0	0	0	0	0	0	0	0	0	0	0	0	0	0	0	0	0	0	0	0	0	0	0	0	0	0	17.6	0	0	0	0	0	0	0	0	0	0	0	0	0	0	0
0	0	0	0	0	0	0	0	0	0	0	0	0	0	0	0	0	0	0	0	0	0	0	0	0	0	0	0	0	0	0	0	0	0	1.8	0	0	0	0	0	0	0	0	0	0	0	0	0	0	0
0	0	0	0	0	0	0	0	0	0	0	0	0	0	0	0	0	0	0	0	0	0	0	0	0	0	0	0	0	0	0	0	0	0	19.3	0	0	0	0	0	0	0	0	0	0	0	0	0	0	0
0	0	0	0	0	0	0	0	0	0	0	0	0	0	0	0	0	0	0	0	0	0	0	0	0	0	0	0	0	0	0	0	0	0	114	0	0	0	0	0	0	0	0	0	0	0	0	0	0	0
0	0	0	0	0	0	0	0	0	0	0	0	0	0	0	0	0	0	0	0	0	0	0	0	0	0	0	0	0	0	0	0	0	0	0.1	0	0	0	0	0	0	0	0	0	0	0	0	0	0	0
0	0	0	0	0	0	0	0	0	0	0	0	0	0	0	0	0	0	0	0	0	0	0	0	0	0	0	0	0	0	0	0	0	0	0.1	0	0	0	0	0	0	0	0	0	0	0	0	0	0	0
0	0	0	0	0	0	0	0	0	0	0	0	0	0	0	0	0	0	0	0	0	0	0	0	0	0	0	0	0	0	0	0	0	0	0	0	0	0	0	0	0	0	0	0	0	0	0	0	0	0
0	0	0	0	0	0	0	0	0	0	0	0	0	0	0	0	0	0	0	0	0	0	0	0	0	0	0	0	0	0	0	0	0	0	0	0	0	0	0	0	0	0	0	0	0	0	0	0	0	0
0	0	0	0	0	0	0	0	0	0	0	0	0	0	0	0	0	0	0	0	0	0	0	0	0	0	0	0	0	0	0	0	0	0	0	0	0	0	0	0	0	0	0	0	0	0	0	0	0	0
0	0	0	0	0	0	0	0	0	0	0	0	0	0	0	0	0	0	0	0	0	0	0	0	0	0	0	0	0	0	0	0	0	0	0	0	0	0	0	0	0	0	0	0	0	0	0	0	0	0
0	0	0	0	0	0	0	0	0	0	0	0	0	0	0	0	0	0	0	0	0	0	0	0	0	0	0	0	0	0	0	0	0	0	0	0	0	0	0	0	0	0	0	0	0	0	0	0	0	0
0	0	0	0	0	0	0	0	0	0	0	0	0	0	0	0	0	0	0	0	0	0	0	0	0	0	0	0	0	0	0	0	0	0	0	0	0	0	0	0	0	0	0	0	0	0	0	0	0	0
0	0	0	0	0	0	0	0	0	0	0	0	0	0	0	0	0	0	0	0	0	0	0	0	0	0	0	0	0	0	0	0	0	0	0	0	0	0	0	0	0	0	0	0	0	0	0	0	0	0
0	0	0	0	0	0	0	0	0	0	0	0	0	0	0	0	0	0	0	0	0	0	0	0	0	0	0	0	0	0	0	0	0	0	0	0	0	0	0	0	0	0	0	0	0	0	0	0	0	0
0	0	0	0	0	0	0	0	0	0	0	0	0	0	0	0	0	0	0	0	0	0	0	0	0	0	0	0	0	0	0	0	0	0	0	0	0	0	0	0	0	0	0	0	0	0	0	0	0	0
0	0	0	0	0	0	0	0	0	0	0	0	0	0	0	0	0	0	0	0	0	0	0	0	0	0	0	0	0	0	0	0	0	0	0	0	0	0	0	0	0	0	0	0	0	0	0	0	0	0
0	0	0	0	0	0	0	0	0	0	0	0	0	0	0	0	0	0	0	0	0	0	0	0	0	0	0	0	0	0	0	0	0	0	0	0	0	0	0	0	0	0	0	0	0	0	0	0	0	0
0	0	0	0	0	0	0	0	0	0	0	0	0	0	0	0	0	0	0	0	0	0	0	0	0	0	0	0	0	0	0	0	0	0	0	0	0	0	0	0	0	0	0	0	0	0	0	0	0	0
0	0	0	0	0	0	0	0	0	0	0	0	0	0	0	0	0	0	0	0	0	0	0	0	0	0	0	0	0	0	0	0	0	0	0	0	0	0	0	0	0	0	0	0	0	0	0	0	0	0
0	0	0	0	0	0	0	0	0	0	0	0	0	0	0	0	0	0	0	0	0	0	0	0	0	0	0	0	0	0	0	0	0	0	0	0	0	0	0	0	0	0	0	0	0	0	0	0	0	0
0	0	0	0	0	0	0	0	0	0	0	0	0	0	0	0	0	0	0	0	0	0	0	0	0	0	0	0	0	0	0	0	0	0	0	0	0	0	0	0	0	0	0	0	0	0	0	0	0	0
0	0	0	0	0	0	0	0	0	0	0	0	0	0	0	0	0	0	0	0	0	0	0	0	0	0	0	0	0	0	0	0	0	0	0	0	0	0	0	0	0	0	0	0	0	0	0	0	0	0
0	0	0	0	0	0	0	0	0	0	0	0	0	0	0	0	0	0	0	0	0	0	0	0	0	0	0	0	0	0	0	0	0	0	0	0	0	0	0	0	0	0	0	0	0	0	0	0	0	0
0	0	0	0	0	0	0	0	0	0	0	0	0	0	0	0	0	0	0	0	0	0	0	0	0	0	0	0	0	0	0	0	0	0	0	0	0	0	0	0	0	0	0	0	0	0	0	0	0	0
0	0	0	0	0	0	0	0	0	0	0	0	0	0	0	0	0	0	0	0	0	0	0	0	0	0	0	0	0	0	0	0	0	0	0	0	0	0	0	0	0	0	0	0	0	0	0	0	0	0
0	0	0	0	0	0	0	0	0	0	0	0	0	0	0	0	0	0	0	0	0	0	0	0	0	0	0	0	0	0	0	0	0	0	0	0	0	0	0	0	0	0	0	0	0	0	0	0	0	0
0	0	0	0	0	0	0	0	0	0	0	0	0	0	0	0	0	0	0	0	0	0	0	0	0	0	0	0	0	0	0	0	0	0	0	0	0	0	0	0	0	0	0	0	0	0	0	0	0	0
0	0	0	0	0	0	0	0	0	0	0	0	0	0	0	0	0	0	0	0	0	0	0	0	0	0	0	0	0	0	0	0	0	0	0	0	0	0	0	0	0	0	0	0	0	0	0	0	0	0
0	0	0	0	0	0	0	0	0	0	0	0	0	0	0	0	0	0	0	0	0	0	0	0	0	0	0	0	0	0	0	0	0	0	0	0	0	0	0	0	0	0	0	0	0	0	0	0	0	0
0	0	0	0	0	0	0	0	0	0	0	0	0	0	0	0	0	0	0	0	0	0	0	0	0	0	0	0	0	0	0	0	0	0	0	0	0	0	0	0	0	0	0	0	0	0	0	0	0	0
0	0	0	0	0	0	0	0	0	0	0	0	0	0	0	0	0	0	0	0	0	0	0	0	0	0	0	0	0	0	0	0	0	0	0	0	0	0	0	0	0	0	0	0	0	0	0	0	0	0
0	0	0	0	0	0	0	0	0	0	0	0	0	0	0	0	0	0	0	0	0	0	0	0	0	0	0	0	0	0	0	0	0	0	0	0	0	0	0	0	0	0	0	0	0	0	0	0	0	0
0	0	0	0	0	0	0	0	0	0	0	0	0	0	0	0	0	0	0	0	0	0	0	0	0	0	0	0	0	0	0	0	0	0	0	0	0	0	0	0	0	0	0	0	0	0	0	0	0	0
0	0	0	0	0	0	0	0	0	0	0	0	0	0	0	0	0	0	0	0	0	0	0	0	0	0	0	0	0	0	0	0	0	0	0	0	0	0	0	0	0	0	0	0	0	0	0	0	0	0
0	0	0	0	0	0	0	0	0	0	0	0	0	0	0	0	0	0	0	0	0	0	0	0	0	0	0	0	0	0	0	0	0	0	0	0	0	0	0	0	0	0	0	0	0	0	0	0	0	0
0	0	0	0	0	0	0	0	0	0	0	0	0	0	0	0	0	0	0	0	0	0	0	0	0	0	0	0	0	0	0	0	0	0	0	0	0	0	0	0	0	0	0	0	0	0	0	0	0	0
0	0	0	0	0	0	0	0	0	0	0	0	0	0	0	0	0	0	0	0	0	0	0	0	0	0	0	0	0	0	0	0	0	0	0	0	0	0	0	0	0	0	0	0	0	0	0	0	0	0
0	0	0	0	0	0	0	0	0	0	0	0	0	0	0	0	0	0	0	0	0	0	0	0	0	0	0	0	0	0	0	0	0	0	0	0	0	0	0	0	0	0	0	0	0	0	0	0	0	0
0	0	0	0	0	0	0	0	0	0	0	0	0	0	0	0	0	0	0	0	0	0	0	0	0	0	0	0	0	0	0	0	0	0	0	0	0	0	0	0	0	0	0	0	0	0	0	0	0	0
0	0	0	0	0	0	0	0	0	0	0	0	0	0	0	0	0	0	0	0	0	0	0	0	0	0	0	0	0	0	0	0	0	0	0	0	0	0	0	0	0	0	0	0	0	0	0	0	0	0
0	0	0	0	0	0	0	0	0	0	0	0	0	0	0	0	0	0	0	0	0	0	0	0	0	0	0	0	0	0	0	0	0	0	0	0	0	0	0	0	0	0	0	0	0	0	0	0	0	0
0	0	0	0	0	0	0	0	0	0	0	0	0	0	0	0	0	0	0	0	0	0	0	0	0	0	0	0	0	0	0	0	0	0	0	0	0	0	0	0	0	0	0	0	0	0	0	0	0	0
0	0	0	0	0	0	0	0	0	0	0	0	0	0	0	0	0	0	0	0	0	0	0	0	0	0	0	0	0	0	0	0	0	0	0	0	0	0	0	0	0	0	0	0	0	0	0	0	0	0
0	0	0	0	0	0	0	0	0	0	0	0	0	0	0	0	0	0	0	0	0	0	0	0	0	0	0	0	0	0	0	0	0	0	0	0	0	0	0	0	0	0	0	0	0	0	0	0	0	0
0	0	0	0	0	0	0	0	0	0	0	0	0	0	0	0	0	0	0	0	0	0	0	0	0	0	0	0	0	0	0	0	0	0	0	0	0	0	0	0	0	0	0	0	0	0	0	0	0	0
0	0	0	0	0	0	0	0	0	0	0	0	0	0	0	0	0	0	0	0	0	0	0	0	0	0	0	0	0	0	0	0	0	0	0	0	0	0	0	0	0	0	0	0	0	0	0	0	0	0
0	0	0	0	0	0	0	0	0	0	0	0	0	0	0	0	0	0	0	0	0	0	0	0	0	0	0	0	0	0	0	0	0	0	0	0	0	0	0	0	0	0	0	0	0	0	0	0	0	0
0	0	0	0	0	0	0	0	0	0	0	0	0	0	0	0	0	0	0	0	0	0	0	0	0	0	0	0	0	0	0	0	0	0	0	0	0	0	0	0	0	0	0	0	0	0	0	0	0	0
0	0	0	0	0	0	0	0	0	0	0	0	0	0	0	0	0	0	0	0	0	0	0	0	0	0	0	0	0	0	0	0	0	0	0	0	0	0	0	0	0	0	0	0	0	0	0	0	0	0
0	0	0	0	0	0	0	0	0	0	0	0	0	0	0	0	0	0	0	0	0	0	0	0	0	0	0	0	0	0	0	0	0	0	0	0	0	0	0	0	0	0	0	0	0	0	0	0	0	0
0	0	0	0	0	0	0	0	0	0	0	0	0	0	0	0	0	0	0	0	0	0	0	0	0	0	0	0	0	0	0	0	0	0	0	0	0	0	0	0	0	0	0	0	0	0	0	0	0	0
0	0	0	0	0	0	0	0	0	0	0	0	0	0	0	0	0	0	0	0	0	0	0	0	0	0	0	0	0	0	0	0	0	0	0	0	0	0	0	0	0	0	0	0	0	0	0	0	0	0
0	0	0	0	0	0	0	0	0	0	0	0	0	0	0	0	0	0	0	0	0	0	0	0	0	0	0	0	0	0	0	0	0	0	0	0	0	0	0	0	0	0	0	0	0	0	0	0	0	0
0	0	0	0	0	0	0	0	0	0	0	0	0	0	0	0	0	0	0	0	0	0	0	0	0	0	0	0	0	0	0	0	0	0	0	0	0	0	0	0	0	0	0	0	0	0	0	0	0	0
0	0	0	0	0	0	0	0	0	0	0	0	0	0	0	0	0	0	0	0	0	0	0	0	0	0	0	0	0	0	0	0	0	0	0	0	0	0	0	0	0	0	0	0	0	0	0	0	0	0
0	0	0	0	0	0	0	0	0	0	0	0	0	0	0	0	0	0	0	0	0	0	0	0	0	0	0	0	0	0	0	0	0	0	0	0	0	0	0	0	0	0	0	0	0	0	0	0	0	0
0	0	0	0	0	0	0	0	0	0	0	0	0	0	0	0	0	0	0	0	0	0	0	0	0	0	0	0	0	0	0	0	0	0	0	0	0	0	0	0	0	0	0	0	0	0	0	0	0	0
0	0	0	0	0	0	0	0	0	0	0	0	0	0	0	0	0	0	0	0	0	0	0	0	0	0	0	0	0	0	0	0	0	0	0	0	0	0	0	0	0	0	0	0	0	0	0	0	0	0
0	0	0	0	0	0	0	0	0	0	0	0	0	0	0	0	0	0	0	0	0	0	0	0	0	0	0	0	0	0	0	0	0	0	0	0	0	0	0	0	0	0	0	0	0	0	0	0	0	0
0	0	0	0	0	0	0	0	0	0	0	0	0	0	0	0	0	0	0	0	0	0	0	0	0	0	0	0	0	0	0	0	0	0	0	0	0	0	0	0	0	0	0	0	0	0	0	0	0	0
0	0	0	0	0	0	0	0	0	0	0	0	0	0	0	0	0	0	0	0	0	0	0	0	0	0	0	0	0	0	0	0	0	0	0	0	0	0	0	0	0	0	0	0	0	0	0	0	0	0
0	0	0	0	0	0	0	0	0	0	0	0	0	0	0	0	0	0	0	0	0	0	0	0	0	0	0	0	0	0	0	0	0	0	0	0	0	0	0	0	0	0	0	0	0	0	0	0	0	0
0	0	0	0	0	0	0	0	0	0	0	0	0	0	0	0	0	0	0	0	0	0	0	0	0	0	0	0	0	0	0	0	0	0	0	0	0	0	0	0	0	0	0	0	0	0	0	0	0	0
0	0	0	0	0	0	0	0	0	0	0	0	0	0	0	0	0	0	0	0	0	0	0	0	0	0	0	0	0	0	0	0	0	0	0	0	0	0	0	0	0	0	0	0	0	0	0	0	0	0
0	0	0	0	0	0	0	0	0	0	0	0	0	0	0	0	0	0	0	0	0	0	0	0	0	0	0	0	0	0	0	0	0	0	0	0	0	0	0	0	0	0	0	0	0	0	0	0	0	0
0	0	0	0	0	0	0	0	0	0	0	0	0	0	0	0	0	0	0	0	0	0	0	0	0	0	0	0	0	0	0	0	0	0	0	0	0	0	0	0	0	0	0	0	0	0	0	0	0	0
0	0	0	0	0	0	0	0	0	0	0	0	0	0	0	0	0	0	0	0	0	0	0	0	0	0	0	0	0	0	0	0	0	0	0	0	0	0	0	0	0	0	0	0	0	0	0	0	0	0
0	0	0	0	0	0	0	0	0	0	0	0	0	0	0	0	0	0	0	0	0	0	0	0	0	0	0	0	0	0	0	0	0	0	0	0	0	0	0	0	0	0	0	0	0	0	0	0	0	0
0	0	0	0	0	0	0	0	0	0	0	0	0	0	0	0	0	0	0	0	0	0	0	0	0	0	0	0	0	0	0	0	0	0	0	0	0	0	0	0	0	0	0	0	0	0	0	0	0	0
0	0	0	0	0	0	0	0	0	0	0	0	0	0	0	0	0	0	0	0	0	0	0	0	0	0	0	0	0	0	0	0	0	0	0	0	0	0	0	0	0	0	0	0	0	0	0	0	0	0
0	0	0	0	0	0	0	0	0	0	0	0	0	0	0	0	0	0	0	0	0	0	0	0	0	0	0	0	0	0	0	0	0	0	0	0	0	0	0	0	0	0	0	0	0	0	0	0	0	0
0	0	0	0	0	0	0	0	0	0	0	0	0	0	0	0	0	0	0	0	0	0	0	0	0	0	0	0	0	0	0	0	0	0	0	0	0	0	0	0	0	0	0	0	0	0	0	0	0	0
0	0	0	0	0	0	0	0	0	0	0	0	0	0	0	0	0	0	0	0	0	0	0	0	0	0	0	0	0	0	0	0	0	0	0	0	0	0	0	0	0	0	0	0	0	0	0	0	0	0
0	0	0	0	0	0	0	0	0	0	0	0	0	0	0	0	0	0	0	0	0	0	0	0	0	0	0	0	0	0	0	0	0	0	0	0	0	0	0	0	0	0	0	0	0	0	0	0	0	0
0	0	0	0	0	0	0	0	0	0	0	0	0	0	0	0	0	0	0	0	0	0	0	0	0	0	0	0	0	0	0	0	0	0	0	0	0	0	0	0	0	0	0	0	0	0	0	0	0	0
0	0	0	0	0	0	0	0	0	0	0	0	0	0	0	0	0	0	0	0	0	0	0	0	0	0	0	0	0	0	0	0	0	0	0	0	0	0	0	0	0	0	0	0	0	0	0	0	0	0
0	0	0	0	0	0	0	0	0	0	0	0	0	0	0	0	0	0	0	0	0	0	0	0	0	0	0	0	0	0	0	0	0	0	0	0	0	0	0	0	0	0	0	0	0	0	0	0	0	0
0	0	0	0	0	0	0	0	0	0	0	0	0	0	0	0	0	0	0	0	0	0	0	0	0	0	0	0	0	0	0	0	0	0	0	0	0	0	0	0	0	0	0	0	0	0	0	0	0	0
0	0	0	0	0	0	0	0	0	0	0	0	0	0	0	0	0	0	0	0	0	0	0	0	0	0	0	0	0	0	0	0	0	0	0	0	0	0	0	0	0	0	0	0	0	0	0	0	0	0
0	0	0	0	0	0	0	0	0	0	0	0	0	0	0	0	0	0	0	0	0	0	0	0	0	0	0	0	0	0	0	0	0	0	0	0	0	0	0	0	0	0	0	0	0	0	0	0	0	0
0	0	0	0	0	0	0	0	0	0	0	0	0	0	0	0	0	0	0	0	0	0	0	0	0	0	0	0	0	0	0	0	0	0	0	0	0	0	0	0	0	0	0	0	0	0	0	0	0	0
0	0	0	0	0	0	0	0	0	0	0	0	0	0	0	0	0	0	0	0	0	0	0	0	0	0	0	0	0	0	0	0	0	0	0	0	0	0	0	0	0	0	0	0	0	0	0	0	0	0
0	0	0	0	0	0	0	0	0	0	0	0	0	0	0	0	0	0	0	0	0	0	0	0	0	0	0	0	0	0	0	0	0	0	0	0	0	0	0	0	0	0	0	0	0	0	0	0	0	0
0	0	0	0	0	0	0	0	0	0	0	0	0	0	0	0	0	0	0	0	0	0	0	0	0	0	0	0	0	0	0	0	0	0	0	0	0	0	0	0	0	0	0	0	0	0	0	0	0	0
0	0	0	0	0	0	0	0	0	0	0	0	0	0	0	0	0	0	0	0	0	0	0	0	0	0	0	0	0	0	0	0	0	0	0	0	0	0	0	0	0	0	0	0	0	0	0	0	0	0
0	0	0	0	0	0	0	0	0	0	0	0	0	0	0	0	0	0	0	0	0	0	0	0	0	0	0	0	0	0	0	0	0	0	0	0	0	0	0	0	0	0	0	0	0	0	0	0	0	0
0	0	0	0	0	0	0	0	0	0	0	0	0	0	0	0	0	0	0	0	0	0	0	0	0	0	0	0	0	0	0	0	0	0	0	0	0	0	0	0	0	0	0	0	0	0	0	0	0	0
0	0	0	0	0	0	0	0	0	0	0	0	0	0	0	0	0	0	0	0	0	0	0	0	0	0	0	0	0	0	0	0	0	0	0	0	0	0	0	0	0	0	0	0	0	0	0	0	0	0
0	0	0	0	0	0	0	0	0	0	0	0	0	0	0	0	0	0	0	0	0	0	0	0	0	0	0	0	0	0	0	0	0	0	0	0	0	0	0	0	0	0	0	0	0	0	0	0	0	0
0	0	0	0	0	0	0	0	0	0	0	0	0	0	0	0	0	0	0	0	0	0	0	0	0	0	0	0	0	0	0	0	0	0	0	0	0	0	0	0	0	0	0	0	0	0	0	0	0	0
0	0	0	0	0	0	0	0	0	0	0	0	0	0	0	0	0	0	0	0	0	0	0	0	0	0	0	0	0	0	0	0	0	0	0	0	0	0	0	0	0	0	0	0	0	0	0	0	0	0
0	0	0	0	0	0	0	0	0	0	0	0	0	0	0	0	0	0	0	0	0	0	0	0	0	0	0	0	0	0	0	0	0	0	0	0	0	0	0	0	0	0	0	0	0	0	0	0	0	0
0	0	0	0	0	0	0	0	0	0	0	0	0	0	0	0	0	0	0	0	0	0	0	0	0	0	0	0	0	0	0	0	0	0	0	0	0	0	0	0	0	0	0	0	0	0	0	0	0	0
0	0	0	0	0	0	0	0	0	0	0	0	0	0	0	0	0	0	0	0	0	0	0	0	0	0	0	0	0	0	0	0	0	0	0	0	0	0	0	0	0	0	0	0	0	0	0	0	0	0
0	0	0	0	0	0	0	0	0	0	0	0	0	0	0	0	0	0	0	0	0	0	0	0	0	0	0	0	0	0	0	0	0	0	0	0	0	0	0	0	0	0	0	0	0	0	0	0	0	0
0	0	0	0	0	0	0	0	0	0	0	0	0	0	0	0	0	0	0	0	0	0	0	0	0	0	0	0	0	0	0	0	0	0	0	0	0	0	0	0	0	0	0	0	0	0	0	0	0	0
0	0	0	0	0	0	0	0	0	0	0	0	0	0	0	0	0	0	0	0	0	0	0	0	0	0	0	0	0	0	0	0	0	0	0	0	0	0	0	0	0	0	0	0	0	0	0	0	0	0
0	0	0	0	0	0	0	0	0	0	0	0	0	0	0	0	0	0	0	0	0	0	0	0	0	0	0	0	0	0	0	0	0	0	0	0	0	0	0	0	0	0	0	0	0	0	0	0	0	0
0	0	0	0	0	0	0	0	0	0	0	0	0	0	0	0	0	0	0	0	0	0	0	0	0	0	0	0	0	0	0	0	0	0	0	0	0	0	0	0	0	0	0	0	0	0	0	0	0	0
0	0	0	0	0	0	0	0	0	0	0	0	0	0	0	0	0	0	0	0	0	0	0	0	0	0	0	0	0	0	0	0	0	0	0	0	0	0	0	0	0	0	0	0	0	0	0	0	0	0
0	0	0	0	0	0	0	0	0	0	0	0	0	0	0	0	0	0	0	0	0	0	0	0	0	0	0	0	0	0	0	0	0	0	0	0	0	0	0	0	0	0	0	0	0	0	0	0	0	0
0	0	0	0	0	0	0	0	0	0	0	0	0	0	0	0	0	0	0	0	0	0	0	0	0	0	0	0	0	0	0	0	0	0	0	0	0	0	0	0	0	0	0	0	0	0	0	0	0	0
0	0	0	0	0	0	0	0	0	0	0	0	0	0	0	0	0	0	0	0	0	0	0	0	0	0	0	0	0	0	0	0	0	0	0	0	0	0	0	0	0	0	0	0	0	0	0	0	0	0
0	0	0	0	0	0	0	0	0	0	0	0	0	0	0	0	0	0	0	0	0	0	0	0	0	0	0	0	0	0	0	0	0	0	0	0	0	0	0	0	0	0	0	0	0	0	0	0	0	0
0	0	0	0	0	0	0	0	0	0	0	0	0	0	0	0	0	0	0	0	0	0	0	0	0	0	0	0	0	0	0	0	0	0	0	0	0	0	0	0	0	0	0	0	0	0	0	0	0	0
0	0	0	0	0	0	0	0	0	0	0	0	0	0	0	0	0	0	0	0	0	0	0	0	0	0	0	0	0	0	0	0	0	0	0	0	0	0	0	0	0	0	0	0	0	0	0	0	0	0
0	0	0	0	0	0	0	0	0	0	0	0	0	0	0	0	0	0	0	0	0	0	0	0	0	0	0	0	0	0	0	0	0	0	0	0	0	0	0	0	0	0	0	0	0	0	0	0	0	0
0	0	0	0	0	0	0	0	0	0	0	0	0	0	0	0	0	0	0	0	0	0	0	0	0	0	0	0	0	0	0	0	0	0	0	0	0	0	0	0	0	0	0	0	0	0	0	0	0	0
0	0	0	0	0	0	0	0	0	0	0	0	0	0	0	0	0	0	0	0	0	0	0	0	0	0	0	0	0	0	0	0	0	0	0	0	0	0	0	0	0	0	0	0	0	0	0	0	0	0
0	0	0	0	0	0	0	0	0	0	0	0	0	0	0	0	0	0	0	0	0	0	0	0	0	0	0	0	0	0	0	0	0	0	0	0	0	0	0	0	0	0	0	0	0	0	0	0	0	0
0	0	0	0	0	0	0	0	0	0	0	0	0	0	0	0	0	0	0	0	0	0	0	0	0	0	0	0	0	0	0	0	0	0	0	0	0	0	0	0	0	0	0	0	0	0	0	0	0	0
0	0	0	0	0	0	0	0	0	0	0	0	0	0	0	0	0	0	0	0	0	0	0	0	0	0	0	0	0	0	0	0	0	0	0	0	0	0	0	0	0	0	0	0	0	0	0	0	0	0
0	0	0	0	0	0	0	0	0	0	0	0	0	0	0	0	0	0	0	0	0	0	0	0	0	0	0	0	0	0	0	0	0	0	0	0	0	0	0	0	0	0	0	0	0	0	0	0	0	0
0	0	0	0	0	0	0	0	0	0	0	0	0	0	0	0	0	0	0	0	0	0	0	0	0	0	0	0	0	0	0	0	0	0	0	0	0	0	0	0	0	0	0	0	0	0	0	0	0	0
0	0	0	0	0	0	0	0	0	0	0	0	0	0	0	0	0	0	0	0	0	0	0	0	0	0	0	0	0	0	0	0	0	0	0	0	0	0	0	0	0	0	0	0	0	0	0	0	0	0
0	0	0	0	0	0	0	0	0	0	0	0	0	0	0	0	0	0	0	0	0	0	0	0	0	0	0	0	0	0	0	0	0	0	0	0	0	0	0	0	0	0	0	0	0	0	0	0	0	0
0	0	0	0	0	0	0	0	0	0	0	0	0	0	0	0	0	0	0	0	0	0	0	0	0	0	0	0	0	0	0	0	0	0	0	0	0	0	0	0	0	0	0	0	0	0	0	0	0	0
0	0	0	0	0	0	0	0	0	0	0	0	0	0	0	0	0	0	0	0	0	0	0	0	0	0	0	0	0	0	0	0	0	0	0	0	0	0	0	0	0	0	0	0	0	0	0	0	0	0
0	0	0	0	0	0	0	0	0	0	0	0	0	0	0	0	0	0	0	0	0	0	0	0	0	0	0	0	0	0	0	0	0	0	0	0	0	0	0	0	0	0	0	0	0	0	0	0	0	0
0	0	0	0	0	0	0	0	0	0	0	0	0	0	0	0	0	0	0	0	0	0	0	0	0	0	0	0	0	0	0	0	0	0	0	0	0	0	0	0	0	0	0	0	0	0	0	0	0	0
0	0	0	0	0	0	0	0	0	0	0	0	0	0	0	0	0	0	0	0	0	0	0	0	0	0	0	0	0	0	0	0	0	0	0	0	0	0	0	0	0	0	0	0	0	0	0	0	0	0
0	0	0	0	0	0	0	0	0	0	0	0	0	0	0	0	0	0	0	0	0	0	0	0	0	0	0	0	0	0	0	0	0	0	0	0	0	0	0	0	0	0	0	0	0	0	0	0	0	0
0	0	0	0	0	0	0	0	0	0	0	0	0	0	0	0	0	0	0	0	0	0	0	0	0	0	0	0	0	0	0	0	0	0	0	0	0	0	0	0	0	0	0	0	0	0	0	0	0	0
0	0	0	0	0	0	0	0	0	0	0	0	0	0	0	0	0	0	0	0	0	0	0	0	0	0	0	0	0	0	0	0	0	0	0	0	0	0	0	0	0	0	0	0	0	0	0	0	0	0
0	0	0	0	0	0	0	0	0	0	0	0	0	0	0	0	0	0	0	0	0	0	0	0	0	0	0	0	0	0	0	0	0	0	0	0	0	0	0	0	0	0	0	0	0	0	0	0	0	0
0	0	0	0	0	0	0	0	0	0	0	0	0	0	0	0	0	0	0	0	0	0	0	0	0	0	0	0	0	0	0	0	0	0	0	0	0	0	0	0	0	0	0	0	0	0	0	0	0	0
0	0	0	0	0	0	0	0	0	0	0	0	0	0	0	0	0	0	0	0	0	0	0	0	0	0	0	0	0	0	0	0	0	0	0	0	0	0	0	0	0	0	0	0	0	0	0	0	0	0
0	0	0	0	0	0	0	0	0	0	0	0	0	0	0	0	0	0	0	0	0	0	0	0	0	0	0	0	0	0	0	0	0	0	0	0	0	0	0	0	0	0	0	0	0	0	0	0	0	0
0	0	0	0	0	0	0	0	0	0	0	0	0	0	0	0	0	0	0	0	0	0	0	0	0	0	0	0	0	0	0	0	0	0	0	0	0	0	0	0	0	0	0	0	0	0	0	0	0	0
0	0	0	0	0	0	0	0	0	0	0	0	0	0	0	0	0	0	0	0	0	0	0	0	0	0	0	0	0	0	0	0	0	0	0	0	0	0	0	0	0	0	0	0	0	0	0	0	0	0
0	0	0	0	0	0	0	0	0	0	0	0	0	0	0	0	0	0	0	0	0	0	0	0	0	0	0	0	0	0	0	0	0	0	0	0	0	0	0	0	0	0	0	0	0	0	0	0	0	0
0	0	0	0	0	0	0	0	0	0	0	0	0	0	0	0	0	0	0	0	0	0	0	0	0	0	0	0	0	0	0	0	0	0	0	0	0	0	0	0	0	0	0	0	0	0	0	0	0	0
variances
1521.1	715.67	715.53	627.89	544.77	536.8	397.09	302.8	274.49	256.63	228.27	221.63	207.21	197.52	196.26	172.38	162.33	156.93	153.82	153.25	151.7	148.05	143.21	142.57	142.09	130.28	126.45	126.05	115.16	112.38	111.96	111.73	106.42	106.32	98.897	96.931	96.125	92.364	86.702	85.262	82.379	79.087	78.892	78.195	75.469	74.709	73.82	73.424	72.586	70.6
medians
15.4	14.05	5.4	8.1	58.7	29.4	19.4	10.1	7.7	7.5	27.75	10.1	8.2	11	17.7	7.3	22.5	6.6	31.6	6.7	9.4	8.4	4.5	6.9	4.3	11.1	2.55	9.95	10.6	9	12.6	6.1	8.15	13.4	3.7	2.65	6.7	6.7	7.4	5.6	1.8	4.25	9.1	6.4	6.7	13.5	5	15.9	11.8	6.75
[truncated: 112 more columns]
