# Supplementary material for: Real-time observation of signal recognition particle binding to actively translating ribosomes
Source: eLife. 2014 Oct 30;3:e04418. doi: 10.7554/eLife.04418 (PMC4213662; doi:10.7554/eLife.04418)
Supplement: Figure 2—source data 1. — Source data for Figure 2 (including figure supplements). DOI: http://dx.doi.org/10.7554/eLife.04418.009 [file elife04418s002.xlsx]

## Sheet: Fig2A
750nM			250nM
x_coord	y_coord		x_coord	y_coord
1	0.11348		1	0.22901
2	0.056738		2	0.25954
3	0.06383		3	0.076336
4	0.078014		4	0.12214
5	0.049645		5	0.076336
6	0.049645		6	0.068702
7	0.056738		7	0.022901
8	0.049645		8	0.0076336
9	0.06383		9	0.0076336
10	0.056738		10	0.022901
11	0.042553		11	0.015267
12	0.014184		12	0.0076336
13	0.035461		13	0.015267
14	0.028369		14	0.0076336
15	0.028369		15	0
16	0.028369		16	0.015267
17	0		17	0
18	0.014184		18	0
19	0.014184		19	0.0076336
20	0.014184		20	0
21	0		21	0.0076336
22	0.014184		22	0
23	0.021277		23	0.0076336
24	0.0070922		24	0
25	0.0070922		25	0
26	0.014184		26	0
27	0		27	0.015267
28	0.0070922		28	0
29	0.0070922		29	0
30	0		30	0
31	0		31	0
32	0		32	0
33	0.0070922		33	0
34	0.0070922		34	0.0076336
35	0.0070922
36	0.0070922
37	0.014184
38	0.0070922
39	0
40	0
41	0.0070922
42	0
43	0
44	0
45	0
46	0
47	0
48	0
49	0
50	0
51	0
52	0
53	0
54	0
55	0
56	0
57	0
58	0
59	0
60	0
61	0
62	0
63	0
64	0.0070922

## Sheet: Fig2B
750nM				250nM
RAW	CDF			RAW	CDF
First Arrivals	First x_coord	First y_coord		First Arrivals	First x_coord	First y_coord
206.1	12	0		763.7	11	0
205.7	12	0.0070922		439.8	11	0.0076336
80.4	17.5	0.014184		276.1	18.4	0.015267
321.4	18.8	0.021277		750.1	20.1	0.022901
332.8	19.1	0.028369		52	21.5	0.030534
285.4	35.3	0.035461		298.2	23.9	0.038168
362.7	36.9	0.042553		296.9	25.9	0.045802
353.5	55.2	0.049645		434.3	30.2	0.053435
185.3	61.2	0.056738		466.7	43.8	0.061069
295.4	65.3	0.06383		302.7	45.8	0.068702
295.7	80.4	0.070922		441.4	52	0.076336
286.1	106.8	0.078014		138.6	53.9	0.083969
228.2	108.5	0.085106		83.3	76.1	0.091603
154	127.8	0.092199		374.1	83.3	0.099237
17.5	131.8	0.099291		674.2	98.2	0.10687
269.9	138.2	0.10638		579.6	105	0.1145
208.7	140	0.11348		532.8	107.4	0.12214
140	142.2	0.12057		53.9	136.4	0.12977
175.6	147.5	0.12766		18.4	138.6	0.1374
380.8	147.8	0.13475		346	144.1	0.14504
278.1	154	0.14184		43.8	176.9	0.15267
328	154.3	0.14894		687.2	183.5	0.16031
206.8	161	0.15603		749.9	187.9	0.16794
225.8	162	0.16312		318	191.9	0.17557
172	165.4	0.17021		714.7	195.6	0.18321
283.4	172	0.1773		11	197	0.19084
219.5	175.6	0.1844		561.7	214	0.19847
183.8	178.4	0.19858		796.8	214.3	0.20611
213.2	180.5	0.20567		730.4	218.6	0.21374
289.5	183.8	0.21277		294.8	226.6	0.22137
439.7	185.3	0.21986		230.7	230.7	0.22901
552	190.6	0.22695		487.5	234.3	0.23664
192.6	192.6	0.23404		45.8	235.8	0.24427
290.9	196.1	0.24113		105	236	0.25191
106.8	200.8	0.24823		195.6	253.6	0.25954
178.4	201.2	0.25532		367	255.8	0.26718
345.8	205.7	0.26241		253.6	264.5	0.27481
330.1	206.1	0.2695		360.1	267.8	0.28244
255.2	206.8	0.2766		659.6	270.1	0.29008
429.3	208.7	0.28369		309.2	272.3	0.29771
320.7	213.2	0.29078		396.2	273	0.30534
353.4	215.5	0.29787		708.3	275.2	0.31298
228.9	217.5	0.30496		652.3	276.1	0.32061
201.2	219.5	0.31206		314.6	277.5	0.32824
235	220.1	0.31915		183.5	278.4	0.33588
228.2	225.8	0.33333		348.2	294.8	0.34351
616.5	228.2	0.34752		144.1	296.9	0.35115
269.1	228.9	0.35461		340.3	298.2	0.35878
19.1	234	0.3617		622.4	298.5	0.36641
416.8	235	0.36879		255.8	300	0.37405
306.7	236.1	0.37589		379.1	300.1	0.38168
365.8	236.6	0.38298		674.7	300.4	0.38931
236.6	238	0.39007		234.3	302.7	0.39695
309	249.9	0.39716		394.4	309.2	0.40458
225.8	254	0.40426		313.7	312.3	0.41221
261.7	254.4	0.41135		264.5	313.7	0.41985
180.5	255.2	0.41844		226.6	314.6	0.42748
127.8	257.3	0.42553		351.6	317	0.43511
190.6	261.7	0.43262		214.3	318	0.44275
165.4	266.9	0.43972		275.2	323.1	0.45038
108.5	269.1	0.44681		236	334.8	0.45802
520	269.9	0.4539		560.8	335.1	0.46565
355.8	271.4	0.46099		218.6	336	0.47328
609.8	272.7	0.46809		636.2	340.3	0.48092
447.3	275.6	0.47518		612.4	346	0.48855
417.1	278.1	0.48227		432.9	348.2	0.49618
279.6	279.6	0.48936		30.2	349.5	0.50382
371.8	283.4	0.49645		644.2	351.6	0.51145
55.2	285.4	0.50355		445.2	360.1	0.51908
381.6	286.1	0.51064		640	360.3	0.52672
257.3	286.5	0.51773		394.4	367	0.53435
35.3	289.4	0.52482		420.9	374.1	0.54198
677.4	289.5	0.53191		107.4	379.1	0.54962
178.4	290.9	0.53901		272.3	380.9	0.55725
458	295.4	0.5461		235.8	384.5	0.56489
561.6	295.7	0.55319		477.6	390.6	0.57252
220.1	297.8	0.56028		334.8	391.8	0.58015
390.9	299.5	0.56738		300.4	394.4	0.59542
396	302	0.57447		21.5	396.2	0.60305
544.4	306.7	0.58865		214	420.9	0.61069
266.9	309	0.59574		510.7	432.9	0.61832
572.1	318.8	0.60284		197	434.3	0.62595
333.9	320.7	0.60993		438.2	438.2	0.63359
161	321.4	0.61702		513	439.1	0.64122
518.5	325.5	0.62411		467.4	439.8	0.65649
409.4	328	0.63121		317	441.4	0.66412
436	330.1	0.6383		136.4	445.2	0.67176
425.1	332.8	0.64539		336	461.4	0.67939
238	333.9	0.65248		267.8	466.7	0.68702
398.9	334	0.65957		323.1	467.4	0.69466
550.6	338.4	0.66667		273	475.9	0.70229
751	343.8	0.67376		539.5	476.7	0.70992
254.4	345.1	0.68085		439.8	477.6	0.71756
138.2	345.8	0.68794		476.7	487.5	0.72519
349	349	0.70213		717.6	504.1	0.73282
254	353.4	0.70922		527.3	510.7	0.74046
36.9	353.5	0.71631		300.1	513	0.74809
306.7	355.8	0.7234		546.6	527.3	0.75573
18.8	361.4	0.7305		384.5	532.8	0.76336
61.2	362.7	0.73759		583.5	536.4	0.77099
299.5	365.8	0.74468		23.9	539.5	0.77863
302	371.5	0.75177		300	546.6	0.78626
272.7	371.8	0.75887		278.4	558.3	0.79389
131.8	380.8	0.76596		572.7	560.8	0.80153
65.3	381.6	0.77305		187.9	561.7	0.80916
453.9	390.9	0.78014		191.9	572.7	0.81679
371.5	396	0.78723		558.3	573.7	0.82443
249.9	398	0.79433		391.8	579.6	0.83206
516.3	398.9	0.80142		349.5	583.5	0.83969
318.8	408.9	0.80851		298.5	612.4	0.84733
325.5	409.4	0.8156		639.4	622.4	0.85496
424.1	416.8	0.8227		390.6	636.2	0.8626
297.8	417.1	0.82979		270.1	639.4	0.87023
661.3	424.1	0.83688		98.2	640	0.87786
12	425.1	0.84397		335.1	644.2	0.8855
361.4	429.3	0.85106		536.4	652.3	0.89313
286.5	436	0.85816		76.1	659.6	0.90076
236.1	439.7	0.86525		360.3	662.9	0.9084
398	447.3	0.87234		504.1	674.2	0.91603
215.5	453.9	0.87943		439.1	674.7	0.92366
217.5	458	0.88652		176.9	680.3	0.9313
200.8	516.3	0.89362		277.5	687.2	0.93893
343.8	518.5	0.90071		380.9	708.3	0.94656
534	520	0.9078		461.4	714.7	0.9542
142.2	534	0.91489		662.9	717.6	0.96183
408.9	544.4	0.92199		312.3	730.4	0.96947
338.4	550.6	0.92908		20.1	749.9	0.9771
196.1	552	0.93617		573.7	750.1	0.98473
147.8	561.6	0.94326		680.3	763.7	0.99237
271.4	572.1	0.95035		475.9	796.8	1
349	573.3	0.95745		25.9
573.3	609.8	0.96454
682.3	616.5	0.97163
289.4	661.3	0.97872
154.3	677.4	0.98582
345.1	682.3	0.99291
234	751	1
334
147.5
275.6
162

## Sheet: Fig2C
750nM				250nM
RAW	CDF			RAW	CDF
Late Arrivals	Late x_coord	Late y_coord		Late Arrivals	Late x_coord	Late y_coord
69.1	0.2	0		6.1	0.2	0
2.9	0.2	0.0055096		1.6	0.2	0.0040486
7.4	0.2	0.0082645		1.3	0.3	0.0080972
58.7	0.3	0.011019		4	0.3	0.012146
11.1	0.3	0.016529		6	0.4	0.016194
4.3	0.4	0.027548		3.1	0.4	0.020243
2.2	0.4	0.035813		4.4	0.4	0.024291
9.1	0.4	0.038567		1.9	0.5	0.032389
21.7	0.5	0.055096		6.7	0.6	0.036437
18	0.6	0.057851		0.7	0.6	0.048583
2.5	0.6	0.060606		110	0.7	0.05668
44.9	0.6	0.07438		4.8	0.8	0.060729
2.3	0.7	0.077135		34.7	0.8	0.064777
1	0.7	0.088154		2.7	0.9	0.068826
7.3	0.7	0.096419		13.7	1.2	0.072874
0.7	0.8	0.10193		13.3	1.3	0.080972
72	0.8	0.10744		87.4	1.3	0.08502
1.2	0.9	0.11295		37.5	1.4	0.089069
21.1	0.9	0.1157		13.9	1.5	0.093117
1.9	0.9	0.12397		52.1	1.6	0.097166
4	1	0.13223		27.4	1.6	0.11336
3.4	1.1	0.13499		0.6	1.7	0.11741
6.8	1.1	0.13774		14.8	1.7	0.12551
6.7	1.1	0.1405		31.6	1.7	0.12955
10.3	1.2	0.14325		0.5	1.8	0.1336
6.2	1.2	0.15152		57.3	1.8	0.13765
2.5	1.3	0.15702		16.7	1.8	0.1417
2.8	1.3	0.16529		9.2	1.8	0.14575
19.4	1.3	0.16804		0.4	1.9	0.15789
22.5	1.4	0.17355		33.5	1.9	0.16194
29.9	1.4	0.17906		111.1	2	0.17004
2.8	1.4	0.18457		5.7	2.1	0.18219
4.5	1.5	0.19835		5.8	2.2	0.18623
3.8	1.6	0.20661		18.3	2.2	0.19028
3.4	1.7	0.20937		81	2.5	0.19433
1.8	1.7	0.21212		26.3	2.7	0.19838
0.4	1.8	0.21763		4.7	2.7	0.20243
1.5	1.8	0.22039		122.2	2.9	0.20648
4.9	1.8	0.2259		16.4	3	0.21457
0.7	1.9	0.2314		1.9	3.1	0.21862
3.2	1.9	0.23416		2.5	3.1	0.22267
1.2	2	0.23967		11.9	3.2	0.22672
9	2.1	0.24242		5.9	3.3	0.23077
11.5	2.1	0.24518		2.2	3.3	0.23482
4.6	2.2	0.25344		3.8	3.5	0.23887
5.9	2.3	0.2562		5.3	3.7	0.24291
17.8	2.3	0.26446		6.7	3.8	0.24696
35.3	2.4	0.26722		18.9	4	0.25101
13.3	2.5	0.28099		16.8	4.1	0.25506
6.7	2.6	0.28375		6.6	4.2	0.26316
2.6	2.6	0.28926		24.9	4.3	0.26721
2.4	2.7	0.29201		42.5	4.4	0.2753
3.1	2.7	0.29477		26.1	4.6	0.27935
0.4	2.8	0.30303		15.4	4.7	0.2834
2.5	2.8	0.30854		15.1	4.7	0.28745
15.3	2.9	0.31129		16	4.8	0.2915
8.3	2.9	0.31405		37.2	4.8	0.29555
2.1	3	0.32231		8.3	5	0.30364
5.7	3.1	0.32507		6.2	5.1	0.30769
0.6	3.1	0.32782		4.7	5.1	0.31174
7.5	3.1	0.33609		45.2	5.3	0.31579
24.7	3.2	0.34711		9.7	5.4	0.31984
10.9	3.2	0.34986		169.9	5.4	0.32389
9.8	3.4	0.35813		2	5.7	0.32794
0.9	3.4	0.36364		1.8	5.8	0.33198
25.1	3.4	0.36639		3.7	5.9	0.34008
3.7	3.5	0.36915		38.6	6	0.34818
3.8	3.5	0.37741		98.5	6.1	0.35628
5.3	3.6	0.38017		5	6.2	0.36842
3	3.6	0.38292		1.9	6.3	0.37247
9.9	3.7	0.38843		15.4	6.6	0.37652
8.3	3.7	0.39118		4.4	6.6	0.38057
0.7	3.7	0.39394		14.2	6.7	0.38462
1.3	3.8	0.4022		48.5	6.7	0.39271
0.2	3.9	0.40771		6.3	6.8	0.39676
3	4	0.41598		29.3	7	0.40081
12.2	4.1	0.41873		21.4	7.4	0.41296
12.6	4.2	0.42149		43.4	7.5	0.417
1	4.2	0.42424		2.1	7.6	0.42105
3.6	4.3	0.42975		6.2	7.6	0.4251
2.8	4.4	0.43802		9.5	7.9	0.42915
16.9	4.4	0.44077		4.2	8.3	0.4332
21	4.5	0.44628		5.1	8.3	0.43725
3.7	4.6	0.45179		48.5	8.7	0.4413
1.8	4.6	0.46281		6.6	9	0.44534
37.2	4.7	0.46556		3	9.2	0.44939
0.5	4.8	0.47107		1.5	9.5	0.46154
7.2	4.8	0.47658		2.1	9.6	0.46559
4.6	4.9	0.47934		0.5	9.7	0.46964
30.1	4.9	0.48209		7	9.9	0.47368
41.6	5.2	0.48485		0.6	10.2	0.47773
17.7	5.3	0.49036		7.6	10.3	0.48178
0.6	5.4	0.49311		9.5	11.1	0.48583
39.6	5.4	0.49862		77	11.7	0.48988
0.5	5.5	0.50138		1.8	11.9	0.49393
13.9	5.6	0.50689		1.6	11.9	0.49798
8.9	5.6	0.51515		124.1	11.9	0.50202
3.6	5.7	0.51791		12.8	12.3	0.50607
5.2	5.7	0.52066		4.6	12.8	0.51012
45.3	5.7	0.52342		17.7	12.9	0.51417
0.5	5.8	0.52617		16	13	0.51822
3.8	5.8	0.52893		3.5	13.1	0.52227
0.3	5.9	0.53168		31.8	13.2	0.52632
6	5.9	0.53444		1.7	13.3	0.53036
0.9	5.9	0.53719		13.1	13.3	0.53441
8.9	6	0.5427		1.7	13.5	0.53846
4.4	6.1	0.54545		9.9	13.7	0.54251
27.3	6.1	0.54821		34.1	13.9	0.55061
21	6.2	0.55096		10.2	13.9	0.55466
1.6	6.2	0.55372		96.2	14.2	0.56275
10.2	6.3	0.55647		32.4	14.8	0.57085
4.2	6.4	0.55923		26.3	15.1	0.5749
4.8	6.6	0.56474		5.9	15.3	0.57895
16.7	6.7	0.56749		262.2	15.4	0.583
9.7	6.7	0.57025		26.7	15.4	0.58704
3	6.8	0.573		34.4	16	0.59514
0.7	6.8	0.57576		13.9	16.4	0.59919
0.8	7.1	0.57851		29.2	16.4	0.60324
1.1	7.2	0.58127		30.9	16.7	0.60729
2.8	7.3	0.58402		0.8	16.8	0.61134
10	7.4	0.58953		1.8	17	0.61538
1.5	7.5	0.60055		0.4	17.1	0.61943
6.2	7.7	0.60331		6.8	17.7	0.62348
11.2	7.8	0.60606		32.5	17.7	0.62753
6.1	7.8	0.60882		11.7	17.8	0.63158
1.7	8	0.61157		11.1	18.3	0.63563
1.2	8.3	0.61708		29.6	18.4	0.63968
0.9	8.4	0.61983		2.2	18.9	0.64372
5.8	8.5	0.62259		14.2	19	0.64777
1.1	8.7	0.62534		25.6	19.2	0.65182
13.2	8.8	0.6281		1.3	19.4	0.65587
8.5	8.8	0.63085		22.8	19.5	0.65992
3.1	8.9	0.64187		19.5	20	0.66397
1.3	9	0.65014		82.7	21.4	0.66802
4.6	9.1	0.65565		1.3	21.7	0.67206
17.3	9.3	0.6584		179.5	22	0.67611
24.6	9.6	0.66391		1.9	22.8	0.68016
1.3	9.7	0.66667		9.5	22.9	0.68421
4.6	9.8	0.66942		3.3	23.3	0.68826
3.4	9.8	0.67218		74.6	23.3	0.69231
20.6	9.9	0.67493		32.2	24.5	0.69636
6	10	0.67769		17.8	24.9	0.7004
1.4	10.1	0.68044		0.3	25.3	0.70445
1.6	10.2	0.6832		4.3	25.3	0.7085
119.2	10.2	0.68871		13	25.6	0.71255
13.2	10.3	0.69146		2.9	26.1	0.7166
24.1	10.3	0.69421		160.5	26.1	0.72065
5.6	10.6	0.69697		53.7	26.3	0.7247
5.6	10.7	0.69972		30.6	26.3	0.72874
0.4	10.9	0.70248		62.1	26.7	0.73279
1.4	11	0.70523		32.2	27.4	0.74089
13	11.1	0.70799		109.4	27.7	0.74494
2	11.1	0.71074		39.6	29.2	0.74899
3.1	11.2	0.7135		3.1	29.3	0.75304
3.7	11.5	0.71625		8.7	29.6	0.75709
5.4	11.7	0.71901		0.6	30.6	0.76113
5.4	12	0.72176		1.7	30.9	0.76518
0.6	12.2	0.72452		0.6	31.1	0.76923
7.7	12.6	0.72727		6.7	31.3	0.77328
8	13	0.73003		4.8	31.6	0.77733
30.9	13.2	0.73554		27.4	31.8	0.78138
9.3	13.3	0.73829		5	32	0.78543
47.1	13.5	0.74105		6	32.2	0.78947
0.5	13.7	0.7438		31.3	32.2	0.79352
10.1	13.9	0.74656		69.9	32.4	0.79757
18.4	14.2	0.74931		24.5	32.5	0.80162
16	14.8	0.75207		17.1	33.5	0.80567
0.3	15.3	0.75482		35.2	34.1	0.80972
4.4	15.6	0.75758		13.9	34.4	0.81377
2.6	15.9	0.76033		82.5	34.7	0.81781
17.1	16	0.76309		2	35.2	0.82186
0.6	16.1	0.76584		213.9	37.2	0.82591
8.9	16.5	0.7686		13.2	37.5	0.82996
5.3	16.7	0.77135		1.7	38.6	0.83401
1.8	16.9	0.7741		25.3	39.6	0.83806
3.9	16.9	0.77686		0.7	40.4	0.84211
17.5	17	0.77961		17.7	41.3	0.84615
1	17.1	0.78237		13.5	42.5	0.8502
0.4	17.3	0.78788		19.4	43.4	0.85425
8.8	17.5	0.79063		19	45.2	0.8583
9.6	17.7	0.79339		7.9	48.5	0.8664
3.5	17.8	0.79614		7.4	52.1	0.87045
40.6	18	0.7989		0.9	53.7	0.87449
25.8	18.4	0.80441		7.6	57.3	0.87854
0.4	18.7	0.80716		12.3	60.2	0.88259
3.7	18.8	0.80992		0.4	62.1	0.88664
34.2	19.4	0.81267		217.8	63	0.89069
24.3	20	0.81543		13.3	69.9	0.89474
2.5	20.5	0.81818		4.2	73.1	0.89879
8.7	20.6	0.82094		0.2	74.6	0.90283
4	20.7	0.82369		2.1	77	0.90688
5.6	21	0.8292		26.1	81	0.91093
9.6	21.1	0.83196		3.2	82.5	0.91498
9.1	21.7	0.83471		3.3	82.7	0.91903
54.9	22.1	0.83747		15.3	87.4	0.92308
39	22.5	0.84022		41.3	95.2	0.92713
10.2	22.6	0.84298		1.6	96.2	0.93117
11.7	23	0.84573		1.6	98.5	0.93522
5.8	23.3	0.84848		1.8	109.4	0.93927
2.1	23.5	0.85124		1.4	110	0.94332
5.7	24.1	0.85399		60.2	111.1	0.94737
7.5	24.3	0.85675		0.8	119.3	0.95142
4.6	24.6	0.8595		63	122.2	0.95547
4.8	24.6	0.86226		11.9	124.1	0.95951
1.8	24.7	0.86777		261.1	135.1	0.96356
18.7	24.9	0.87052		12.9	140.4	0.96761
25.3	24.9	0.87328		31.1	160.5	0.97166
3.4	25	0.87603		11.9	169.9	0.97571
2.7	25.1	0.87879		14.8	179.5	0.97976
36.7	25.3	0.88154		10.3	192.1	0.98381
0.7	25.8	0.8843		192.1	213.9	0.98785
7.8	27.1	0.88705		32	217.8	0.9919
3.1	27.2	0.88981		22	261.1	0.99595
4.7	27.3	0.89256		5.4	262.2	1
12	28.7	0.89532		22.9
6.4	28.8	0.89807		1.2
9	29.9	0.90083		1.6
5.6	30.1	0.90358		3
36	30.9	0.90634		7.4
15.9	32.1	0.90909		16.4
263.9	33.1	0.91185		23.3
33.8	33.4	0.9146		119.3
16.5	33.8	0.91736		40.4
2.2	34.2	0.92011		5.1
2.8	34.8	0.92287		135.1
14.2	35.3	0.92562		95.2
2.5	35.4	0.92837		6.2
3.1	35.5	0.93113		21.7
5.4	36	0.93388		8.3
13.5	36.7	0.93664		27.7
59.1	37.2	0.93939		5.4
3.2	39	0.94215		19.2
103	39.6	0.9449		9
28.7	40.6	0.94766		18.4
28.8	41.6	0.95041		20
0.8	42	0.95317		2.7
24.9	44	0.95592		7.4
2.6	44.9	0.95868		25.3
32.1	45.3	0.96143		73.1
5.9	47.1	0.96419		4.1
7.1	54.9	0.96694		6.1
5.9	55.6	0.9697		9.6
1.8	58.7	0.97245		0.3
1.5	59.1	0.97521		17
18.8	59.7	0.97796		23.3
2.7	69.1	0.98072		7.5
2	72	0.98347		140.4
4.1	74.9	0.98623
1.5	103	0.98898
24.7	119.2	0.99174
5.7	225.2	0.99449
1.9	263.9	0.99725
1.3	341.3	1
10.6
0.8
6.1
0.4
1.3
7.5
24.6
341.3
59.7
11.1
4
0.7
14.8
0.9
4.9
20
1.1
0.3
8.8
6.8
2.3
5.6
4.4
9
0.4
4.4
25
18.4
0.9
7.4
27.1
1.5
4.8
2.3
17.3
0.2
3.2
23.3
3.2
3.9
7.5
16.1
1.2
4.2
1.4
0.6
3.2
225.2
6.6
35.5
23.5
35.4
2.3
0.6
34.8
33.4
0.6
27.2
3.5
16.9
0.5
13.7
10.3
7.8
6.3
8.4
1.4
22.1
0.5
4.6
20.5
23
55.6
1.4
74.9
44
42
1.7
3.4
3.4
1.6
0.2
6.6
24.9
33.1
2.2
2.9
0.4
1.4
0.9
9.8
3.5
0.7
20.7
17
10.2
5.5
4.3
0.8
0.7
22.6
1.3
4.5
10.7
3.5
11
15.6
8.9
4.8
1.9
