# Supplementary material for: Real-time observation of signal recognition particle binding to actively translating ribosomes
Source: eLife. 2014 Oct 30;3:e04418. doi: 10.7554/eLife.04418 (PMC4213662; doi:10.7554/eLife.04418)
Supplement: Figure 3—source data 1. — Source data for Figure 3 (including figure supplements). DOI: http://dx.doi.org/10.7554/eLife.04418.011 [file elife04418s003.xlsx]

## Sheet: Fig3C
cWT					cMT
RAW	x_coord	y_coord (total events)	y_coord (prop)		RAW	x_coord	y_coord (total events)
78.195	0	0	0		8.9901	0	0
51.766	1	0	0		20.911	1	0
52.5	2	0	0		35.772	2	0
66.587	3	0	0		24.993	3	1
52.924	4	0	0		41.779	4	0
54.128	5	0	0		3.4942	5	0
51.906	6	0	0		15.115	6	0
42.956	7	0	0		49.504	7	1
28.86	8	0	0		21.641	8	1
54.613	9	0	0		22.135	9	0
53.632	10	1	0.0018762		51.536	10	0
49.473	11	1	0.0018762		70.569	11	0
57.583	12	0	0		24.481	12	0
51.747	13	0	0		24.866	13	0
50.179	14	0	0		51.994	14	0
46.66	15	0	0		7.5976	15	1
48.44	16	0	0			16	0
51.689	17	0	0			17	0
51.761	18	0	0			18	0
69.29	19	2	0.0037523			19	0
53.838	20	1	0.0018762			20	1
60.03	21	1	0.0018762			21	1
53.934	22	3	0.0056285			22	1
51.08	23	5	0.0093809			23	0
52.072	24	6	0.011257			24	3
51.545	25	1	0.0018762			25	0
76.49	26	2	0.0037523			26	0
59.889	27	1	0.0018762			27	0
53.103	28	3	0.0056285			28	0
73.025	29	2	0.0037523			29	0
59.052	30	1	0.0018762			30	0
54.508	31	2	0.0037523			31	0
52.282	32	1	0.0018762			32	0
45.203	33	3	0.0056285			33	0
31.025	34	0	0			34	0
46.145	35	3	0.0056285			35	1
44.395	36	2	0.0037523			36	0
45.615	37	2	0.0037523			37	0
83.933	38	5	0.0093809			38	0
70.924	39	6	0.011257			39	0
46.529	40	3	0.0056285			40	0
79.049	41	8	0.015009			41	1
54.202	42	6	0.011257			42	0
80.919	43	7	0.013133			43	0
50.814	44	8	0.015009			44	0
43.44	45	11	0.020638			45	0
30.088	46	19	0.035647			46	0
54.257	47	13	0.02439			47	0
54.086	48	27	0.050657			48	0
50.917	49	39	0.073171			49	1
51.781	50	34	0.06379			50	0
49.444	51	41	0.076923			51	2
50.714	52	40	0.075047			52	0
51.504	53	55	0.10319			53	0
49.669	54	44	0.082552			54	0
49.491	55	14	0.026266			55	0
59.069	56	7	0.013133			56	0
38.364	57	6	0.011257			57	0
60.482	58	5	0.0093809			58	0
80.971	59	9	0.016886			59	0
49.381	60	4	0.0075047			60	0
51.396	61	3	0.0056285			61	0
31.673	62	1	0.0018762			62	0
53.108	63	2	0.0037523			63	0
83.608	64	1	0.0018762			64	0
53.078	65	0	0			65	0
41.544	66	2	0.0037523			66	0
42.41	67	0	0			67	0
49.115	68	2	0.0037523			68	0
75.675	69	3	0.0056285			69	0
44.111	70	1	0.0018762			70	1
55.521	71	4	0.0075047			71	0
46.855	72	1	0.0018762			72	0
50.324	73	4	0.0075047			73	0
52.301	74	3	0.0056285			74	0
73.452	75	3	0.0056285			75	0
51.95	76	4	0.0075047			76	0
76.891	77	3	0.0056285			77	0
51.184	78	3	0.0056285			78	0
25.329	79	7	0.013133			79	0
33.639	80	6	0.011257			80	0
47.109	81	6	0.011257			81	0
68.865	82	1	0.0018762			82	0
71.16	83	6	0.011257			83	0
50.511	84	13	0.02439			84	0
53.156	85	0	0			85	0
51.496
47.471
51.836
53.921
68.703
50.212
53.085
49.028
54.774
50.113
56.453
64.146
48.782
54.382
39.137
49.479
51.674
56.418
53.342
50.88
53.879
42.038
52.503
39.94
77.191
79.304
53.346
48.507
83.211
53.451
44.581
45.4
77.985
53.021
53.547
52.859
52.115
59.599
84.383
54.17
55.846
40.969
54.684
50.014
76.122
48.41
50.041
52.661
50.05
48.067
46.906
48.478
24.586
51.328
46.955
50.576
54.287
53.838
29.839
54.874
39.259
41.683
45.966
52.139
52.039
55.278
52.72
72.652
52.851
26.349
51.908
55.364
81.939
52.561
52.16
66.013
52.193
54.679
53.664
59.787
54.798
47.904
55.5
48.804
51.988
50.242
58.296
50.168
84.739
54.396
46.938
53.939
51.624
23.755
53.922
50.691
52.088
54.856
51.359
54.705
50.27
54.381
57.275
49.197
54.643
58.85
52.327
61.453
79.034
48.975
54.568
78.558
49.027
46.054
52.553
46.031
49.893
53.862
49.644
47.226
46.238
50.901
84.063
53.56
41.275
49.507
54.737
84.657
50.008
51.742
49.103
47.398
48.135
38.745
51.7
49.28
53.279
54.455
50.929
52.689
38.994
54.416
49.589
50.272
48.251
53.405
40.598
45.05
53.17
45.375
52.612
23.046
52.404
51.293
79.97
53.417
54.209
50.368
61.114
24.103
63.444
55.057
82.865
55.863
53.474
49.899
22.958
48.316
55.059
39.591
53.967
51.25
54.614
51.153
50.833
35.628
46.86
45.873
22.859
79.155
24.364
49.63
73.872
43.88
54.588
83.259
24.807
53.709
46.386
51.104
77.327
52.98
43.146
35.773
46.607
80.567
51.901
52.83
44.107
49.721
48.426
55.676
32.35
53.7
54.191
79.83
24.378
59.974
33.926
42.656
73.463
49.77
47.757
53.993
47.357
53.902
53.63
58.737
45.75
75.9
45.816
43.506
56.817
81.043
21.84
54.531
54.099
52.603
69.53
53.239
58.437
52.911
48.656
53.209
71.861
53.546
53.575
54.055
40.547
59.837
51.894
56.418
51.24
50.846
10.852
52.537
84.001
53.672
74.91
54.129
54.842
53.585
28.594
45.639
23.765
50.415
58.175
44.917
84.573
48.897
33.976
54.403
74.208
53.126
49.902
48.746
56.963
80.218
35.777
48.27
49.996
47.845
84.568
55.229
57.757
74.305
50.08
49.991
54.084
80.531
53.714
61.92
69.73
81.726
49.955
51.447
53.926
52.82
53.54
84.355
41.852
52.226
52.664
53.567
47.745
51.725
19.52
46.176
42.681
48.495
54.71
50.319
75.615
23.676
49.167
27.506
52.31
54.838
53.582
51.456
49.641
23.144
53.912
53.94
43.75
76.449
50.44
51.838
44.087
47.017
47.098
37.958
50.042
52.842
49.451
54.011
48.917
60.93
53.886
51.312
41.662
48.631
62.176
49.495
84.411
51.713
43.589
41.383
50.64
52.712
46.455
53.855
57.517
59.158
46.026
48.141
57.758
52.186
54.455
42.563
80.587
54.212
50.105
53.571
81.572
39.862
50.428
54.528
48.182
47.881
49.38
53.794
55.619
78.933
55.915
46.557
45.391
49.175
54.692
56.042
81.601
26.596
38.094
51.665
56.484
53.644
48.47
52.93
83.907
43.43
38.415
57.893
49.143
19.772
84.678
49.471
49.073
49.995
49.867
59.616
84.562
41.343
52.341
52.011
36.19
55.701
48.621
11.589
29.209
71.463
71.81
63.778
84.17
41.388
50.836
81.927
47.331
48.348
51.4
22.154
49.43
46.631
51.313
50.14
24.86
53.531
44.855
44.187
52.01
54.486
51.584
49.059
46.471
53.92
49.691
79.928
55.356
51.737
54.713
83.682
53.952
52.184
52.074
48.407
49.683
84.641
51.844
28.359
53.735
37.941
48.745
48.155
54.929
39.319
36.866
20.579
60.118

## Sheet: Fig3D
x_coord	y_coord		Single exponential fits
78.195	4.1		aa range	lifetime (s)	+/- 95% fit confidence interval
81.421	4.4		40-50	34.7	4.1
83.429	238.2		50-60	74.4	5
66.587	128		60-70	37.8	3.5
51.906	81		70-80	25	2.1
53.632	483.1		80-85	28.2	2.8
57.583	0.89999
58.541	40.8
51.747	107
73.846	4.1
69.29	0.8
72.344	12.1
60.03	532.1
53.934	1.4
54.454	73.9
79.053	222.1
51.08	283.6
52.072	2.7
54.213	575.4
51.545	80.5
76.49	32.2
59.889	24.6
73.025	0.29999
80.929	0.29999
81.353	0.80005
81.748	0.69995
83.601	62
59.052	7.1
60.888	0.39999
61.77	2.4
62.643	1.8
64.498	0.29999
67.859	0.5
69.062	16.5
72.021	1.9
72.954	20.2
75.792	98.8
54.508	3.2
55.195	1.1
55.342	0.39999
55.996	0.80002
56.521	2.7
56.912	429.2
46.145	3.3
47.824	2.9
53.053	477.3
44.395	570.7
83.933	1
70.924	5.6
73.739	14.6
83.55	21.7
79.049	0.29999
83.805	17.6
80.919	26.1
54.257	486.3
54.086	300.9
51.781	0.39996
52.788	0.20001
55.148	82.5
49.444	7.7
53.154	136
51.504	0.10001
53.163	0.29999
53.635	2.4
53.983	2
55.37	7.4
60.548	5.1
66.959	7.8
75.712	0.29999
80.89	4.3
84.63	2.3
49.491	95.4
59.069	322.7
60.482	43.4
80.971	2
51.396	1.6
52.56	0.89996
71.718	5.3
84.505	1.8
83.608	1.1
41.544	0.29999
57.081	180
42.41	0.5
48.924	8.7
49.976	21.4
52.774	0.39996
52.948	153.7
49.115	1.2
53.939	51
64.027	164.7
75.675	0.30005
76.158	0.1
55.521	14.4
58.631	13.1
62.188	7.5
64.888	227.2
50.324	0.19995
55.382	198.6
73.452	5
76.59	1.4
80.682	4.7
51.95	2.5
54.775	89.2
76.891	2.1
83.858	3.9
51.184	497.6
68.865	3.9
69.714	37.8
78.397	6.2
80.009	0.5
71.16	8.5
53.156	1.9
53.543	3.2
55.892	7.5
58.568	9.9
66.748	38.3
76.255	0.40002
47.471	0.39999
56.926	14.6
70.233	147.9
56.453	268.7
64.146	1.8
66.996	0.60001
67.922	203.3
54.382	134.2
56.418	3.9
57.324	7
60.836	2.8
67.185	8.3
69.116	10.2
70.753	2.2
72.291	25.6
75.16	0.20001
78.367	0.80005
78.651	22.9
83.233	5.7
84.367	82.4
50.88	0.39999
55.827	0.79999
78.425	1.4
83.215	1.1
42.038	26.5
49.623	61
52.503	0.60001
69.537	3.1
72.048	3.8
79.714	0.099976
77.191	5.7
79.543	3.2
82.381	3.1
79.304	0.5
80.372	3.6
53.346	0.30002
64.118	0.19998
67.251	8.9
83.211	33.2
77.985	1.9
78.605	11.3
84.385	9.9
53.021	104.9
53.547	1.6
53.696	3.2
54.202	13.8
59.599	130.5
84.383	42.5
55.846	152.1
76.122	289.2
50.041	0.20001
52.404	17.3
46.906	14.7
54.701	4
70.022	0.5
71.097	20.1
83.209	94.2
51.328	0.40002
52.508	118.1
53.838	0.20001
29.839	0.19998
31.196	1
32.658	0.60001
34.136	1.3
36.216	1.3
37.829	0.5
41.839	3.6
49.166	5
75.654	0.40002
39.259	0.19998
44.103	1.4
47.904	2.6
48.276	4.5
52.035	0.29999
72.652	21.7
76.133	4.7
77.065	1.4
77.365	8.7
78.588	10.8
80.483	19.5
51.908	9.9
53.019	103.9
83.03	173.9
55.364	0.29999
55.903	119.9
75.806	50.7
81.939	6.8
83.799	1.3
66.013	1.5
53.664	0.5
62.292	136.8
59.787	116.8
54.798	0.5
55.596	6.5
60.617	53.1
77.469	37.3
55.5	138.7
77.494	62.9
58.296	3.5
50.168	2.3
50.996	1.2
54.428	2.8
81.828	1.7
82.987	2.4
84.739	14
54.396	1.8
56.542	1.1
57.554	0.59998
58.167	2.6
72.396	64.5
54.856	398.6
54.705	209.7
57.275	59.5
58.85	0.39999
59.413	19.8
61.453	1
62.103	14.1
66.474	18.1
71.756	9.7
75.035	41.7
78.558	0.20001
84.051	24.6
84.063	86.2
53.56	95.3
49.507	2.1
84.657	208.8
51.7	0.5
52.566	0.19998
53.385	0.40002
54.157	0.20001
54.525	0.70001
56.788	11.9
60.27	5.7
61.7	4.3
63.206	11.5
66.217	5.8
68.061	5.1
70.414	6.9
72.07	9.2
73.952	0.5
75.251	0.70001
76.455	2.8
77.208	54.5
54.455	6.2
60.381	141.2
53.405	15.4
57.009	87.3
45.05	0.8
73.936	54.8
45.375	1
47.944	7.7
50.291	7.7
56.366	0.39999
52.612	143.4
52.404	29.6
79.97	75.9
63.444	1.8
64.281	125.5
81.837	24
55.057	264.3
82.865	15.5
84.493	48.1
55.863	191.1
55.059	1.4
55.527	16
60.222	15.7
62.728	1
63.138	0.1
63.665	28.4
69.567	5.1
70.749	0.90002
71.194	44.1
76.429	36.9
81.112	6
83.396	1.3
39.591	0.30002
40.639	9.8
43.595	8.6
49.717	0.40002
50.166	14.2
58.306	60.1
69.858	61
50.833	0.20001
51.641	0.89996
52.802	1.6
53.777	5.7
56.31	0.5
63.01	167.6
46.86	6.1
53.818	225
79.155	0.20001
80.506	0.29999
80.838	0.30002
83.021	0.59998
84.297	0.19998
49.63	2.5
51.11	4.7
52.918	57.6
73.872	12.7
54.588	3.3
55.394	342
83.259	32.2
24.807	325.6
77.327	0.70001
84.821	56.9
52.98	5.6
43.146	157
80.567	0.30002
81.692	0.30002
82.193	0.10001
55.676	340.3
79.83	1.3
81.176	1
81.734	37.8
59.974	0.29999
72.897	111.6
33.926	0.3
38.68	41.1
43.099	21.9
48.636	81.8
73.463	0.60001
79.081	3.8
47.357	0.69998
48.568	1.4
48.797	1
50.625	0.5
54.863	19.4
58.737	0.5
67.133	83.4
75.9	0.29999
80.353	0.29999
56.817	13.5
63.543	3.7
65.501	3.1
66.504	1.2
66.731	4.9
68.211	6.7
72.204	60.1
79.628	4.2
82.792	2.1
81.043	3.1
54.099	47.9
64.607	287.4
52.603	14.4
69.971	25.5
69.53	2.7
58.437	0.89999
58.946	265.5
48.656	4.9
51.22	136.8
53.209	0.70001
55.011	0.20001
55.949	1.5
56.655	0.30002
62.442	0.30002
62.79	0.10001
63.169	1.7
63.602	0.60001
63.981	0.10001
64.666	0.39999
66.237	0.30002
68.693	1.3
69.125	0.69998
69.515	0.5
72.066	1.8
73.5	0.29999
74.027	3.3
74.902	1.5
76.567	0.20001
76.989	0.5
77.316	0.19995
77.569	0.10004
77.674	2.6
78.106	1
78.422	1.4
79.519	1.2
80.562	0.099976
81.311	2.8
82.006	0.79999
83.914	2.5
84.452	0.5
71.861	14.9
73.834	19.8
76.259	9.6
78.818	52.4
84	65.6
53.546	0.099976
61.572	5.8
68.144	3.2
73.521	119.8
54.055	233.3
40.547	1.7
43.916	235.7
56.418	20.2
61.867	3.2
64.464	8.4
68.606	2.9
69.164	1.6
69.642	227.7
51.24	28.9
54.605	0.30002
84.001	25.3
74.91	0.29999
53.585	0.29999
54.015	0.29999
54.678	1.7
55.488	25.1
58.175	23.8
63.053	0.39999
70.378	224.4
44.917	57.5
49.76	2.1
51.409	1.8
52.703	304
84.573	0.29999
84.686	1.1
54.403	248.2
74.208	3.5
78.575	0.89999
80.995	4.4
84.095	0.79999
56.963	40.8
64.011	8.9
65.255	4.6
66.643	32.3
68.769	1.8
69.003	19.8
72.947	24.2
75.212	0.20001
75.339	6.2
76.645	4.4
79.933	8.5
80.867	19.6
82.684	5.7
80.218	0.39999
84.467	35.1
84.568	2.4
55.229	314.3
57.757	190.3
74.305	4.1
78.306	3
80.531	0.39999
61.92	12.4
65.333	27.4
71.933	67.4
84.84	43.8
69.73	10.8
82.155	214.3
81.726	13
49.955	2.1
54.264	15.2
60.863	75.1
84.355	64.4
52.664	1.8
54.168	366
51.725	0.60001
53.838	186.1
48.495	19.9
55.289	16.8
56.28	417.6
50.319	6.8
54.353	62.1
75.615	1.8
75.882	1.6
78.089	0.39999
78.548	3.5
79.412	5
76.449	0.30002
78.762	0.29999
51.838	2.7
54.18	234.8
49.451	4.7
54.445	616.2
60.93	2.1
61.528	1
70.449	2.4
72.912	296.1
62.176	329
84.411	130.1
50.64	0.19998
53.296	1.2
59.486	93.6
46.455	7
48.227	4.9
49.083	9.4
50.855	1.5
51.422	1.5
55.113	391.4
57.517	143
59.158	2.7
57.758	5.6
58.814	0.89999
59.163	21.2
61.161	3.5
62.042	0.5
62.301	1.5
63.258	12.8
64.344	9.1
65.195	7.9
66.053	15.1
68.5	2.1
70.292	31.6
79.561	0.90002
80.761	24
82.858	8.3
42.563	137.1
79.639	3.7
81.351	42.4
80.587	0.79999
81.572	0.5
84.954	0.30002
39.862	1.3
40.324	0.39999
41.637	14.7
43.874	3.1
45.355	13.1
48.559	68.4
53.462	217.1
54.528	51.3
48.182	139.9
55.619	0.39999
56.405	0.29999
56.676	0.60001
57.385	3.3
58.893	0.5
59.229	0.89999
60.905	13
64.837	2
66.036	215
78.933	79
55.915	1.2
58.295	149.1
46.557	0.30002
54.827	3.8
61.944	2
69.126	2.1
71.001	25.8
75.371	163.6
45.391	3.7
46.768	1.4
48.701	1.6
52.012	148.8
56.042	0.3
82.275	0.89999
84.628	36.2
81.601	1
82.262	42.9
26.596	1.6
27.082	6.1
28.663	111
45.684	207.6
56.484	155.9
48.47	1.3
49.498	0.1
49.566	254.8
83.907	128.7
57.893	1.4
67.589	1.4
68.875	0.39999
79.429	3.9
82.964	3.6
49.143	6.1
49.961	11.3
51.636	4.6
52.274	73.7
84.678	144.7
49.867	3.8
51.933	0.39999
53.63	0.10001
56.014	0.19998
58.36	97.1
59.616	1
62.611	9.7
64.55	0.40002
66.546	5.8
68.452	8.4
75.223	4.2
55.701	32.3
63.254	58.4
73.645	11.6
78.148	0.20001
78.779	235.4
71.463	5.8
72.039	137.9
71.81	0.29999
71.902	0.1
72.629	0.69995
73.655	0.60004
73.77	1.2
74.854	1
76.018	0.5
81.968	3.7
82.752	0.099976
82.844	1.3
83.859	1.1
63.778	12.2
67.988	3.5
75.088	0.29999
79.795	7.9
81.396	9.1
84.177	67.9
84.17	211.7
50.836	7.7
55	13.1
61.041	62.6
81.927	0.3
82.797	7.5
51.4	0.60001
53.195	1.3
54.736	2.5
55.074	6.8
57.094	0.89999
58.169	0.20001
59.262	0.30002
61.319	2.1
62.931	100.9
83.555	133.7
46.631	2.7
49.175	0.60001
62.374	270.5
44.187	0.39999
45.096	3.9
48.126	44.2
54.486	180.2
49.059	1.5
53.92	64.4
49.691	8.3
53.942	505.9
79.928	10.6
55.356	396.4
83.682	0.5
84.503	0.70001
84.808	14.2
84.641	1.6
28.359	0.39999
52.78	0.20001
70.848	2
73.129	1.5
74.825	30.7
48.745	49.1
64.2	4.5
60.118	19.8
66.564	78.2

## Sheet: Fig3E
cWT
aa translated	total RNCs bound by SRP	Percent RNCS bound by SRP			Individual RNCs (0 unbound, 1 bound)
0	0	0			0	0	0	0	0	0	0	0	0	0	0	0	0	0	0	0	0	0	0	0	0	0	0	0	0	0	0	0	0	0	0	0	0	0	0	0	0	0	0	0	0	0	0	0	0
1	0	0			0	0	0	0	0	0	0	0	0	0	0	0	0	0	0	0	0	0	0	0	0	0	0	0	0	0	0	0	0	0	0	0	0	0	0	0	0	0	0	0	0	0	0	0	0
2	0	0			0	0	0	0	0	0	0	0	0	0	0	0	0	0	0	0	0	0	0	0	0	0	0	0	0	0	0	0	0	0	0	0	0	0	0	0	0	0	0	0	0	0	0	0	0
3	0	0			0	0	0	0	0	0	0	0	0	0	0	0	0	0	0	0	0	0	0	0	0	0	0	0	0	0	0	0	0	0	0	0	0	0	0	0	0	0	0	0	0	0	0	0	0
4	0	0			0	0	0	0	0	0	0	0	0	0	0	0	0	0	0	0	0	0	0	0	0	0	0	0	0	0	0	0	0	0	0	0	0	0	0	0	0	0	0	0	0	0	0	0	0
5	0	0			0	0	0	0	0	0	0	0	0	0	0	0	0	0	0	0	0	0	0	0	0	0	0	0	0	0	0	0	0	0	0	0	0	0	0	0	0	0	0	0	0	0	0	0	0
6	0	0			0	0	0	0	0	0	0	0	0	0	0	0	0	0	0	0	0	0	0	0	0	0	0	0	0	0	0	0	0	0	0	0	0	0	0	0	0	0	0	0	0	0	0	0	0
7	0	0			0	0	0	0	0	0	0	0	0	0	0	0	0	0	0	0	0	0	0	0	0	0	0	0	0	0	0	0	0	0	0	0	0	0	0	0	0	0	0	0	0	0	0	0	0
8	0	0			0	0	0	0	0	0	0	0	0	0	0	0	0	0	0	0	0	0	0	0	0	0	0	0	0	0	0	0	0	0	0	0	0	0	0	0	0	0	0	0	0	0	0	0	0
9	0	0			0	0	0	0	0	0	0	0	0	0	0	0	0	0	0	0	0	0	0	0	0	0	0	0	0	0	0	0	0	0	0	0	0	0	0	0	0	0	0	0	0	0	0	0	0
10	0	0			0	0	0	0	0	0	0	0	0	0	0	0	0	0	0	0	0	0	0	0	0	0	0	0	0	0	0	0	0	0	0	0	0	0	0	0	0	0	0	0	0	0	0	0	0
11	0	0			0	0	0	0	0	0	0	0	0	0	0	0	0	0	0	0	0	0	0	0	0	0	0	0	0	0	0	0	0	0	0	0	0	0	0	0	0	0	0	0	0	0	0	0	0
12	0	0			0	0	0	0	0	0	0	0	0	0	0	0	0	0	0	0	0	0	0	0	0	0	0	0	0	0	0	0	0	0	0	0	0	0	0	0	0	0	0	0	0	0	0	0	0
13	0	0			0	0	0	0	0	0	0	0	0	0	0	0	0	0	0	0	0	0	0	0	0	0	0	0	0	0	0	0	0	0	0	0	0	0	0	0	0	0	0	0	0	0	0	0	0
14	0	0			0	0	0	0	0	0	0	0	0	0	0	0	0	0	0	0	0	0	0	0	0	0	0	0	0	0	0	0	0	0	0	0	0	0	0	0	0	0	0	0	0	0	0	0	0
15	0	0			0	0	0	0	0	0	0	0	0	0	0	0	0	0	0	0	0	0	0	0	0	0	0	0	0	0	0	0	0	0	0	0	0	0	0	0	0	0	0	0	0	0	0	0	0
16	0	0			0	0	0	0	0	0	0	0	0	0	0	0	0	0	0	0	0	0	0	0	0	0	0	0	0	0	0	0	0	0	0	0	0	0	0	0	0	0	0	0	0	0	0	0	0
17	0	0			0	0	0	0	0	0	0	0	0	0	0	0	0	0	0	0	0	0	0	0	0	0	0	0	0	0	0	0	0	0	0	0	0	0	0	0	0	0	0	0	0	0	0	0	0
18	0	0			0	0	0	0	0	0	0	0	0	0	0	0	0	0	0	0	0	0	0	0	0	0	0	0	0	0	0	0	0	0	0	0	0	0	0	0	0	0	0	0	0	0	0	0	0
19	0	0			0	0	0	0	0	0	0	0	0	0	0	0	0	0	0	0	0	0	0	0	0	0	0	0	0	0	0	0	0	0	0	0	0	0	0	0	0	0	0	0	0	0	0	0	0
20	0	0			0	0	0	0	0	0	0	0	0	0	0	0	0	0	0	0	0	0	0	0	0	0	0	0	0	0	0	0	0	0	0	0	0	0	0	0	0	0	0	0	0	0	0	0	0
21	0	0			0	0	0	0	0	0	0	0	0	0	0	0	0	0	0	0	0	0	0	0	0	0	0	0	0	0	0	0	0	0	0	0	0	0	0	0	0	0	0	0	0	0	0	0	0
22	0	0			0	0	0	0	0	0	0	0	0	0	0	0	0	0	0	0	0	0	0	0	0	0	0	0	0	0	0	0	0	0	0	0	0	0	0	0	0	0	0	0	0	0	0	0	0
23	0	0			0	0	0	0	0	0	0	0	0	0	0	0	0	0	0	0	0	0	0	0	0	0	0	0	0	0	0	0	0	0	0	0	0	0	0	0	0	0	0	0	0	0	0	0	0
24	0	0			0	0	0	0	0	0	0	0	0	0	0	0	0	0	0	0	0	0	0	0	0	0	0	0	0	0	0	0	0	0	0	0	0	0	0	0	0	0	0	0	0	0	0	0	0
25	1	0.0041667			0	0	0	0	0	0	0	0	0	0	0	0	0	0	0	0	0	0	0	0	0	0	0	0	0	0	0	0	0	0	0	0	0	0	0	0	0	0	0	0	0	0	0	0	0
26	1	0.0041667			0	0	0	0	0	0	0	0	0	0	0	0	0	0	0	0	0	0	0	0	0	0	0	0	0	0	0	0	0	0	0	0	0	0	0	0	0	0	0	0	0	0	0	0	0
27	2	0.0083333			0	0	0	0	0	0	0	0	0	0	0	0	0	0	0	0	0	0	0	0	0	0	0	0	0	0	0	0	0	0	0	0	0	0	0	0	0	0	0	0	0	0	0	0	0
28	3	0.0125			0	0	0	0	0	0	0	0	0	0	0	0	0	0	0	0	0	0	0	0	0	0	0	0	0	0	0	0	0	0	0	0	0	0	0	0	0	0	0	0	0	0	0	0	0
29	3	0.0125			0	0	0	0	0	0	0	0	0	0	0	0	0	0	0	0	0	0	0	0	0	0	0	0	0	0	0	0	0	0	0	0	0	0	0	0	0	0	0	0	0	0	0	0	0
30	4	0.016667			0	0	0	0	0	0	0	0	0	0	0	0	0	0	0	0	0	0	0	0	0	0	0	0	0	0	0	0	0	0	0	0	0	0	0	0	0	0	0	0	0	0	0	0	0
31	4	0.016667			0	0	0	0	0	0	0	0	0	0	0	0	0	0	0	0	0	0	0	0	0	0	0	0	0	0	0	0	0	0	0	0	0	0	0	0	0	0	0	0	0	0	0	0	0
32	4	0.016667			0	0	0	0	0	0	0	0	0	0	0	0	0	0	0	0	0	0	0	0	0	0	0	0	0	0	0	0	0	0	0	0	0	0	0	0	0	0	0	0	0	0	0	0	0
33	3	0.0125			0	0	0	0	0	0	0	0	0	0	0	0	0	0	0	0	0	0	0	0	0	0	0	0	0	0	0	0	0	0	0	0	0	0	0	0	0	0	0	0	0	0	0	0	0
34	4	0.016667			0	0	0	0	0	0	0	0	0	0	0	0	0	0	0	0	0	0	0	0	0	0	0	0	0	0	0	0	0	0	0	0	0	0	0	0	0	0	0	0	0	0	0	0	0
35	4	0.016667			0	0	0	0	0	0	0	0	0	0	0	0	0	0	0	0	0	0	0	0	0	0	0	0	0	0	0	0	0	0	0	0	0	0	0	0	0	0	0	0	0	0	0	0	0
36	4	0.016667			0	0	0	0	0	0	0	0	0	0	0	0	0	0	0	0	0	0	0	0	0	0	0	0	0	0	0	0	0	0	0	0	0	0	0	0	0	0	0	0	0	0	0	0	0
37	4	0.016667			0	0	0	0	0	0	0	0	0	0	0	0	0	0	0	0	0	0	0	0	0	0	0	0	0	0	0	0	0	0	0	0	0	0	0	0	0	0	0	0	0	0	0	0	0
38	3	0.0125			0	0	0	0	0	0	0	0	0	0	0	0	0	0	0	0	0	0	0	0	0	0	0	0	0	0	0	0	0	0	0	0	0	0	0	0	0	0	0	0	0	0	0	0	0
39	5	0.020833			0	0	0	0	0	0	0	0	0	0	0	0	0	0	0	0	0	0	0	0	0	0	0	0	0	0	0	0	0	0	0	0	0	0	0	0	0	0	0	0	0	0	0	0	0
40	7	0.029167			0	0	0	0	0	0	0	0	0	0	0	0	0	0	0	0	0	0	0	0	0	0	0	0	0	0	0	0	0	0	0	0	0	0	0	0	0	0	0	0	0	0	0	0	0
41	8	0.033333			0	0	0	0	0	0	0	0	0	0	0	0	0	0	0	0	0	0	0	0	0	0	0	0	0	0	0	0	0	0	0	0	0	0	0	0	0	0	0	0	0	0	0	0	0
42	11	0.045833			0	0	0	0	0	0	0	0	0	0	0	0	0	0	0	0	0	0	0	0	0	0	0	0	0	0	0	0	0	0	0	0	0	0	0	0	0	1	1	0	0	0	0	0	0
43	12	0.05			0	0	0	0	0	0	0	0	0	0	0	0	0	0	0	0	0	0	0	0	0	0	0	0	0	0	0	0	0	0	0	0	0	0	0	0	0	1	1	0	0	0	0	0	0
44	15	0.0625			0	0	0	0	0	0	0	0	0	0	0	0	0	0	0	0	0	0	0	0	1	0	0	0	0	0	0	0	0	0	0	0	0	0	0	0	0	1	1	0	0	0	0	0	0
45	19	0.079167			0	0	0	0	0	0	0	0	0	0	0	0	0	0	0	0	0	0	0	0	1	0	0	0	0	0	0	0	0	0	0	0	0	0	0	0	0	1	1	0	0	0	0	0	0
46	18	0.075			0	0	0	0	0	0	0	0	0	0	0	0	0	0	0	0	0	0	0	1	1	0	0	0	0	0	0	0	0	0	0	0	0	0	0	0	0	0	0	0	0	0	0	0	0
47	24	0.1			0	0	0	0	0	0	0	0	0	0	0	0	0	0	0	0	0	0	0	1	1	0	0	0	0	0	0	0	0	0	0	0	0	0	0	0	0	0	0	0	0	0	0	0	0
48	26	0.10833			0	0	0	0	0	0	0	0	0	0	0	0	0	0	0	0	0	0	0	1	1	0	0	0	0	0	0	0	0	0	0	0	0	0	0	0	0	0	0	0	0	0	0	0	0
49	35	0.14583			0	0	0	0	0	0	0	0	0	0	0	0	0	0	0	0	0	0	0	1	1	0	0	0	0	0	0	0	1	0	0	1	0	0	0	0	0	0	1	1	0	0	0	0	0
50	45	0.1875			0	0	0	0	0	0	0	0	0	0	0	0	0	0	0	0	0	0	0	1	1	0	0	0	0	0	0	0	1	0	0	1	0	0	0	0	0	0	1	1	0	0	1	0	0
51	54	0.225			0	0	0	0	0	0	0	0	0	0	1	0	0	0	0	0	0	0	0	1	1	0	0	0	0	0	0	0	1	0	0	1	0	0	0	1	0	0	1	1	0	0	1	0	0
52	64	0.26667			0	0	1	0	0	1	0	0	0	0	1	0	1	1	0	0	0	0	0	1	1	0	0	0	0	0	0	1	1	1	0	1	0	0	0	1	0	0	1	1	0	0	1	0	1
53	72	0.3			0	0	1	0	0	1	0	0	0	0	1	0	1	1	0	0	0	0	0	1	1	0	0	0	0	0	0	1	1	1	0	1	0	0	0	1	0	0	1	0	0	0	1	0	1
54	88	0.36667			0	0	1	1	0	1	0	0	0	1	1	0	1	1	0	0	0	0	0	1	1	0	0	0	0	1	1	1	1	1	0	1	0	0	0	1	0	0	1	1	0	0	0	0	1
55	102	0.425			0	0	1	1	0	1	0	0	0	1	1	0	1	1	0	0	0	0	1	1	1	0	0	0	0	1	1	1	1	1	0	1	0	0	0	1	0	0	1	1	0	0	1	0	1
56	113	0.47083			0	0	1	1	0	1	0	0	0	1	1	0	1	1	0	0	0	0	1	1	1	0	0	0	0	1	1	1	1	1	0	1	0	0	0	1	0	0	1	1	0	1	1	0	1
57	113	0.47083			0	0	1	1	0	1	0	0	0	1	1	0	1	1	0	0	0	0	1	1	1	0	0	0	0	1	1	1	1	1	0	1	0	0	0	0	0	1	1	1	0	1	1	0	1
58	118	0.49167			0	0	1	1	1	1	0	0	0	1	1	0	1	1	0	0	0	0	1	1	1	0	0	0	0	1	1	1	1	1	0	1	0	0	0	0	0	1	1	1	0	1	1	0	1
59	115	0.47917			0	0	1	1	1	1	0	0	0	1	1	0	1	1	0	0	0	1	1	1	1	0	0	0	0	1	1	1	1	1	0	1	1	0	0	0	0	1	1	1	0	1	1	0	1
60	120	0.5			0	0	1	1	1	1	0	1	0	1	1	0	1	1	0	1	0	1	1	1	1	0	0	0	0	1	1	1	1	1	0	1	1	1	0	0	0	1	1	1	0	1	1	0	1
61	121	0.50417			0	0	1	1	1	1	0	1	0	1	1	0	1	1	0	1	0	1	1	1	1	0	0	0	0	1	1	1	1	1	0	1	1	1	0	0	0	1	1	1	0	1	1	0	1
62	126	0.525			0	0	1	1	1	1	0	1	0	1	1	0	1	1	0	1	0	1	1	1	1	0	0	0	0	1	1	1	1	1	0	1	1	1	0	0	0	1	1	1	0	1	1	0	1
63	121	0.50417			0	0	1	1	1	1	0	1	0	1	1	0	1	1	0	1	0	1	1	1	1	0	0	0	0	1	1	1	1	1	0	1	1	1	0	0	0	1	1	1	0	1	1	0	1
64	122	0.50833			0	0	1	1	1	1	0	1	0	1	1	0	1	1	0	1	0	1	1	1	1	0	0	0	0	1	1	1	1	1	0	1	1	1	0	0	0	1	1	1	0	1	1	0	1
65	118	0.49167			0	0	1	1	1	1	0	1	0	1	1	0	1	1	0	1	0	1	1	1	1	0	0	0	0	1	1	1	1	1	0	1	1	1	0	0	0	1	1	1	0	1	1	0	1
66	117	0.4875			0	0	1	1	1	1	0	1	0	1	1	0	1	1	0	1	0	1	1	1	1	0	0	0	0	1	1	1	1	1	0	1	1	1	0	0	0	1	1	1	0	1	1	0	1
67	117	0.4875			0	1	1	1	0	0	0	1	0	1	1	0	1	1	0	1	0	1	1	1	1	0	0	0	0	1	1	1	1	1	0	1	1	1	0	0	0	1	1	1	0	1	1	0	1
68	116	0.48333			0	1	1	1	0	0	0	1	0	1	1	0	1	1	0	1	0	1	1	1	1	0	0	0	0	1	1	1	1	1	0	0	1	1	0	0	0	1	1	1	0	1	1	0	1
69	118	0.49167			0	1	1	1	0	0	1	1	0	1	1	0	1	1	0	1	0	1	1	1	1	0	0	0	0	1	1	1	1	1	0	0	1	1	0	0	0	1	1	1	0	1	1	0	1
70	122	0.50833			0	1	1	1	0	0	1	1	0	1	1	0	1	1	0	0	0	1	1	1	1	0	0	0	0	1	1	1	1	1	0	0	1	1	0	0	0	1	1	1	0	1	1	0	1
71	123	0.5125			0	1	1	1	0	0	1	1	0	1	1	0	1	1	0	0	0	1	1	1	1	0	1	0	0	1	1	0	1	1	0	0	1	1	0	0	0	1	1	1	0	1	1	0	1
72	126	0.525			0	1	1	1	0	0	1	1	0	1	1	0	1	1	0	0	0	1	1	1	1	0	1	0	0	1	1	0	1	1	0	0	1	1	0	1	0	1	1	1	0	1	1	0	1
73	128	0.53333			0	1	1	1	0	0	1	1	0	1	1	0	1	1	0	0	1	1	1	1	1	0	1	0	0	1	1	0	1	1	0	0	1	1	0	1	0	1	1	1	0	1	1	1	1
74	131	0.54583			0	1	0	1	0	1	1	1	0	1	1	0	1	1	0	0	1	1	1	1	1	0	1	0	0	1	1	0	1	0	0	0	1	1	0	1	0	1	1	1	0	1	1	1	1
75	131	0.54583			0	1	0	1	0	1	1	1	0	1	1	0	1	0	0	0	1	1	1	1	1	0	1	0	0	1	1	0	1	0	0	0	1	1	0	1	0	1	1	1	0	1	1	1	1
76	137	0.57083			0	1	0	1	0	1	1	1	0	1	1	0	1	0	1	0	1	1	1	1	1	0	1	0	0	1	1	0	1	1	0	0	1	1	0	1	0	1	1	1	1	1	1	1	1
77	136	0.56667			0	1	0	1	0	1	1	1	0	1	1	0	1	0	1	0	0	1	1	1	1	0	1	0	0	1	1	0	1	1	0	0	1	1	0	0	0	1	1	1	1	1	1	1	1
78	134	0.55833			1	1	0	1	0	0	0	1	0	1	1	0	1	0	1	0	0	1	1	1	1	0	1	0	0	1	1	0	0	1	0	0	1	1	0	0	0	1	1	1	1	1	1	1	0
79	137	0.57083			1	1	0	1	0	0	0	1	0	1	1	0	1	0	1	0	0	1	1	1	1	0	1	1	0	1	1	0	0	1	0	0	1	1	0	0	0	1	1	1	1	1	1	1	0
80	137	0.57083			1	1	0	1	0	0	0	1	0	1	1	0	1	0	1	0	0	1	1	1	1	0	1	1	0	1	1	0	0	0	0	0	1	1	0	0	0	1	1	1	0	1	1	1	0
81	142	0.59167			1	1	0	1	0	0	0	1	0	1	1	0	1	0	1	0	1	1	1	1	1	0	1	1	1	1	1	0	0	1	0	0	1	0	1	0	0	1	1	1	0	1	1	1	0
82	147	0.6125			1	1	0	1	0	0	0	1	0	1	1	0	1	0	1	0	1	1	1	1	1	0	0	1	1	1	1	0	0	1	0	0	1	0	1	0	0	1	1	1	0	1	1	1	0
83	145	0.60417			1	1	0	1	0	0	0	1	0	1	1	0	1	0	1	0	1	1	1	1	1	0	0	0	1	1	1	0	0	1	0	0	1	0	1	0	0	1	1	1	0	1	1	1	0
84	153	0.6375			1	0	0	1	0	0	0	1	0	1	1	0	1	0	1	0	1	1	1	1	1	1	1	1	1	1	1	0	0	1	0	0	1	0	1	0	1	1	1	1	0	1	1	1	0
85	156	0.65			1	0	0	1	0	0	0	1	0	1	1	0	1	0	1	0	1	1	1	1	1	1	1	1	1	1	1	0	0	1	0	0	1	0	1	1	1	1	1	1	0	1	1	1	0
86	150	0.625			1	0	0	1	0	0	0	1	0	1	1	0	1	0	0	0	1	1	1	1	1	1	1	1	1	1	1	0	0	1	0	0	1	0	0	1	1	1	1	1	0	1	1	0	0
87	139	0.57917			1	0	0	1	0	0	0	1	0	1	1	0	1	0	0	0	1	1	0	1	1	1	1	1	1	1	1	0	0	1	0	0	1	0	0	1	1	1	1	1	0	1	1	0	0
88	129	0.5375			1	0	0	1	0	0	0	1	0	1	1	0	1	0	0	0	1	1	0	1	1	0	1	1	1	1	1	0	0	1	0	0	1	0	0	1	0	1	1	1	0	1	1	0	0
cMT
aa translated	total RNCs bound by SRP				Individual RNCs (0 unbound, 1 bound)
0	0				0	0
1	0				0	0
2	0				0	0
3	0				0	0
4	0				0	0
5	0				0	0
6	0				0	0
7	0				0	0
8	0				0	0
9	0				0	0
10	0				0	0
11	0				0	0
12	0				0	0
13	0				0	0
14	0				0	0
15	1				1	0
16	1				1	0
17	1				1	0
18	0				0	0
19	0				0	0
20	1				1	0
21	1				1	0
22	1				1	0
23	1				1	0
24	0				0	0
25	0				0	0
26	0				0	0
27	0				0	0
28	0				0	0
29	0				0	0
30	0				0	0
31	0				0	0
32	0				0	0
33	0				0	0
34	0				0	0
35	0				0	0
36	0				0	0
37	0				0	0
38	0				0	0
39	0				0	0
40	0				0	0
41	0				0	0
42	0				0	0
43	0				0	0
44	0				0	0
45	0				0	0
46	0				0	0
47	0				0	0
48	0				0	0
49	0				0	0
50	0				0	0
51	0				0	0
52	0				0	0
53	0				0	0
54	0				0	0
55	0				0	0
56	0				0	0
57	0				0	0
58	0				0	0
59	0				0	0
60	0				0	0
61	0				0	0
62	0				0	0
63	0				0	0
64	0				0	0
65	0				0	0
66	0				0	0
67	0				0	0
68	0				0	0
69	0				0	0
70	0				0	0
71	1				0	1
72	1				0	1
73	1				0	1
74	1				0	1
75	0				0	0
76	0				0	0
77	0				0	0
78	0				0	0
79	0				0	0
80	0				0	0
81	0				0	0
82	0				0	0
83	0				0	0
84	0				0	0
85	0				0	0
86	0				0	0
87	0				0	0
88	0				0	0
[truncated: 193 more columns]

## Sheet: Fig3s2_upperleft_panel
number of tRNA pulses in each RNC		hist x_coord	hist y_coord
4		1	1
3		2	48
3		3	351
4		4	241
3		5	25
5		6	3
4
4
2
2
3
3
3
2
4
3
4
3
4
3
3
3
3
3
2
4
2
5
2
4
4
4
4
4
4
2
5
4
4
4
3
4
4
4
2
5
5
6
4
4
3
3
4
3
3
2
4
2
3
4
3
4
3
3
3
3
4
4
3
4
4
3
4
4
3
2
4
4
3
4
4
3
4
3
3
4
3
4
4
4
4
3
4
5
3
3
4
3
4
4
4
4
2
2
3
3
3
4
4
3
4
3
4
3
3
3
3
5
3
3
3
3
3
3
4
4
4
3
4
3
3
3
4
5
4
3
4
4
3
4
3
4
4
3
4
4
3
3
3
4
4
4
3
3
4
4
3
4
3
3
3
4
3
4
3
3
5
4
4
3
3
4
3
3
3
4
4
3
3
4
3
3
3
3
3
5
3
4
3
3
4
3
4
4
5
3
3
4
3
3
4
4
4
3
4
3
3
3
4
3
2
4
4
4
3
3
3
2
3
3
3
4
3
4
3
3
3
4
3
3
3
4
3
4
5
3
3
4
3
3
3
3
3
3
3
3
3
3
3
3
3
3
4
4
3
4
3
4
3
3
3
3
3
3
4
3
3
4
3
3
3
3
3
3
3
4
4
3
4
3
4
4
3
4
3
4
3
5
3
3
1
5
2
4
4
4
4
3
3
3
3
4
4
3
3
4
3
3
3
3
4
3
4
3
2
4
2
3
4
4
3
4
4
4
3
3
3
3
3
3
4
4
4
3
3
3
4
3
3
3
3
3
3
4
6
3
3
4
2
4
4
3
3
4
2
3
3
3
4
3
3
4
3
4
3
2
3
3
4
3
4
2
3
4
6
3
4
4
4
3
4
3
4
4
4
2
4
3
4
3
4
5
4
3
4
4
3
3
2
3
4
3
2
3
4
2
2
3
3
4
3
3
3
3
3
3
4
4
4
3
3
4
4
4
3
3
3
4
4
3
3
5
3
3
4
3
4
4
4
3
5
3
4
3
3
4
4
4
4
4
3
3
3
3
4
3
3
3
4
3
2
3
4
3
3
3
3
4
3
3
3
4
4
3
2
2
3
3
3
3
3
3
3
4
3
4
2
3
3
3
4
5
4
3
4
3
3
3
3
3
3
3
4
3
3
3
4
3
5
3
3
4
3
4
3
4
3
3
3
3
4
3
2
4
2
2
4
3
4
2
4
3
3
4
3
5
4
2
4
3
3
3
3
4
4
3
4
3
4
3
3
3
3
4
2
4
2
4
4
4
4
3
3
3
4
4
4
3
3
2
3
4
3
4
3
4
3
3
4
4
3
3
4
3
3
2
3
3
3
4
4
5
3
3
3
5
3
4
5
3
2
3
4
4
4
4
2
3
3
4
4
3
3
4
2
3
4
3
3
2
3
3
4
3
3
3
4
5
2
3
4
3
4
4
4
4
3
3
3
4
3
3
3
2
3
3
3
2
4
3
3
4
3
3
3
3
4
3
3
3
5
3
3
3
3
3
2
3
4

## Sheet: Fig3s2_upperright_panel
first pulse				second pulse				third pulse				fourth pulse
lifetimes (s)	single exponential fit average lifetime	95% confidence interval of fit		lifetimes (s)	single exponential fit average lifetime	95% confidence interval of fit		lifetimes (s)	single exponential fit average lifetime	95% confidence interval of fit		lifetimes (s)	single exponential fit average lifetime	95% confidence interval of fit
3	9.3572	8.6868		24.3	27.219	25.267		9.9	26.098	24.16		19.6	31.498	28.048
3.2		10.109		7.3		29.407		20.7		28.281		8.8		35.629
3.8				15.2				37				18.4
7.1				8				5.4				8.9
29.6				4.7				6.2				81.7
3.7				8.2				8.4				209.4
6.4				12.5				10.8				11.2
2.4				33.9				22.7				15.3
2.2				37.4				3.8				50.1
7.8				15.6				132.1				4
24.5				26.5				4.4				129.6
18.1				10.9				18.3				8.7
35				112.7				8.1				77.2
2.4				25.5				30.2				6.7
3.3				15.4				14.1				4.4
6.6				130.2				11.6				52.5
19				14				7.1				26.9
14.1				64.8				42.4				13
1.2				32				2.8				16.8
8.3				54.7				18.1				24.7
3				9.6				14.2				60
32.9				10				15.9				7.5
6.2				37.3				44.4				15.3
10.8				3.3				35.6				186
6.5				133.2				9.3				6.5
8.3				12.2				19.9				127.9
8.2				54.7				13.2				17
19.6				29.1				28				19.1
2.7				19.6				13.1				151.5
3				11.3				22.4				5.5
6.1				6.8				9.7				11.5
5.8				6.3				2.4				119.3
2.6				22.6				18				95.5
9.4				23.3				15				45.3
4.8				5.4				7.4				7.1
15.5				27.2				10.7				11
6.8				20.5				13.2				112.7
3.2				16.1				3.8				43.8
5.4				76.8				12.7				22.3
3.6				9.9				3.8				2.1
3.1				33.7				5.1				16.5
17.6				17.2				120.7				8.6
4.2				24.2				201				6.7
6.3				12.8				7.9				39.1
4.5				8.2				33.1				25.7
2				11.7				185.9				16.1
5.7				9.8				23.9				12
23.6				74.9				16.5				28
0.5				4.7				9.5				10.6
6.4				16.1				10.6				10.8
2.6				96.5				10.5				34
7.8				8.1				28.5				12
2.3				7.3				24.3				19.5
7.2				43.8				13.2				4.2
8.9				24.7				9.2				6.9
5.4				39.9				7.7				36.7
16.6				16				23.1				4.5
11.5				20				26.2				4.3
1.2				21.7				33.6				31.4
4.9				8.3				25.1				6.1
1.8				55.3				7				24
24.7				7.3				20.6				3.1
6.6				3.4				3				17.3
16.9				16.8				7.3				13
6				24.3				31.3				41.8
6.2				38.3				8.9				83.3
5.4				18.3				4.5				19.4
2.3				18.7				6				186.1
75.6				13.1				19.5				44.2
4.3				3				22.7				39.3
1.7				13.3				19				17.1
15.5				8.1				22.5				7.4
4.8				3.1				22.1				5
15.2				12.5				11.2				28.5
12				10.3				83.2				38.9
4.1				44.5				12.2				37.1
5.6				20.8				25.3				19.2
7.5				9.5				3.1				5.3
1.5				6.8				25.7				22.5
8.1				16.4				4.6				11.6
10.4				7.8				11.1				25.1
4.1				13.6				5.4				13.8
4.2				10.3				2				1.7
3.6				29.2				15.1				23
5.5				3.6				39.5				42.7
6.1				10.5				11.4				6.4
3.5				18.5				38.5				92.1
13.3				1.9				2.2				11.8
6.9				8.2				55.5				18.6
3				52				4.9				0.1
3.9				25.4				2.6				50.1
2.4				13.7				9.8				139.2
13.3				22.2				11.1				33.1
20.8				24.6				13.5				28.8
3.7				25.6				37.4				6.7
2.5				12.2				1.2				26.5
0.9				46.5				24				65.3
26				33.1				20.9				4.6
0.6				2.9				35.6				9.6
2.5				4.4				13.1				22.8
10.4				18.9				18.6				30.7
3.4				23.6				4.5				13.7
12.1				21.6				39.2				103.2
7.9				13.7				21.7				41.1
1.4				10.3				12.3				20.9
2.9				96.5				12				11.8
20.4				15.5				13.3				24
2.3				15.4				36.2				7.4
2.3				10.3				13.1				12
1.9				32.6				5.9				10.4
8.2				60.7				5.8				5.2
24.7				9.4				7.6				9
4.1				5.6				2.5				13.9
5.5				24.9				16.9				17.2
3.8				27.6				10.4				8.7
7.1				4.1				15				55.5
4.7				41.5				66.8				16.7
4.6				3.6				26				11.9
38.8				26				28.1				111.3
20.4				76.4				43				9.8
3				14.4				7.3				3.5
1.8				18.9				12.8				16.9
3.8				14.2				1.7				13.6
3				18.3				54.7				10.8
8.6				93.6				7.6				19.5
88.7				26.2				4.5				19.5
10.5				13.3				3.2				12.5
40.7				15.1				24				21
12.5				32.2				19.4				21.1
7.4				24				7				33.8
2.6				61.2				28.9				23.1
23.8				11.8				7.2				53.8
11.2				57.6				12.1				4.9
0.6				29				11.8				8.7
2.2				3.3				13.1				9.4
8.9				48				6.8				21.3
1.9				3.8				55.5				69.1
34				9.1				25.4				3
8.1				10.5				3.9				35
25.2				5				25.8				15
4.9				22.3				21				5.9
1.4				64.4				18.7				14.1
10.2				29.7				18.4				21.3
10.5				27.2				37.4				4.4
5				40.5				18.3				4.8
1				1.5				19.5				4.8
1.5				16.8				8.5				28.6
2				21.1				5.4				4
6.3				30.7				3.3				2.4
16.2				8.3				10				12.5
13.4				78.2				4.2				28.3
1.6				311.6				18.9				258.2
2.9				38.7				4.6				1.3
11.9				16.6				18.8				144.2
1.4				1.9				90.7				39.8
19.3				6.6				4				46.3
3.1				15.2				15.8				83.9
9.5				55.1				7.5				8.6
2.1				47.6				25.3				6.2
5.3				55.3				57.1				62
16.8				25.5				16.4				33.3
1.7				39.3				21.3				19.5
59.9				43.1				3.9				33
4.7				28				10.7				37.8
16.2				6.3				80.8				31.9
6.9				31				20				5.3
57.6				30.6				14.7				31.3
1.9				110.4				11.6				16.2
9				5.9				14				10.3
3.3				31.3				6.6				11.1
15.8				22.6				14.9				39.6
1.5				90.3				20.4				26.3
4.3				32.4				6.1				32.4
5.6				17				12.3				36.8
3.1				14.9				9.5				8.1
3.4				8.8				74.3				26.1
2.2				17.8				3.8				10.4
2.9				6.6				23.1				50.1
3.9				34.4				6.3				10.4
3.3				28.4				80.7				153.6
3				4.1				30.6				10.8
1.5				13.9				9				46.1
27.3				61.1				29.9				2.2
27.8				15				14.5				94.7
2.1				12.2				6.1				1.9
7.6				49.8				34.2				4.4
16.3				19.1				43.3				49
3.4				54.6				14.9				11.9
11.4				6.2				17.6				7.7
36.3				25.4				19.9				53.6
3.7				16.3				266.4				58.2
61.6				3.1				4.2				99.3
4.1				16.6				12.8				25.2
3.4				54.9				6.8				8.4
15.3				50.2				10.9				58.8
3.7				5.7				10.6				4
2.4				2.4				3				104.9
2.4				6.4				20.6				3.4
20.6				2.3				148.8				6.8
7.2				22.4				8.6				19.7
6.3				146.1				77.7				12
31.4				20.9				14.5				92.4
0.8				8				3.8				3.8
2.6				5.9				7.9				11.9
53.1				17.3				160.5				14.6
1				44.4				13.4				23.9
29.2				6.7				21.4				29.4
5.5				25.8				14.5				54.5
1.9				21.3				2.8				28.8
30.1				17.6				20.8				5.1
4.4				10.3				45				8
1.2				27.8				28.9				11.5
11.3				3.5				36.6				13.4
1.9				12.8				36.6				17.3
3.4				37.8				7.5				19
7.8				122.1				211.8				11.7
4.6				16.3				23.8				21.9
2.1				4.3				8.2				6.6
2.4				33.8				7.4				30.2
3.7				41.5				17.9				51.3
3.1				23.7				15.1				8.9
8.1				29.4				10				101.7
4.6				8.3				23.7				22.2
1.8				59.7				34.5				31.7
2.6				47				4.4				21.1
3.9				42.8				40.9				34.1
4.6				16.5				10.1				26.2
5.4				4.2				72.4				14.8
5.7				62.7				35				31.7
5.1				7				10.5				17.7
8.4				16.7				55.3				10.5
6.3				8.7				10.4				42.2
5.5				9.6				180.6				23.5
49.4				16.4				9.1				16.8
6.2				4.7				19.8				10.8
19				10.8				18.8				45.6
3.4				19.5				20.9				10.5
17.8				45.5				45.9				216.9
4.3				6.1				13.9				8.9
2.9				14.9				8.2				36.7
63.1				20.2				36.8				24.3
20.8				17.7				16.3				20.3
13.2				42.7				14				9
4.1				15.7				18.8				5.5
5.3				7.3				24				43.9
14.1				20.4				23.1				13.5
3.1				28.8				3				30.4
0.4				184				11.3				18.2
2.1				32				8.2				3
7.2				76.2				10.7				13.2
1.7				58.5				13.3				17.9
20.4				49				7.8				3.6
0.7				42				36.6				6.9
2.8				105.2				9.7				22.5
4.3				9.1				14.8				41.6
3				35.5				17.1				9.7
3.1				72.7				14.7				15.8
5.8				13.9				17				35.3
13.2				5.4				23.2				5.8
4.5				71.8				13.3				7
2.4				5.9				10.6				14.3
15.5				27.6				10.3				19.8
3.4				27				5.4				185.2
33.4				48.4				30.1				3.4
13.8				48.4				8.7				45.7
1.9				27.3				16.5				99.3
5.3				55.7				7.3				17.1
3.9				13.2				6.2				7.4
21				40.5				20.5				32.9
1.6				28.9				16.8
19.1				9.9				6.7
3.8				28.9				34.9
2.3				39.4				4.4
2.8				18.3				35.2
10.3				16.7				16.4
6.6				110.1				5.1
5.5				17.1				38.6
5				11.1				13.1
3.2				7.2				7.4
8.8				25				15.5
3.9				28				20.2
5.5				11.5				60.5
62.7				19.6				15.4
9.5				9.8				18.4
17.5				15.8				3.4
12.1				93				4.1
10.6				16.4				64.2
0.9				12.9				8.3
4.5				35.1				37.4
1				16.1				17.1
34.5				13.5				23.3
6.6				48.1				23.6
32.1				5.9				71.4
20.8				53.5				10
4.7				17				20.3
4.2				92.9				8.4
2.5				14.4				19.4
2.1				24.3				4.2
9.1				5.4				47.6
7.4				7				4
40.1				51.7				10.9
2.9				67.4				5.2
3.1				78.4				11.2
1.7				13.2				7.2
2				28				4.7
3.6				11.1				23.9
20.3				16				11.9
2.7				23.5				11
4.6				6.7				1.9
1.5				40.6				21.6
6.7				6.9				31.9
4				37.5				14.5
5.9				10.9				3.3
37.1				15.4				177.7
3.8				7.1				30.6
23.8				5.6				11.2
5				4.9				38.8
10.6				18.5				4
42.1				41.4				19.5
5.8				15.7				17.2
54.1				10.7				61.7
2.4				23.7				33
3.8				47.6				176.3
2.3				20.5				23.5
7.9				5.8				30
1.7				11.1				8.6
1.6				9.5				3.6
8.2				12.4				19.1
22.3				17.1				26.7
4.3				11.1				14.6
6.2				10.5				1.5
35.2				5.1				29.6
4.8				12.9				3.9
7				15.7				18.3
3.2				13.8				246.9
4.3				9.9				16.7
30.7				5.1				28.4
2.1				32				29.2
3.2				6.3				50.2
10.5				12.3				43.7
5.9				24.6				26.6
1.3				16				44.4
2.1				12.8				75.9
25.6				21.3				10.5
2.6				18.3				31.5
5.2				3.9				11.8
34.1				1.4				45.3
3.4				25.5				3.6
16.3				37.8				11.5
3.2				32.2				84
4.2				3.4				10.3
4				39.7				12.5
13.2				4.3				5.6
3.5				15.2				17.7
4.4				11.3				15.7
4.3				25.6				15
6.6				29.1				2.8
10.1				3				4.7
5.5				10.2				22.5
10.4				9.9				4.5
1				7.5				148.9
4.8				17.1				40.9
4				2.9				15.1
3.2				10.5				11.1
6.7				5.3				95.2
8.3				28.3				1.1
8.6				2.2				70.4
42.1				18.4				6.9
1.7				36.2				191.8
1.6				36				2.4
5.5				3.1				14.5
3.4				27.6				39.2
9.3				21.2				44.8
33.3				4.4				12.7
2.6				86.9				63.8
3				10				12.6
6.4				7.2				10.6
3.7				18				3.4
12.4				75.9				22.9
6.6				18.9				15.6
8.6				22.8				11.9
5.3				16.3				9.8
3.5				25.7				26.8
8.4				6.4				46.9
11.6				15.5				13.8
24				26.1				59.2
2.1				22.5				64.8
15.4				54.1				5.3
16.7				13.8				61.3
4.9				12.4				85.1
2.5				14.4				29.1
5.4				2.6				8.2
10.1				18.7				8
1.6				1.1				17.4
3.3				70.9				28.1
15.3				71.8				6.4
2.8				20.2				30
7.3				25.7				14.9
3.4				40.6				10.6
6.9				8.4				92.2
2				12.1				11
12.4				69.7				18.6
2.6				24.4				4.5
5				78.5				3.3
2.8				20.5				16.8
18.8				29.3				1.3
1.2				11.6				64.1
10.3				33.8				47.5
1.2				19				14.6
15.7				45.8				15.8
5.7				14				3.8
24.6				15				41.6
28.4				111.3				66
2.8				6.2				12.8
5.5				95.6				11
10.4				12.9				3.5
28.9				16.7				21.5
11.8				15				70.7
21.2				41.3				55.3
2.1				2.9				18.9
3.9				5.8				3.9
3.8				41.6				4
5.2				48				14.6
12.5				11.4				39.3
7.2				8.6				10.8
5				7.2				37.3
16.5				13.8				11.5
2.9				5.8				15.4
5.5				23.6				40.8
2.5				3.4				10.5
9				14.2				6.5
31.6				92.5				9.4
4.5				32.7				28.5
9.3				4.2				17.6
4.1				4.7				23.6
13.9				8.6				2.4
5.6				30.2				20
13.1				16.6				33.5
24.9				4.9				5.3
0.7				7.7				28.7
19.6				31.8				45.3
3.7				21.5				20.7
1.4				20.6				8.7
4.9				167				28.3
3.8				22.3				6.4
13.5				0.2				40.6
8.8				9.1				35.7
1.4				4.2				35.4
1.3				2.1				9.1
8.4				16.3				9.4
0.7				26.6				11.2
17.2				3.7				20.1
2.2				20.7				8.6
20.9				186.2				4.4
7.7				17.8				113
8.4				24.6				6.1
4.2				87.2				24.3
1				40.5				22.8
2.4				11.9				4.4
2.7				80.2				15.7
5.5				6.9				58.3
2.3				43.9				9.6
2.3				10.5				25.1
30.7				33.5				6.2
5.3				12.6				33.4
3				16				69.3
9.3				12.2				8.8
1.8				11				6
7.2				92.1				43.6
2				8.9				16.1
53.5				13.9				104.5
36				11.6				10.9
7.4				10.9				3.2
5.1				16.9				25.3
3.7				25.4				104.2
1.7				16.5				6.1
2.4				12.7				104.5
13.9				8.6				40.6
3.7				15.6				53.4
6.8				25.5				69.8
3.3				59.1				18.5
5.2				11.3				84.2
3.1				42.9				27.1
4.5				6.8				14.6
5				9.7				13.8
15				7.7				11.5
5.5				18				21
30.4				15.4				21.4
4.4				52.1				4.2
11.7				16.1				3.5
4.2				3.4				7.1
9				12.9				23.6
10.3				17.2				16.3
2.4				4.4				6.6
28.1				91.4				1.2
2.4				38.6				9.5
6.3				77.2				15.6
3.5				7.9				11.2
20.6				29.8				6.5
3.4				19.3				5.8
4				23.1				27.4
1.5				9.8				10.6
16.3				125				27
10.5				15.9				54.8
12.9				29.5				2.5
3.3				33.6				72.4
3.8				40				15.3
7				8.3				19.4
1.4				9.4				40.8
4.5				19				24.3
6.3				4.8				34.4
5.8				19.2				21.8
10.6				26.4				9.5
0.5				112.6				41.1
3.6				7.9				13
2.3				17.9				42.8
10.5				35.2				34.5
1.9				25.5				23.9
4.5				44				176.3
1				3.4				25.9
0.4				5.5				26.2
2.8				83.9				13.9
1.6				3				18
10.1				14.6				6.4
1.4				6.3				15
7				25.7				23.3
1				50.2				14.6
6.4				16.6				27.2
8.7				15.8				23.6
3.1				11.3				37.5
18.3				10.2				49.1
3.9				19.6				41.6
4				12.9				23.3
10.9				57.7				11.8
13.7				7.3				20.3
4.6				12.6				4.1
3.2				25.2				14.6
3.9				4.4				7.1
19.1				41.3				30.4
17.5				11.2				6.6
14.2				2.4				3.8
11.4				8				2.5
2.6				4				36.9
6				92				12.8
6.5				15.3				10.4
12.3				4.6				68.5
7.1				45.4				160.4
12.1				6.5				4.3
7.1				4.7				36.6
3.2				8.4				13.1
2.9				51.1				21
8				26.1				49.8
2.6				29.1				3.9
1.5				27				8.4
1.1				3.1				30.8
4.2				166.9				21.4
5.7				62.2				33.8
10.1				15.2				11
3.4				69.7				12.4
34.4				12.5				81.4
2.9				53.9				19.8
6.2				43.7				12
3.9				20.1				15.4
28.1				44.8				15.3
1.8				8.1				30.4
14.2				10.5				110.1
16				50.9				20.6
6				7.9				29.4
13.4				108.5				28.5
14.4				153.8				4.6
0.89999				20.6				43.1
3.8				52.3				45.8
3.7				11.3				17.1
63.8				13.3				20.2
4.5				43.5				26.2
37.7				24.5				2
25.1				4.9				33.7
2.5				6.1				18.4
81.7				19.1				34.5
31.9				22.5				27.5
9				30.4				7.1
3.8				9.8				6.8
4.9				26.6				27.7
1.1				8.8				12.2
3.8				47				11.1
4.2				4.4				75.4
22.2				97				14.2
1.2				7.9				10.1
2				20.7				29
2.3				35.7				28.1
2.9				0.3				48.7
13.2				8.3				37.8
16.1				22.9				28.8
7.9				13.4				5.3
1.4				25.5				5.2
10.3				11.4				46.4
6.6				19.3				7.7
8.2				15.1				28.8
9.7				18				14.2
9.1				0.90002				74.4
12.1				11.2				135.3
6.3				8.2				12.7
1.2				13				10.9
5.1				9.1				36.9
3.9				14.6				13.1
1.2				8.8				19.1
6.6				7.3				5.9
5.1				7.6				3.1
3.7				63.3				7.8
14				2.8				2.8
2.3				42.7				9
1.5				15				12.2
6.6				18.2				4.7
7				54.7				52.6
15.1				42.1				7.5
10.7				27.5				15.4
4.9				5				24.5
4.8				14.4				162.9
2.3				19.2				11.2
24.9				24.9				26.9
12.8				49.6
2				14.9
29.2				19.9
8.1				29.6
1.6				15.7
9.8				6.6
2.8				2.3
3.1				50.1
29.2				25.5
5				8.2
8.4				16.1
12				27.7
3.2				54.7
3.5				9.8
2.6				13.8
3				55.1
1.8				12.4
12.6				11.7
1.8				9
2.6				16
4.9				35
0.8				6.9
16.5				46.6
1.1				20.3
2.9				9.7
3.4				27.6
4.4				204.6
7.2				170.1
8.4				14.7
5.3				121.2
9.9				6
14.2				94.8
2.2				3.5
25.1				14.1
6.1				11.4
2.3				10.8
34				8.6
8				8.4
2.7				9.4
20				8.8
15				12.2
7.4				24.7
1.6				25.2
15.4				22.7
15.3				42
3.1				57.4
4.7				17.5
3.4				42.3
1.3

## Sheet: Fig3s2_lowerleft_panel
0-5aa				5-25aa				25-55aa				55-85aa
times (s)	cdf x_coord	cdf y_coord		times (s)	cdf x_coord	cdf y_coord		times (s)	cdf x_coord	cdf y_coord		times (s)	cdf x_coord	cdf y_coord
31.6	0.5	0		104.7	13.5	0		69.4	0.39999	0		391.5	31.7	0
14.3	0.5	0.0044843		102.4	13.5	0.001497		117.8	0.39999	0.0016129		277.8	31.7	0.0037175
23	3.2	0.0059791		153.9	17.6	0.002994		97.2	19.9	0.0032258		95.8	34.9	0.0074349
11	3.7	0.0074738		72.8	18.8	0.004491		76.4	32.3	0.0048387		95.9	35.5	0.011152
41.6	4.1	0.0089686		189.5	19.7	0.005988		388.8	34.6	0.0064516		120.4	35.5	0.01487
15.1	4.4	0.010463		70.5	21.8	0.007485		113.5	38.1	0.0080645		94	41.6	0.018587
29.8	4.4	0.011958		208.4	22.2	0.008982		48.5	39	0.0096774		247.4	42.8	0.022305
15.8	4.6	0.013453		156.3	23	0.010479		208.5	40.1	0.01129		335.4	43.1	0.026022
32.4	4.7	0.014948		83.6	23.5	0.011976		535.3	42.7	0.012903		224	45.4	0.02974
10.2	4.9	0.016442		204.4	24.9	0.013473		587.5	45.8	0.014516		101.8	45.7	0.033457
36.7	5	0.017937		114.6	25.1	0.01497		317.8	48.5	0.016129		100.2	48.1	0.037175
38.7	5.2	0.019432		98.3	25.3	0.016467		94.3	49.5	0.017742		68.1	48.1	0.040892
24.5	5.3	0.020927		198.2	25.9	0.017964		313.2	52.7	0.019355		89.8	49	0.04461
29.8	5.5	0.022422		110	26.5	0.019461		120.5	52.7	0.020968		258.8	49.3	0.048327
25.6	5.5	0.023916		99.7	28	0.020958		123.2	53	0.022581		374.8	50	0.052045
18.1	5.6	0.025411		80.8	28.6	0.022455		211.2	53.6	0.024194		434.7	50.7	0.055762
28.2	6	0.026906		112.9	31	0.023952		237.1	55.5	0.025806		92.3	51.3	0.05948
30.4	6	0.028401		155.1	31.8	0.025449		181.3	55.7	0.027419		124.7	51.4	0.063197
19.6	6.1	0.029895		86.8	32.1	0.026946		125.3	56.1	0.029032		173.8	51.7	0.066914
18.4	6.3	0.03139		86	32.7	0.028443		252.8	56.2	0.030645		116.6	55.3	0.070632
34.7	6.5	0.032885		352.1	33.3	0.02994		109.3	57.2	0.032258		403.1	56	0.074349
8.5	6.5	0.03438		137.8	35.3	0.031437		87.6	58.1	0.033871		299.1	56.4	0.078067
23.6	6.6	0.035874		73.1	36.8	0.032934		131.7	59.3	0.035484		491.2	58.5	0.081784
25	6.6	0.037369		115.1	38.4	0.034431		158.5	59.5	0.03871		95.9	58.6	0.085502
6.9	6.8	0.038864		161.3	38.7	0.035928		38.1	60.1	0.040323		171.3	58.9	0.089219
14.7	6.9	0.040359		35.3	39.4	0.037425		340.5	60.7	0.041935		31.7	59.2	0.092937
67.3	7.5	0.041854		93.1	40.2	0.038922		137	61.9	0.043548		72.6	59.9	0.096654
25	7.7	0.043348		227.1	40.7	0.040419		60.7	63.8	0.046774		212.2	60.7	0.10037
54.7	7.8	0.044843		102.9	41.1	0.041916		190.6	64.9	0.048387		522.8	61.2	0.10409
46	7.9	0.046338		84.4	41.4	0.043413		190	65.6	0.05		105.5	62.9	0.10781
25.2	8.1	0.049327		18.8	42.2	0.04491		115.5	68.8	0.051613		135.6	63	0.11152
16.4	8.2	0.050822		111.7	42.3	0.046407		201.7	69	0.053226		123.5	63.1	0.11524
7.8	8.3	0.052317		66.7	42.4	0.047904		84.8	69.4	0.054839		296	66.6	0.11896
40.6	8.3	0.053812		45.6	43.1	0.049401		128.1	69.6	0.056452		122.5	67.4	0.12268
15.6	8.5	0.055306		100.2	43.1	0.050898		59.5	72.7	0.058065		202.3	68.1	0.12639
15.5	8.5	0.056801		97.2	43.2	0.052395		147.9	72.8	0.059677		203.5	68.1	0.13011
17.2	8.6	0.058296		39.4	45.6	0.053892		164.7	72.9	0.06129		73	68.4	0.13383
12.8	8.6	0.059791		94.4	47.5	0.055389		90.5	73.9	0.062903		50.7	68.9	0.13755
11.6	8.7	0.061286		134.7	47.8	0.056886		434.2	74.1	0.064516		202.3	70.3	0.14126
13.1	8.7	0.06278		75.1	47.9	0.058383		121	74.7	0.066129		61.2	72	0.14498
21.3	8.8	0.064275		102.3	49.1	0.05988		78.6	75.3	0.067742		78.8	72.6	0.1487
46.2	8.8	0.06577		158	49.7	0.061377		281.2	76.4	0.069355		108.7	72.7	0.15242
21.6	8.8	0.067265		64.8	50.1	0.062874		268.6	77.1	0.070968		103	73	0.15613
17.6	8.9	0.070254		103.5	50.2	0.064371		201.7	77.3	0.072581		258.6	74.2	0.15985
49.8	9	0.073244		85.4	50.4	0.065868		87	78.6	0.074194		155.7	74.6	0.16357
13	9	0.074738		72.5	50.9	0.067365		131	79.3	0.075806		99.6	74.7	0.16729
41.6	9.3	0.076233		47.9	51.7	0.068862		238.5	79.4	0.077419		192.1	75.1	0.171
220.1	9.4	0.077728		104.6	52	0.070359		81.7	79.6	0.079032		93.3	78	0.17472
14.2	9.4	0.079223		66.7	52.6	0.071856		102.7	79.8	0.080645		161.1	78.8	0.17844
38.6	9.5	0.080717		86	52.9	0.073353		228.6	80	0.082258		109.2	81.2	0.18216
15	9.5	0.082212		210.3	53	0.07485		323.2	80.8	0.083871		62.9	82.9	0.18587
35.6	10	0.083707		231.2	54.4	0.076347		60.1	81.1	0.085484		119.5	83.9	0.18959
36.8	10.1	0.086697		23	55.2	0.077844		68.8	81.7	0.08871		137.4	87.4	0.19331
39.4	10.2	0.088191		91.3	55.4	0.079341		197.8	82.1	0.090323		157.6	89.8	0.19703
26.5	10.2	0.089686		153.3	55.5	0.080838		510.2	82.2	0.091935		451.8	92.3	0.20074
6.1	10.3	0.092676		143.3	55.7	0.082335		679.8	82.5	0.093548		173.1	92.9	0.20446
73.5	10.4	0.09417		74.1	56	0.083832		262.4	84.2	0.095161		34.9	92.9	0.20818
43.5	10.5	0.095665		275.6	56.2	0.085329		137.9	84.6	0.096774		137.9	93.3	0.2119
25.7	10.6	0.09716		84.1	56.5	0.086826		270.4	84.8	0.098387		51.4	94	0.21561
8.8	10.9	0.098655		98.5	56.7	0.088323		500.5	85.8	0.1		352.7	95.6	0.21933
26.8	10.9	0.10015		363.1	58	0.08982		160.9	86.5	0.10323		161.1	95.8	0.22305
37.6	11	0.10164		94.2	58.5	0.091317		158.9	87	0.10484		133.9	95.9	0.23048
19	11	0.10613		467.9	58.6	0.092814		439.4	87.5	0.10645		291.6	98	0.2342
20.4	11.1	0.10762		98.5	58.9	0.094311		115.7	87.6	0.10806		115.5	98.8	0.23792
31.6	11.1	0.10912		101.1	58.9	0.095808		77.1	87.6	0.10968		275	99.6	0.24164
36.1	11.1	0.11061		100.3	59	0.097305		171	88.2	0.11129		68.1	100.2	0.24535
54.1	11.1	0.11211		68	59.1	0.098802		79.4	88.9	0.1129		68.9	101.1	0.24907
40.3	11.2	0.1136		156.7	59.2	0.1003		130.2	89.3	0.11452		276.4	101.8	0.25279
37.3	11.2	0.1151		427	59.6	0.1018		90.6	90.3	0.11613		45.4	101.9	0.26022
32.5	11.3	0.11659		93.3	59.7	0.10329		55.7	90.5	0.11774		123.7	101.9	0.26394
12.8	11.3	0.11809		237.4	60.1	0.10479		230.1	90.6	0.11935		185.4	103	0.26766
13.6	11.3	0.11958		90.3	60.6	0.10629		136.5	90.6	0.12258		43.1	103.7	0.27138
41.8	11.4	0.12108		50.1	61.2	0.10778		111.5	91.4	0.12419		352.1	104.8	0.27509
16.5	11.4	0.12257		142.4	61.2	0.10928		285.4	92.2	0.12581		132.8	105.2	0.27881
17.7	11.5	0.12407		88.2	61.9	0.11078		207.1	92.6	0.12742		575.6	105.5	0.28253
37.9	11.6	0.12556		183.4	62	0.11228		174.8	92.7	0.12903		101.9	106	0.28625
10.2	11.6	0.12706		101	62.2	0.11527		287.6	94	0.13065		117.6	106.1	0.28996
35.9	11.7	0.13154		74.1	62.9	0.11677		293.8	94.2	0.13226		127.2	106.2	0.29368
36	11.8	0.13303		94.2	63.2	0.11826		161.1	94.3	0.13387		155.7	106.6	0.2974
10.5	12.1	0.13453		200.2	63.3	0.11976		170.2	94.5	0.13548		78	108.7	0.30112
31.3	12.4	0.13602		36.8	63.6	0.12126		119.3	95.2	0.13871		49	109.2	0.30483
8.7	12.5	0.13901		81.1	63.8	0.12275		92.6	95.5	0.14032		66.6	110.3	0.30855
32.9	12.6	0.142		411.5	64	0.12425		265.2	96.6	0.14194		98	110.3	0.31227
13.7	12.6	0.1435		160	64.6	0.12575		183.8	97.1	0.14355		198.9	115.3	0.31599
36	12.7	0.14499		66.7	64.7	0.12725		380.9	97.2	0.14516		134	115.5	0.3197
17.5	12.8	0.14798		28.6	64.8	0.13024		155.9	97.6	0.14677		74.2	116.6	0.32342
26.8	12.8	0.14948		220.7	64.8	0.13174		294.5	97.8	0.14839		59.2	117.6	0.32714
11.3	12.8	0.15097		346.7	65.8	0.13323		59.3	98.4	0.15		209.6	117.6	0.33086
36.9	12.8	0.15247		365.4	66.2	0.13473		347.2	98.7	0.15161		119.8	119	0.33457
25.3	12.9	0.15396		178.6	66.3	0.13623		161.4	98.9	0.15484		183.6	119.5	0.33829
61.5	12.9	0.15546		412.3	66.6	0.13772		148.6	98.9	0.15645		289.6	119.7	0.34572
14.2	13	0.15994		79.8	66.7	0.14072		118.4	99.1	0.15806		92.9	119.8	0.34944
25.9	13.1	0.16143		90.4	66.7	0.14222		676.8	100.9	0.15968		205.9	120.4	0.35316
57.5	13.2	0.16293		52.6	67	0.14371		139.9	101.7	0.16129		177.4	120.6	0.35688
30.8	13.3	0.16442		92.7	67.2	0.14521		193.9	102.2	0.1629		105.2	120.7	0.36059
15.1	13.5	0.16741		61.9	67.4	0.14671		87.6	102.5	0.16452		55.3	122.5	0.36431
17.9	13.6	0.16891		502.3	67.5	0.1482		398.3	102.6	0.16613		72	122.7	0.36803
80.2	13.6	0.1704		185.3	68	0.1497		232.7	102.7	0.16774		110.3	123.2	0.37175
10	13.7	0.17489		25.9	68	0.1512		117.3	102.8	0.16935		95.6	123.5	0.37546
36.8	13.9	0.17638		62.2	69.3	0.15269		77.3	103.1	0.17097		252.2	123.7	0.37918
21.1	13.9	0.17937		81.4	69.3	0.15719		85.8	103.1	0.17258		35.5	123.7	0.3829
17	14	0.18236		102.6	69.3	0.15868		122.3	103.7	0.17419		186.3	123.7	0.38662
50.9	14	0.18386		82.7	69.5	0.16018		135.4	104	0.17581		286.9	124.7	0.39033
25.7	14.2	0.18535		106.7	70	0.16168		305.8	104.1	0.17742		180.9	125.2	0.39405
28.6	14.2	0.18984		377.2	70.2	0.16317		72.7	104.8	0.17903		98.8	125.5	0.40149
5.3	14.3	0.19133		106.4	70.2	0.16467		193.6	106.1	0.18065		149.5	126.6	0.4052
8.6	14.4	0.19283		191.1	70.3	0.16617		352.4	107.7	0.18226		171.4	127.2	0.40892
9.3	14.4	0.19581		397.5	70.5	0.16766		138.2	107.9	0.18387		127.8	127.8	0.41264
15.6	14.6	0.19731		122.4	70.6	0.16916		261.2	108.3	0.18548		115.3	128.4	0.41636
19.3	14.7	0.2003		100.8	70.8	0.17066		438.9	108.4	0.1871		106.6	132.2	0.42007
33.9	14.8	0.20179		258.2	71.7	0.17216		123.4	108.9	0.18871		192.8	132.4	0.42379
52	14.9	0.20628		103.4	71.9	0.17365		392	109.2	0.19032		134.5	132.6	0.42751
49.5	14.9	0.20927		69.3	72.1	0.17665		64.9	109.3	0.19194		150.7	132.8	0.43123
10.9	15	0.21076		101.3	72.4	0.17814		113.4	109.4	0.19355		152.4	132.8	0.43494
17.6	15	0.21226		307.1	72.5	0.18114		98.9	109.5	0.19516		148.8	133.9	0.43866
7.7	15.1	0.21375		444.2	72.5	0.18263		111.7	110	0.19677		159.4	133.9	0.44238
122.3	15.1	0.21525		21.8	72.6	0.18413		196.5	110	0.19839		103.7	134	0.4461
4.1	15.2	0.21674		138.4	72.8	0.18563		244.5	110.1	0.2		161.3	134.1	0.44981
55.5	15.2	0.21824		130	73.1	0.18713		399.6	110.9	0.20161		212.8	134.2	0.45353
37.5	15.3	0.21973		231.7	73.3	0.18862		287.6	111.2	0.20323		56.4	134.5	0.45725
30.1	15.4	0.22123		87.7	73.5	0.19012		171.9	111.2	0.20484		138.4	135.6	0.46097
20.5	15.5	0.22272		70.2	73.7	0.19162		90.3	111.5	0.20806		106.1	136.6	0.46468
19.9	15.6	0.2287		81.2	74.1	0.19311		315.7	111.7	0.20968		138.3	137.4	0.4684
119.2	15.6	0.23019		74.9	74.1	0.19461		159	112.4	0.21129		67.4	137.9	0.47212
9.4	15.7	0.23318		114.6	74.2	0.19611		153.8	113	0.2129		75.1	138.3	0.47584
12.6	15.8	0.23468		188.1	74.3	0.1976		199.8	113.2	0.21452		83.9	138.4	0.47955
33.8	15.9	0.23617		91.5	74.4	0.1991		73.9	113.4	0.21613		229.5	142.4	0.48327
93.3	15.9	0.23767		126.9	74.4	0.2006		505.9	113.4	0.21774		106.2	142.5	0.48699
45.5	15.9	0.23916		111.2	74.6	0.2021		187.9	113.5	0.21935		396.3	147.5	0.49442
51.7	16	0.24066		88	74.9	0.20359		219.5	113.6	0.22097		125.2	147.6	0.49814
31.4	16	0.24365		104	75.1	0.20509		157.1	113.8	0.22258		256.2	148.8	0.50186
32.4	16	0.24664		212.1	75.6	0.20659		213	114	0.22419		181.1	149.2	0.50558
82.3	16.1	0.24813		78	76.1	0.20808		253.5	114.3	0.22581		157.9	149.5	0.50929
18.6	16.1	0.24963		83.3	76.4	0.20958		412.5	115.5	0.22742		197	149.8	0.51301
28.2	16.3	0.25112		187.7	76.5	0.21108		145.7	115.7	0.22903		63	150.7	0.51673
14.9	16.3	0.25262		119	76.6	0.21407		569.7	115.7	0.23065		162.2	150.9	0.52045
39.3	16.4	0.25561		103.2	76.6	0.21557		42.7	116	0.23226		45.7	152.4	0.52788
42	16.4	0.2571		148.6	76.7	0.21707		204.6	116.2	0.23387		101.1	155.2	0.5316
32.4	16.5	0.25859		89.7	77	0.21856		481	116.3	0.23548		236	155.7	0.53532
13.5	16.6	0.26009		55.2	77.2	0.22006		472.2	116.5	0.2371		293	155.7	0.53903
6.6	16.6	0.26158		88.9	77.4	0.22156		127.9	116.7	0.23871		50	156.8	0.54275
21.8	16.7	0.26457		23.5	77.6	0.22305		225.1	117.3	0.24032		134.1	157.6	0.54647
8.1	16.7	0.26607		70.3	77.7	0.22455		116.5	117.4	0.24194		136.6	157.9	0.55019
11.1	16.9	0.26906		170.2	77.8	0.22754		408.2	117.6	0.24355		282.9	159.2	0.5539
38.5	16.9	0.27055		56	78	0.22904		183.7	117.8	0.24516		317.4	159.4	0.55762
36.8	17	0.27205		374.6	78.1	0.23054		526.4	118.4	0.24677		164.1	161	0.56134
25.1	17.1	0.27354		134.4	78.2	0.23204		322.9	119.1	0.24839		58.9	161.1	0.56506
31	17.1	0.27504		111.6	78.3	0.23353		142.6	119.2	0.25		182.8	161.1	0.56877
16.9	17.2	0.27803		100.6	79.1	0.23503		212.4	119.3	0.25161		58.5	161.3	0.57249
72.7	17.4	0.27952		77.8	79.3	0.23653		205.3	119.3	0.25323		35.5	161.9	0.57621
25.2	17.5	0.28102		51.7	79.3	0.23802		283.1	119.7	0.25484		169.8	162.2	0.57993
11.6	17.6	0.28251		157.6	79.5	0.23952		119.3	119.9	0.25645		101.9	163.4	0.58364
33.2	17.6	0.287		142.1	79.6	0.24102		170.3	120.3	0.25806		58.6	164.1	0.58736
19.9	17.7	0.28999		360.1	79.7	0.24251		342.7	120.5	0.25968		354.4	167.5	0.59108
20.3	17.8	0.29148		124.4	79.8	0.24401		167.6	121	0.26129		383.1	169.8	0.5948
14.8	17.8	0.29297		79.5	79.9	0.24701		361.4	121.2	0.2629		59.9	170.5	0.59851
14.7	17.9	0.29447		125	80.4	0.2485		174.8	122.2	0.26452		119	171.2	0.60223
18	18	0.29596		110.5	80.8	0.25		166.5	122.3	0.26613		120.7	171.3	0.60595
41.8	18.1	0.29895		61.2	80.8	0.2515		205.9	122.4	0.26935		142.4	171.4	0.60967
10.1	18.1	0.30045		126.5	80.9	0.25299		301.3	123.2	0.27097		51.7	172.8	0.61338
26.1	18.3	0.30194		235.9	81	0.25449		242.1	123.3	0.27258		60.7	173	0.6171
12.6	18.3	0.30344		103.7	81.1	0.25599		84.2	123.4	0.27419		147.5	173.1	0.62082
42.7	18.3	0.30493		169	81.1	0.25749		523.9	123.4	0.27581		149.8	173.8	0.62454
55.2	18.4	0.30643		111.7	81.2	0.25898		199	123.6	0.27742		284.6	175.2	0.62825
24.9	18.5	0.30792		132.2	81.3	0.26048		356.4	124.2	0.27903		332.9	177.4	0.63197
3.2	18.6	0.30942		116.1	81.4	0.26198		213.2	125.3	0.28065		70.3	180.8	0.63569
30.4	18.6	0.31091		218.9	81.5	0.26347		491.7	125.7	0.28226		195.3	180.9	0.63941
13.9	18.6	0.31241		122.5	81.5	0.26497		315.6	126.5	0.28387		159.2	181.1	0.64312
47.9	18.6	0.3139		190.9	81.7	0.26647		166.7	126.9	0.28548		119.7	182.8	0.64684
0.5	18.7	0.3154		90.2	81.8	0.26796		165.7	127.3	0.2871		392.4	183.5	0.65056
82.1	18.7	0.31839		603.2	81.9	0.26946		182.4	127.5	0.28871		188.3	183.6	0.65799
29.9	18.9	0.32138		52	82.4	0.27096		96.6	127.6	0.29032		183.6	185.4	0.66171
31.9	19	0.32287		64.7	82.5	0.27246		502.2	127.9	0.29194		186.1	185.7	0.66543
40.4	19	0.32436		156.7	82.7	0.27395		202.6	128.1	0.29355		155.2	186.1	0.66914
23.8	19.1	0.32586		235.6	82.7	0.27545		137.5	128.6	0.29516		147.6	186.2	0.67286
19.1	19.1	0.32735		93.5	83	0.27695		423	128.7	0.29677		218.3	186.3	0.67658
174.6	19.2	0.33034		77.8	83.3	0.27994		282.5	129.7	0.29839		186.2	188.1	0.6803
58.7	19.3	0.33184		86.8	83.4	0.28144		310.5	129.8	0.3		372.3	188.3	0.68401
21	19.4	0.33333		137.1	83.6	0.28293		147.3	130	0.30161		224	188.8	0.68773
22.5	19.5	0.33483		92.4	83.9	0.28443		160.3	130	0.30323		125.5	189.6	0.69145
17.1	19.6	0.33632		135.1	83.9	0.28593		160.3	130.2	0.30484		132.6	192.1	0.69517
89.6	19.6	0.33782		69.3	84.1	0.28743		212.8	130.2	0.30645		475.4	192.8	0.69888
14.4	19.9	0.33931		196.2	84.2	0.28892		86.5	130.3	0.30806		185.7	193.1	0.7026
35.6	19.9	0.34081		380	84.3	0.29042		351.8	131	0.30968		41.6	193.7	0.70632
9	19.9	0.3423		96.1	84.4	0.29192		564.2	131.1	0.31129		236	194.3	0.71004
43.4	19.9	0.3438		92.6	84.8	0.29341		172.1	131.4	0.3129		248.7	195.3	0.71375
20.1	20	0.34529		397	85.2	0.29491		308.2	131.5	0.31452		173	197	0.71747
25.5	20.1	0.34679		41.4	85.3	0.29641		417.6	131.7	0.31613		123.7	198.9	0.72119
39.7	20.3	0.34978		122.6	85.4	0.2979		322	132.1	0.31774		132.2	201.5	0.72491
173.7	20.3	0.35127		160.1	85.9	0.2994		386.8	132.3	0.31935		63.1	202.3	0.73234
40.5	20.4	0.35277		103.8	85.9	0.3009		197	132.5	0.32097		225	202.4	0.73606
354.7	20.4	0.35874		144.5	86	0.3024		113	132.6	0.32258		183.5	203.5	0.73978
26.3	20.4	0.36024		144.3	86	0.30389		119.1	133.3	0.32419		123.7	204.6	0.74349
27.9	20.5	0.36173		47.5	86.7	0.30539		102.6	133.4	0.32581		48.1	205.9	0.74721
0.5	20.5	0.36323		362.2	86.7	0.30689		134.3	134.3	0.32742		188.1	209.6	0.75093
38.4	20.7	0.36472		88.2	86.8	0.30838		175.3	135.1	0.32903		204.6	212.2	0.75465
30.8	20.8	0.36622		257.8	86.8	0.30988		194.6	135.4	0.33065		49.3	212.8	0.75836
16.7	21	0.36771		32.7	86.9	0.31138		152.1	135.6	0.33226		163.4	215.9	0.76208
32.5	21	0.36921		149.1	87.1	0.31287		148.3	135.7	0.33387		550.8	218.3	0.7658
22.1	21.1	0.3707		105.2	87.2	0.31437		153.9	136.4	0.33548		161	224	0.76952
20.4	21.1	0.3722		124.9	87.3	0.31587		160	136.5	0.3371		281.3	224	0.77323
88.3	21.3	0.37369		84.8	87.4	0.31737		435.6	136.9	0.33871		133.9	225	0.77695
15.4	21.3	0.37519		101.6	87.7	0.32036		181.3	137	0.34032		316.9	229.5	0.78067
20.5	21.6	0.37668		293.9	87.8	0.32186		464.6	137.3	0.34194		42.8	231.6	0.78439
35.7	21.6	0.37818		236.7	87.8	0.32335		350.9	137.5	0.34355		189.6	232.7	0.7881
13.6	21.7	0.37967		394.9	88	0.32485		234.9	137.9	0.34516		202.4	236	0.79182
25.9	21.8	0.38117		161.5	88.1	0.32635		228.6	138.2	0.34677		240.2	236	0.79554
145.7	21.8	0.38266		59.2	88.2	0.32784		151.6	138.4	0.34839		270.6	238.5	0.79926
15.7	21.8	0.38416		77.4	88.2	0.32934		234.1	139	0.35		170.5	240.2	0.80297
15.6	21.9	0.38565		143.6	88.7	0.33084		303.2	139.2	0.35161		340	243.3	0.80669
73	21.9	0.38714		85.3	88.9	0.33234		210.5	139.4	0.35323		275.2	247.4	0.81041
11.7	21.9	0.38864		287.6	89	0.33383		252.1	139.6	0.35484		231.6	248.7	0.81413
49.4	22.1	0.39013		81	89.3	0.33533		56.1	139.9	0.35645		132.4	252.2	0.81784
25.4	22.1	0.39163		113.3	89.6	0.33683		451.3	140.5	0.35806		175.2	256.2	0.82156
6	22.3	0.39312		67.5	89.6	0.33832		201.9	142.4	0.35968		119.7	258.6	0.82528
25.6	22.3	0.39462		83.4	89.6	0.33982		165.1	142.6	0.36129		238.5	258.8	0.829
29.1	22.4	0.39761		390	89.7	0.34281		102.5	143.1	0.3629		172.8	260.2	0.83271
224	22.5	0.3991		310.1	89.7	0.34431		216.6	143.3	0.36452		134.2	264.5	0.83643
32.2	22.6	0.4006		98.9	89.9	0.34581		238.2	143.5	0.36613		394.9	270.6	0.84015
25.5	22.6	0.40359		119.1	90.2	0.34731		346.8	144	0.36774		48.1	275	0.84387
98.4	22.7	0.40658		99.5	90.3	0.3488		263.9	144.5	0.36935		92.9	275.2	0.84758
13	23	0.40807		98.1	90.4	0.3503		145.8	144.7	0.37097		117.6	276.4	0.8513
60.7	23.1	0.40957		72.6	90.4	0.3518		122.4	145.7	0.37258		194.3	277.8	0.85502
31.6	23.1	0.41106		82.5	90.5	0.35329		111.5	145.8	0.37419		120.6	281.3	0.85874
15.9	23.2	0.41256		290.2	90.5	0.35479		88.2	145.9	0.37581		125.5	282.9	0.86245
68.4	23.2	0.41405		276.3	91.3	0.35629		370.9	146	0.37742		104.8	284.6	0.86617
13.3	23.3	0.41555		134.4	91.3	0.35778		295.5	146.1	0.37903		232.7	286.9	0.86989
40.9	23.4	0.41704		162.1	91.5	0.35928		439.2	146.7	0.38065		306.8	286.9	0.87361
16.7	23.6	0.41854		154.5	91.7	0.36078		150.9	147.2	0.38226		347.1	289.6	0.87732
24.5	23.8	0.42003		71.9	92.2	0.36228		116.3	147.3	0.38387		147.5	291.6	0.88104
14.2	24	0.42152		143.7	92.4	0.36377		81.7	147.9	0.38548		188.8	293	0.88476
26.6	24	0.42302		107.1	92.5	0.36527		155.7	148.1	0.3871		132.8	296	0.88848
10.3	24.3	0.42451		76.6	92.5	0.36677		338.6	148.3	0.38871		201.5	299.1	0.89219
8.2	24.5	0.4275		112.2	92.6	0.36826		158.6	148.3	0.39032		122.7	306.8	0.89591
20.4	24.6	0.429		89	92.7	0.36976		409.5	148.6	0.39194		72.7	316.9	0.89963
32.4	24.7	0.43049		207.1	92.7	0.37126		179.4	149.4	0.39355		82.9	317.4	0.90335
42.6	24.8	0.43199		65.8	92.8	0.37275		202	150.1	0.39516		354.6	332.9	0.90706
53.3	24.8	0.43348		250.6	93.1	0.37425		98.9	150.2	0.39677		167.5	335.4	0.91078
44.5	24.9	0.43498		76.7	93.3	0.37575		218.8	150.3	0.39839		56	338.4	0.9145
47.3	25	0.43946		97.5	93.3	0.37725		227.1	150.3	0.4		286.9	340	0.91822
30.9	25.1	0.44096		265.2	93.4	0.37874		150.2	150.9	0.40161		149.2	343.8	0.92193
79.2	25.1	0.44245		212	93.5	0.38024		319.7	151.1	0.40323		150.9	347.1	0.92565
16.6	25.2	0.44544		93.4	93.7	0.38174		109.2	151.6	0.40484		264.5	352.1	0.92937
14.9	25.2	0.44694		118.4	93.9	0.38323		133.4	152.1	0.40645		123.2	352.7	0.93309
47.5	25.3	0.44843		77	94	0.38473		234.8	152.9	0.40806		101.9	354.4	0.9368
7.9	25.4	0.44993		77.2	94	0.38623		497	153.7	0.40968		171.2	354.6	0.94052
85.4	25.4	0.45142		113.4	94.2	0.38772		161.4	153.8	0.41129		74.6	368	0.94424
32.7	25.4	0.45291		33.3	94.2	0.38922		503.4	153.9	0.4129		338.4	372.3	0.94796
33.5	25.5	0.4559		118.1	94.3	0.39072		383.7	154.5	0.41452		260.2	374.8	0.95167
35.4	25.5	0.4574		154.3	94.4	0.39222		252.7	155.6	0.41613		193.1	383.1	0.95539
109.3	25.6	0.45889		58.5	94.5	0.39371		436.4	155.7	0.41774		180.8	391.5	0.95911
11.8	25.6	0.46039		81.9	94.7	0.39521		345.1	155.7	0.41935		87.4	392.4	0.96283
15.2	25.6	0.46338		58.6	95.2	0.39671		346.6	155.9	0.42097		110.3	394.9	0.96654
31.2	25.6	0.46487		125.9	95.3	0.3982		235.8	156	0.42258		161.9	396.3	0.97026
33.2	25.7	0.46637		128.3	95.4	0.3997		190.8	157.1	0.42419		243.3	403.1	0.97398
28.3	25.7	0.46786		145.9	96.1	0.4012		547.1	157.6	0.42581		106	434.7	0.9777
0.5	25.9	0.46936		235.5	96.1	0.40269		400.5	158.1	0.42742		128.4	451.8	0.98141
21.8	25.9	0.47085		155.3	96.3	0.40419		295.5	158.5	0.42903		74.7	475.4	0.98513
19.9	26	0.47235		166.3	96.8	0.40569		139.6	158.6	0.43065		142.5	491.2	0.98885
47.2	26.1	0.47384		81.8	97	0.40719		185.8	158.9	0.43226		152.4	522.8	0.99257
21.9	26.1	0.47534		118.4	97.1	0.40868		325.4	159	0.43387		156.8	550.8	0.99628
65.4	26.2	0.47683		215.6	97.2	0.41018		122.4	159	0.43548		215.9	575.6	1
24.3	26.3	0.47833		61.2	97.4	0.41168		178.1	159.2	0.4371		193.7
26.7	26.5	0.48281		196.4	97.4	0.41317		79.6	159.5	0.43871		343.8
36.4	26.6	0.4843		227.8	97.5	0.41467		188.5	159.8	0.44032		368
48	26.6	0.4858		98.2	97.5	0.41617		189.2	160	0.44194		51.3
11.3	26.7	0.48729		113.9	97.5	0.41766		114.3	160.3	0.44355		81.2
32.9	26.7	0.48879		83	98	0.41916		217.3	160.3	0.44516		68.4
87.3	26.8	0.49028		76.5	98.1	0.42066		143.3	160.4	0.44677		126.6
22.3	26.8	0.49327		84.2	98.2	0.42216		200.7	160.9	0.44839
46.1	26.9	0.49477		97.4	98.2	0.42365		199	161.1	0.45
14.4	27.3	0.49626		222.1	98.3	0.42515		102.8	161.4	0.45323
82.9	27.5	0.49776		213.5	98.5	0.42665		145.9	162.4	0.45484
10.9	27.6	0.49925		43.1	98.5	0.42814		284.4	162.6	0.45645
37.6	27.7	0.50075		97	98.7	0.42964		95.2	163.7	0.45806
36	27.7	0.50224		151.5	98.9	0.43114		343.7	164	0.45968
8.6	27.8	0.50374		85.2	99	0.43263		87.5	164.5	0.46129
11.5	27.9	0.50523		155.9	99.2	0.43413		130.2	164.7	0.4629
6.5	27.9	0.50673		74.2	99.2	0.43563		225.7	165.1	0.46452
204.5	28	0.50822		100	99.5	0.43713		366.2	165.7	0.46613
28.7	28.2	0.50972		205.2	99.5	0.43862		169.1	165.9	0.46774
17.6	28.2	0.51121		72.4	99.7	0.44012		152.9	166	0.46935
6.5	28.2	0.51271		124.9	100	0.44162		123.3	166	0.47258
97.7	28.3	0.5142		80.4	100	0.44311		450.6	166.5	0.47419
26.5	28.3	0.51719		103.9	100.2	0.44461		150.3	166.6	0.47581
62.4	28.6	0.51868		262.8	100.3	0.44611		154.5	166.7	0.47742
12.9	28.7	0.52018		177	100.6	0.4476		248.1	167.5	0.47903
27.7	28.8	0.52167		73.7	100.7	0.4491		158.1	167.6	0.48065
34.2	29.1	0.52317		93.3	100.8	0.4506		300.4	168.6	0.48226
219.1	29.1	0.52466		64	100.8	0.4521		206.2	168.7	0.48387
82.1	29.2	0.52616		77.7	101	0.45359		111.2	169.1	0.48548
12.6	29.4	0.52765		182.8	101	0.45509		170.9	169.3	0.4871
167.8	29.5	0.53064		103.3	101.1	0.45659		349.4	170.2	0.48871
32.1	29.8	0.53214		70.8	101.2	0.45808		144.7	170.3	0.49032
26.7	29.8	0.53363		25.3	101.2	0.45958		97.1	170.9	0.49194
41.2	29.9	0.53513		89.7	101.3	0.46108		91.4	170.9	0.49355
25.4	30	0.53662		173.1	101.6	0.46257		166	171	0.49516
94	30.1	0.53812		97.5	101.7	0.46407		79.3	171.1	0.49677
21.7	30.2	0.53961		206.7	102.3	0.46557		402.8	171.9	0.49839
210.4	30.3	0.54111		274.4	102.4	0.46707		109.5	172.1	0.5
55.6	30.4	0.5426		252.2	102.4	0.46856		104	172.3	0.50161
13.2	30.4	0.54559		213.3	102.6	0.47006		100.9	173.3	0.50323
23.3	30.7	0.54709		250.5	102.9	0.47156		262.2	174.8	0.50484
19.5	30.8	0.54858		79.3	103.2	0.47305		110.1	174.8	0.50806
22.6	30.8	0.55007		87.8	103.3	0.47455		212.4	175.3	0.50968
6.6	30.8	0.55157		118.6	103.4	0.47605		128.7	175.7	0.51129
40.2	30.9	0.55306		349.4	103.5	0.47754		97.6	178.1	0.5129
22.3	31	0.55456		89.6	103.7	0.47904		101.7	179.4	0.51452
35.5	31	0.55904		148	103.8	0.48054		164	180.7	0.51613
30.7	31	0.56054		444.9	103.9	0.48204		122.2	181	0.51774
49	31.1	0.56203		211.4	104	0.48353		284.5	181.3	0.52097
45.1	31.2	0.56353		107.1	104.1	0.48503		58.1	182.4	0.52258
54.7	31.3	0.56502		169.9	104.2	0.48653		108.4	183.7	0.52419
33.3	31.4	0.56652		95.3	104.3	0.48802		303.7	183.8	0.52581
138.2	31.6	0.56801		86.7	104.6	0.48952		82.1	184.7	0.52742
23.2	31.6	0.571		128.9	104.7	0.49102		150.1	184.9	0.52903
130.9	31.8	0.5725		81.1	105.1	0.49251		127.6	185	0.53065
31.8	31.9	0.57399		201.7	105.2	0.49401		61.9	185.8	0.53226
16.3	32.1	0.57549		94.3	105.2	0.49551		148.1	187.9	0.53387
35.1	32.2	0.57698		142.3	105.3	0.49701		248.9	188.1	0.53548
156.2	32.4	0.58296		74.6	105.3	0.4985		126.9	188.5	0.5371
50.6	32.4	0.58445		32.1	105.3	0.5		362.7	189	0.53871
28	32.5	0.58744		155.3	106.1	0.5015		136.4	189.1	0.54032
190.1	32.5	0.58894		68	106.4	0.50299		107.7	189.2	0.54194
17.1	32.7	0.59193		191.8	106.7	0.50449		49.5	189.8	0.54355
12.8	32.9	0.59342		81.5	107.1	0.50599		129.8	190	0.54516
13	32.9	0.59492		70	107.1	0.50749		426.8	190.6	0.54677
13.9	33	0.59641		90.5	108.8	0.50898		159.5	190.7	0.54839
4.6	33.2	0.59791		66.6	109.7	0.51048		39	190.8	0.55
14	33.2	0.5994		96.8	109.9	0.51198		120.3	190.8	0.55161
50.6	33.3	0.6009		386.7	110	0.51347		340.8	192.6	0.55323
12.7	33.4	0.60239		66.2	110.1	0.51497		184.7	192.9	0.55484
11.7	33.4	0.60389		105.1	110.5	0.51647		130	193.6	0.55645
40	33.5	0.60538		86.7	111	0.51796		97.8	193.8	0.55806
33.5	33.5	0.60688		142.9	111.2	0.51946		258.7	193.9	0.55968
25.5	33.7	0.60837		58	111.3	0.52096		174.8	194.6	0.56129
16.1	33.8	0.60987		49.7	111.6	0.52246		190.7	194.6	0.5629
10.6	33.8	0.61136		119	111.6	0.52395		262.6	195.2	0.56452
31	33.9	0.61286		99.2	111.7	0.52545		98.4	195.4	0.56613
56.8	34	0.61435		105.3	111.7	0.52695		381.1	196.3	0.56774
68.6	34.1	0.61584		67.4	112.2	0.52844		82.2	196.5	0.56935
48.9	34.2	0.61734		85.9	112.2	0.52994		144	197	0.57097
11.4	34.2	0.61883		361.7	112.5	0.53144		165.9	197.4	0.57258
117.7	34.5	0.62033		136.3	112.9	0.53293		108.3	197.8	0.57419
41.3	34.6	0.62182		95.2	113.3	0.53443		224.4	199	0.57581
15.2	34.7	0.62332		118.7	113.4	0.53593		231	199	0.57742
56.6	34.7	0.62481		31.8	113.6	0.53743		240.6	199.8	0.57903
16.4	35.1	0.62631		270.2	113.9	0.53892		146	200.7	0.58065
95.4	35.2	0.6278		359.9	114.2	0.54042		110	201.7	0.58226
72.1	35.3	0.6293		120	114.3	0.54192		79.8	201.7	0.58387
23.1	35.3	0.63079		63.3	114.6	0.54341		137.3	201.9	0.58548
261.8	35.4	0.63229		101.2	114.6	0.54491		84.6	202	0.5871
29.5	35.5	0.63378		40.7	114.6	0.54641		256	202.6	0.58871
35.2	35.5	0.63677		304.2	115.1	0.5479		126.5	203	0.59032
12.8	35.6	0.63976		111	115.1	0.5494		108.9	203.8	0.59194
32.4	35.7	0.64126		81.7	115.5	0.5509		92.2	204.6	0.59355
23.1	35.7	0.64275		89.7	115.5	0.5524		238.5	204.8	0.59516
8.1	35.9	0.64425		76.6	115.9	0.55389		127.3	205.3	0.59677
10.3	36	0.64574		115.9	116.1	0.55539		446.7	205.9	0.59839
52.5	36	0.64723		81.3	116.1	0.55689		88.9	206.2	0.6
9.4	36	0.64873		50.9	116.5	0.55838		170.9	206.8	0.60161
14.9	36	0.65022		70.6	116.5	0.55988		59.5	207.1	0.60323
11.2	36.1	0.65172		160.3	118.1	0.56138		546.6	207.4	0.60484
14.9	36.2	0.65321		87.1	118.1	0.56287		132.6	208.5	0.60645
22.6	36.2	0.65471		78.1	118.4	0.56437		241.3	210.2	0.60806
12.9	36.4	0.6562		133	118.4	0.56587		522.4	210.5	0.60968
101.8	36.7	0.65919		135.5	118.6	0.56737		203	211.2	0.61129
97.2	36.7	0.66069		97.4	118.7	0.56886		115.7	211.7	0.6129
39.4	36.7	0.66218		76.6	119	0.57186		63.8	212.4	0.61613
30.3	36.8	0.66368		94	119.1	0.57335		127.5	212.8	0.61774
8.8	36.8	0.66667		49.1	119.2	0.57485		438.9	213	0.61935
46.9	36.8	0.66816		130.4	119.3	0.57635		296	213.2	0.62097
149.6	36.9	0.66966		161.3	119.9	0.57784		189.8	213.4	0.62258
36.7	37	0.67115		220	120	0.57934		130	215.1	0.62419
12.1	37.1	0.67265		280.7	120.1	0.58084		249.7	216.6	0.62581
9	37.3	0.67414		59.1	121.5	0.58234		95.5	217.3	0.62742
16	37.3	0.67564		104.1	121.6	0.58383		301.8	218.8	0.62903
74.3	37.3	0.67713		142.6	121.8	0.58533		119.7	219.5	0.63065
14.9	37.5	0.67862		154.3	122.4	0.58683		288.6	220.1	0.63226
74.3	37.6	0.68012		127.2	122.5	0.58832		196.3	220.3	0.63387
15.9	37.6	0.68161		179.2	122.6	0.58982		171.1	221.1	0.63548
123.5	37.7	0.68311		152	122.9	0.59132		167.5	222.2	0.6371
5.6	37.7	0.6846		104.3	122.9	0.59281		279	223.5	0.63871
51.7	37.9	0.6861		42.4	123	0.59431		116.2	224.4	0.64032
17.7	38.1	0.68759		147.5	123.2	0.59581		341.4	224.5	0.64194
35.3	38.2	0.68909		69.3	123.6	0.59731		378.8	225.1	0.64355
38.9	38.4	0.69058		119.3	123.8	0.5988		260.2	225.7	0.64516
19.2	38.4	0.69208		145.3	124.4	0.6003		505.1	226.7	0.64677
19.6	38.5	0.69357		89.6	124.9	0.60329		94	227.1	0.64839
4.4	38.6	0.69507		273.9	125	0.60479		505.5	228.2	0.65
8.9	38.7	0.69656		206.1	125.1	0.60629		56.2	228.6	0.65161
83.7	38.9	0.69806		53	125.4	0.60778		163.7	228.6	0.65323
30.2	39.2	0.69955		146.2	125.9	0.60928		338.9	230.1	0.65484
37	39.3	0.70105		112.5	126.1	0.61078		135.6	230.2	0.65645
8.3	39.4	0.70254		137.8	126.4	0.61228		226.7	230.5	0.65806
46.7	39.4	0.70404		64.8	126.5	0.61377		102.2	231	0.65968
18.1	39.5	0.70553		121.8	126.9	0.61527		278.6	232.7	0.66129
51.4	39.7	0.70703		219.4	127.2	0.61677		220.1	233.6	0.6629
34.7	40	0.71001		94	127.2	0.61826		104.1	234.1	0.66452
13.5	40.2	0.71151		88.1	127.7	0.61976		220.3	234.7	0.66613
18.6	40.3	0.713		113.6	128.3	0.62126		40.1	234.8	0.66774
55.8	40.4	0.71599		38.7	128.9	0.62275		724.9	234.9	0.66935
170.5	40.5	0.71749		63.2	130	0.62425		94.5	235.8	0.67097
8.3	40.6	0.71898		151.1	130.4	0.62575		410.1	237.1	0.67258
25.2	40.8	0.72048		154.8	131.2	0.62725		478.5	238.2	0.67419
120.7	40.9	0.72197		141.1	132.1	0.62874		189.1	238.5	0.67742
20	41.2	0.72347		92.5	132.2	0.63024		109.4	239.9	0.67903
49	41.3	0.72496		102.4	132.3	0.63174		135.7	240.6	0.68065
51.1	41.6	0.72795		106.1	132.4	0.63323		95.2	241.3	0.68226
33.8	41.8	0.72945		83.9	133	0.63473		319.2	242	0.68387
15	41.8	0.73094		509.8	133.8	0.63623		166.6	242.1	0.68548
27.6	42	0.73393		470	134.1	0.63772		398.8	244.5	0.6871
46	42.4	0.73543		28	134.2	0.63922		469	245.7	0.68871
43.8	42.6	0.73692		153.9	134.4	0.64072		160.4	247.7	0.69032
101	42.6	0.73842		60.6	134.4	0.64222		53	248.1	0.69194
80.1	42.7	0.73991		86.9	134.7	0.64371		74.7	248.9	0.69355
16.9	43.4	0.74141		40.2	135.1	0.64521		268.3	249.7	0.69516
69	43.5	0.7429		116.5	135.1	0.64671		90.6	252.1	0.69677
36.2	43.5	0.74439		62.2	135.5	0.6482		0.39999	252.7	0.69839
29.2	43.7	0.74589		92.2	136.3	0.6497		45.8	252.8	0.7
77.2	43.8	0.74738		247.8	136.9	0.6512		334.2	253	0.70161
36.8	44.5	0.74888		147.5	137	0.65269		135.1	253.5	0.70323
8.8	44.6	0.75037		42.3	137.1	0.65419		708.5	255.6	0.70484
142.7	45.1	0.75187		79.9	137.8	0.65569		399.5	256	0.70645
21.3	45.4	0.75336		64.6	137.8	0.65719		99.1	258.7	0.70806
122.4	45.5	0.75486		159.3	137.9	0.65868		121.2	259.1	0.70968
22.7	46	0.75635		84.3	138.2	0.66018		245.7	260.2	0.71129
36.7	46	0.75785		38.4	138.3	0.66168		131.1	261.2	0.7129
9.5	46.1	0.75934		31	138.4	0.66317		221.1	262.2	0.71452
15.6	46.2	0.76084		202.6	138.5	0.66467		234.7	262.4	0.71613
52	46.5	0.76233		98	138.9	0.66617		223.5	262.6	0.71774
34.5	46.7	0.76383		118.1	139	0.66766		307.8	263.9	0.71935
31.1	46.7	0.76532		146.5	139.2	0.66916		128.6	264.8	0.72097
20.3	46.9	0.76682		26.5	139.6	0.67066		113.6	265.2	0.72258
31	47.2	0.76831		153.7	139.8	0.67216		181	268.3	0.72419
46.5	47.3	0.76981		376.7	141.1	0.67365		366.6	268.3	0.72581
18.6	47.3	0.7713		97.5	141.2	0.67515		52.7	268.6	0.72742
22.7	47.5	0.7728		155	142.1	0.67665		564	269.9	0.72903
37.3	47.9	0.77429		19.7	142.3	0.67814		98.7	270.4	0.73065
91.1	48	0.77578		109.7	142.4	0.67964		230.2	270.5	0.73226
39.2	48.1	0.77728		101.2	142.6	0.68114		164.5	271.8	0.73387
28.2	48.4	0.78027		56.7	142.9	0.68263		559	275.3	0.73548
9	48.8	0.78176		87.7	142.9	0.68413		116	278.6	0.7371
122.9	48.9	0.78326		156.7	143.3	0.68563		57.2	279	0.73871
22.6	49	0.78475		116.1	143.6	0.68713		123.4	279.4	0.74032
137.7	49	0.78625		125.4	143.7	0.68862		507.1	281.2	0.74194
79.1	49.4	0.78774		17.6	144.2	0.69012		159.8	282.5	0.74355
14	49.5	0.78924		72.5	144.3	0.69162		159.2	283.1	0.74516
156.4	49.8	0.79073		95.4	144.5	0.69311		103.7	283.5	0.74677
11	50.4	0.79223		111.3	145	0.69461		222.2	284.4	0.74839
40.4	50.6	0.79522		105.3	145.3	0.69611		207.4	284.5	0.75
18.7	50.9	0.79671		74.3	145.8	0.6976		123.6	285.4	0.75161
35.5	51.1	0.79821		66.3	145.9	0.6991		143.1	285.4	0.75323
12.4	51.4	0.7997		147.3	146.2	0.7006		309	287.6	0.75484
38.2	51.7	0.8012		139.6	146.4	0.7021		53.6	287.6	0.75645
11.7	51.7	0.80269		132.3	146.5	0.70359		330.8	288.6	0.75806
100	52	0.80419		137.9	147.3	0.70509		215.1	293.8	0.75968
19.4	52	0.80568		73.3	147.5	0.70659		195.2	294.5	0.76129
38.4	52.4	0.80717		63.6	147.5	0.70808		104.8	295.3	0.7629
20.3	52.5	0.80867		111.6	148	0.70958		380.3	295.5	0.76613
17.2	53.3	0.81016		149.4	148.6	0.71108		153.7	295.8	0.76774
40.8	53.3	0.81166		100.7	149.1	0.71257		130.3	296	0.76935
25.6	53.5	0.81315		337.2	149.4	0.71407		72.8	300.4	0.77097
111.3	54.1	0.81465		146.4	150.2	0.71557		424.3	301.3	0.77258
37.7	54.7	0.81614		499.9	150.2	0.71707		271.8	301.8	0.77419
24.8	54.7	0.81764		100.8	150.6	0.71856		386.1	303.2	0.77581
11.1	54.7	0.81913		97.1	151.1	0.72006		463.5	303.4	0.77742
37.3	55.2	0.82063		142.9	151.5	0.72156		132.5	303.7	0.77903
20.4	55.5	0.82212		225.2	152	0.72305		139	305.8	0.78065
28.8	55.6	0.82362		153.8	153.2	0.72455		111.2	307.8	0.78226
129.3	55.8	0.82511		112.2	153.3	0.72605		81.1	308.2	0.78387
47.3	56.2	0.82661		164.7	153.7	0.72754		303.4	309	0.78548
18.3	56.6	0.8281		232.6	153.8	0.72904		333.9	310.3	0.7871
34.6	56.7	0.8296		92.5	153.9	0.73054		403.4	310.5	0.78871
24.8	56.8	0.83109		123	153.9	0.73204		255.6	310.8	0.79032
91.6	57.5	0.83259		87.2	154.3	0.73353		331.2	313.2	0.79194
154.7	58	0.83408		145	154.3	0.73503		69	315.6	0.79355
26.2	58.7	0.83558		69.3	154.5	0.73653		175.7	315.7	0.79677
24.6	58.7	0.83707		170.9	154.8	0.73802		500.9	317.8	0.79839
50.4	60.7	0.83857		157.1	155	0.74102		139.2	319.2	0.8
13.7	61.5	0.84006		79.9	155.1	0.74251		94.2	319.7	0.80161
24	61.5	0.84155		72.5	155.3	0.74551		192.9	322	0.80323
92	62.4	0.84305		55.5	155.9	0.74701		230.5	322.9	0.80484
4.7	64.9	0.84454		180	156.3	0.7485		363.8	323.2	0.80645
19.1	65.4	0.84604		74.4	156.7	0.7515		168.6	325.4	0.80806
43.7	65.4	0.84753		164.9	156.7	0.75299		192.6	328.3	0.80968
110.3	66.9	0.84903		89.9	157.1	0.75449		568.4	330.8	0.81129
42.4	67.3	0.85052		144.2	157.6	0.75599		315.7	331.2	0.8129
64.9	67.9	0.85202		176.8	158	0.75749		195.4	331.9	0.81452
16.3	68.4	0.85351		183.9	158	0.75898		156	333.9	0.81613
12.8	68.6	0.85501		69.3	158	0.76048		169.3	334.2	0.81774
34.1	69	0.8565		110.1	158.4	0.76198		259.1	338.6	0.81935
22.4	71.9	0.858		136.9	159.3	0.76347		149.4	338.9	0.82097
31	72.1	0.85949		240.3	160	0.76497		143.5	339.6	0.82258
16.7	72.7	0.86099		199.3	160.1	0.76647		80	340.5	0.82419
19	73	0.86248		139	160.3	0.76796		125.7	340.8	0.82581
65.4	73.5	0.86398		62	161.3	0.76946		136.9	341.4	0.82742
33	74.3	0.86547		138.2	161.3	0.77096		210.2	342.7	0.82903
15.7	74.3	0.86697		245.7	161.5	0.77246		295.3	343.7	0.83065
26.8	75.1	0.86846		59.7	162.1	0.77395		275.3	345.1	0.83226
36.2	76.8	0.86996		73.5	163.7	0.77545		331.9	346.2	0.83387
8.9	77.2	0.87145		150.2	163.8	0.77695		129.7	346.6	0.83548
21.9	78.4	0.87294		132.4	164.7	0.77844		377	346.8	0.8371
11.3	79.1	0.87444		127.7	164.9	0.77994		114	347.2	0.83871
16	79.2	0.87593		74.4	165.9	0.78144		116.7	349.4	0.84032
16.9	80.1	0.87743		41.1	166.3	0.78293		113.4	350.9	0.84194
24	80.2	0.87892		55.7	168.8	0.78443		32.3	351.8	0.84355
215.2	80.2	0.88042		81.5	169	0.78593		468.1	352.4	0.84516
12.5	82.1	0.88191		56.2	169.9	0.78743		166	353.1	0.84677
83.7	82.1	0.88341		87.3	170.2	0.78892		159	356.4	0.84839
48.4	82.3	0.8849		211.3	170.9	0.79042		206.8	359.5	0.85
8.7	82.9	0.8864		67.2	171.9	0.79192		63.8	361.4	0.85161
25.4	83.4	0.88789		94.7	172.7	0.79341		90.6	362.7	0.85323
15.9	83.7	0.88939		179.1	173.1	0.79491		139.4	363.8	0.85484
123.4	83.7	0.89088		24.9	176.8	0.79641		166	366.2	0.85645
24.7	85.4	0.89238		127.2	177	0.7979		375.5	366.6	0.85806
20.7	87.3	0.89387		172.7	178.6	0.7994		103.1	367.3	0.85968
20.4	88.3	0.89537		186.7	179.1	0.8009		72.9	369	0.86129
9.5	89.6	0.89686		50.4	179.2	0.8024		92.7	369.4	0.8629
138.4	91	0.89836		266.5	179.5	0.80389		180.7	370.9	0.86452
39.5	91.1	0.89985		121.5	180	0.80539		190.8	375.5	0.86613
6.8	91.5	0.90135		218.4	180.5	0.80689		204.8	377	0.86774
10.1	91.6	0.90284		133.8	181.8	0.80838		233.6	378.8	0.86935
18.9	92	0.90433		75.6	182.8	0.80988		184.9	379.3	0.87097
29.4	92.6	0.90583		158.4	183.4	0.81138		155.6	380.3	0.87258
92.6	93.3	0.90732		208.7	183.9	0.81287		89.3	380.9	0.87419
16	94	0.90882		78.2	185.3	0.81437		113.8	381.1	0.87581
18.5	94.1	0.91031		141.2	186.7	0.81587		197.4	383.7	0.87742
185	94.3	0.91181		139.2	187.7	0.81737		86.5	386.1	0.87903
17.4	95.4	0.9133		88.7	188.1	0.81886		211.7	386.8	0.88065
11	96.1	0.9148		91.3	188.4	0.82036		310.3	388.8	0.88226
35.3	97.2	0.91629		89.6	189.5	0.82186		82.5	392	0.88387
13.9	97.7	0.91779		96.3	190.9	0.82335		446.9	397	0.88548
129.3	98.4	0.91928		206	191.1	0.82485		131.4	398.3	0.8871
83.4	100	0.92078		59	191.3	0.82635		117.4	398.6	0.88871
48.8	101	0.92227		125.1	191.8	0.82784		132.3	398.8	0.89032
19.9	101.8	0.92377		220.6	194	0.82934		213.4	399.5	0.89194
94.3	103.5	0.92526		71.7	196.2	0.83084		369	399.5	0.89355
56.7	106.8	0.92676		116.5	196.4	0.83234		133.3	399.6	0.89516
25.6	109.3	0.92825		259.8	198.2	0.83383		399.5	400.5	0.89677
3.7	110.3	0.92975		181.8	199.3	0.83533		107.9	402.8	0.89839
20.8	111.3	0.93124		83.3	199.7	0.83683		283.5	403.4	0.9
23.4	113.1	0.93274		138.3	200.1	0.83832		203.8	408.2	0.90161
29.1	113.3	0.93423		101	200.2	0.83982		264.8	409.5	0.90323
18.6	114.2	0.93572		90.5	201.7	0.84132		132.1	410.1	0.90484
26.6	117.7	0.93722		331.2	202.6	0.84281		471.7	412.5	0.90645
25.1	118	0.93871		123.8	204.4	0.84431		443.7	417.6	0.90806
17.8	119.2	0.94021		43.2	205.2	0.84581		110.9	420.2	0.90968
195.4	120.7	0.9417		80.9	206	0.84731		146.7	423	0.91129
21.1	122.3	0.9432		155	206.1	0.8488		369.4	424.3	0.9129
18.3	122.4	0.94469		105.2	206.7	0.8503		34.6	426.8	0.91452
18.1	122.9	0.94619		91.7	207.1	0.8518		168.7	434.2	0.91613
11.2	123.4	0.94768		63.8	208.4	0.85329		148.3	435.6	0.91774
48.1	123.5	0.94918		114.3	208.7	0.85479		155.7	436.4	0.91935
61.5	125.2	0.95067		52.9	210.3	0.85629		131.5	438.9	0.92097
67.9	129.3	0.95217		135.1	211.3	0.85778		189	438.9	0.92258
45.4	129.3	0.95366		42.2	211.4	0.85928		242	439.2	0.92419
54.7	130.9	0.95516		199.7	211.4	0.86078		147.2	439.4	0.92581
11.1	135.7	0.95665		171.9	212	0.86228		367.3	443.7	0.92742
26.9	137.7	0.95815		134.1	212.1	0.86377		146.1	446.7	0.92903
27.5	138.2	0.95964		165.9	212.3	0.86527		75.3	446.9	0.93065
23.2	138.4	0.96114		126.4	213.3	0.86677		285.4	449.3	0.93226
7.5	142.3	0.96263		138.5	213.5	0.86826		124.2	450.6	0.93387
33.7	142.7	0.96413		55.4	215.6	0.86976		185	451.3	0.93548
94.1	145.7	0.96562		43.1	218.4	0.87126		513.5	463.5	0.9371
71.9	145.8	0.96712		79.3	218.9	0.87275		194.6	464.6	0.93871
103.5	149.6	0.96861		76.1	219.4	0.87425		239.9	468.1	0.94032
80.2	153.1	0.9701		122.9	220	0.87575		19.9	469	0.94194
17.8	154.7	0.9716		180.5	220.3	0.87725		142.4	471.7	0.94355
78.4	156.2	0.97309		150.6	220.6	0.87874		228.2	472.2	0.94516
76.8	156.4	0.97459		89.3	220.7	0.88024		295.8	478.5	0.94677
14.4	167.8	0.97608		99	222.1	0.88174		567.7	481	0.94839
44.6	170.5	0.97758		98.2	222.2	0.88323		106.1	491.7	0.95
188.2	173.7	0.97907		92.8	225.1	0.88473		517.5	497	0.95161
17.6	174.6	0.98057		163.7	225.2	0.88623		353.1	500.5	0.95323
26.1	185	0.98206		82.7	227.1	0.88772		151.1	500.9	0.95484
4.4	188.2	0.98356		56.5	227.8	0.88922		138.4	502.2	0.95645
32.7	190.1	0.98505		114.2	231.2	0.89072		188.1	503.4	0.95806
15.6	195.4	0.98655		77.6	231.7	0.89222		98.9	505.1	0.95968
32.5	204.5	0.98804		119.2	232.6	0.89371		527	505.5	0.96129
10.4	210.4	0.98954		158	235.5	0.89671		144.5	505.9	0.9629
19.2	215.2	0.99103		98.7	235.6	0.8982		397	507.1	0.96452
21.8	219.1	0.99253		87.4	235.9	0.8997		55.5	507.1	0.96613
5	220.1	0.99402		139.8	236.7	0.9012		112.4	510.2	0.96774
18.3	224	0.99552		122.9	237.4	0.90269		80.8	513.5	0.96935
114.2	241.5	0.99701		163.8	240.3	0.90419		359.5	517.5	0.97097
33.4	261.8	0.99851		58.9	245.5	0.90569		172.3	522.4	0.97258
52.4	354.7	1		79.6	245.7	0.90719		150.3	523.9	0.97419
38.1				54.4	247.8	0.90868		74.1	526.4	0.97581
145.8				115.5	250.5	0.91018		398.6	527	0.97742
33.4				13.5	250.6	0.91168		247.7	535.3	0.97903
113.1				62.9	251.3	0.91317		310.8	546.6	0.98065
26				137	251.8	0.91467		449.3	547.1	0.98226
15.3				72.1	252.2	0.91617		119.2	559	0.98387
26.5				123.6	257.8	0.91766		103.1	564	0.98548
20.4				123.2	258.2	0.91916		507.1	564.2	0.9871
125.2				79.7	259.8	0.92066		379.3	567.7	0.98871
58				99.5	261	0.92216		279.4	568.4	0.99032
42.6				64.8	262.8	0.92365		117.6	569.7	0.99194
25.6				585.5	265.2	0.92515		140.5	587.5	0.99355
5.2				335.3	266.5	0.92665		268.3	676.8	0.99516
53.5				121.6	270.2	0.92814		65.6	679.8	0.99677
31				134.2	273.9	0.92964		420.2	708.5	0.99839
27.7				286	274.4	0.93114		52.7	724.9	1
22.4				70.2	275.6	0.93263		346.2
14				119.9	276.3	0.93413		162.6
28.3				194	280.5	0.93563		193.8
16.6				126.1	280.7	0.93713		270.5
135.7				100	286	0.93862		119.9
58.7				25.1	287.6	0.94012		110
37.1				78.3	290.2	0.94162		339.6
28.3				212.3	293.9	0.94311		328.3
36				85.9	304.2	0.94461		157.6
46.7				153.2	307.1	0.94611		69.6
142.3				96.1	310.1	0.9476		113.2
30				92.7	329.2	0.9491		173.3
5.5				59.6	331.2	0.9506		269.9
34				251.3	335.3	0.9521		224.5
5.5				329.2	337.2	0.95359		162.4
66.9				90.4	346.7	0.95509		253
18.7				188.4	349.4	0.95659
11.4				235.5	352.1	0.95808
113.3				200.1	352.5	0.95958
91.5				94.5	359.9	0.96108
21				60.1	360.1	0.96257
118				138.9	361.7	0.96407
16				22.2	362.2	0.96557
30.8				101.7	363.1	0.96707
48.4				47.8	365.4	0.96856
25				104.2	374.6	0.97006
34.2				131.2	376.7	0.97156
16.1				220.3	377.2	0.97305
18.9				211.4	380	0.97455
12.5				251.8	386.7	0.97605
13.7				50.2	390	0.97754
22.1				115.5	394.9	0.97904
21.6				108.8	397	0.98054
56.2				82.4	397.5	0.98204
30.4				109.9	411.5	0.98353
6				99.2	412.3	0.98503
42				114.6	427	0.98653
6.3				80.8	444.2	0.98802
27.3				79.1	444.9	0.98952
40				132.1	467.9	0.99102
53.3				93.9	470	0.99251
21.9				145.8	499.9	0.99401
153.1				191.3	502.3	0.99551
35.7				69.5	509.8	0.99701
75.1				150.2	585.5	0.9985
14.6				87.8	603.2	1
16.4				179.5
241.5				76.4
27.9				105.3
14.2				120.1
35.5				67
106.8				168.8
11				158
29.5				280.5
27.8				115.1
43.5				222.2
96.1				245.5
11.1				58.9
37.7				93.7
91				72.1
4.9				352.5
36.7				83.9
8.5				261
18.7				225.1
16

## Sheet: Fig3s2_lowerright_panel
	0-5aa	5-25aa	25-55aa	55-85aa
half time (s)	27.6	105.76	172.36	148.2
expected normalization (normalized to 0-5aa)	1	4	6	6
observed normalization	1	3.8318	6.2448	5.3696

## Sheet: Fig3s3
FIRST				SECOND				THIRD
RAW	x_coord	y_coord		RAW	x_coord	y_coord		RAW	x_coord	y_coord
78.195	0	0		81.421	0	0		83.429	0	0
51.766	1	0		52.994	1	0		59.29	1	0
52.5	2	0		54.715	2	0		51.542	2	0
66.587	3	0		54.524	3	0		33.676	3	0
52.924	4	0		43.349	4	0		52.444	4	0
54.128	5	0		30.602	5	0		53.695	5	0
51.906	6	0		54.703	6	0		79.053	6	0
42.956	7	0		58.541	7	0		81.353	7	0
28.86	8	0		73.846	8	0		61.77	8	0
54.613	9	0		51.445	9	0		55.342	9	0
53.632	10	0.0018762		52.419	10	0		46.951	10	0
49.473	11	0.0018762		53.35	11	0.0031447		39.975	11	0
57.583	12	0		72.344	12	0		53.053	12	0.005814
51.747	13	0		54.157	13	0		83.55	13	0
50.179	14	0		54.454	14	0		46.77	14	0
46.66	15	0		54.213	15	0		55.148	15	0
48.44	16	0		80.929	16	0		53.635	16	0
51.689	17	0		60.888	17	0		53.618	17	0
51.761	18	0		55.195	18	0		54.922	18	0
69.29	19	0.0037523		46.398	19	0		71.718	19	0
53.838	20	0.0018762		38.512	20	0		49.976	20	0
60.03	21	0.0018762		47.824	21	0		64.027	21	0
53.934	22	0.0056285		54.613	22	0.0062893		47.707	22	0.005814
51.08	23	0.0093809		73.739	23	0		62.188	23	0
52.072	24	0.011257		83.805	24	0.012579		50.74	24	0.017442
51.545	25	0.0018762		53.104	25	0		80.682	25	0
76.49	26	0.0037523		45.651	26	0.0031447		39.738	26	0
59.889	27	0.0018762		46.447	27	0.0062893		78.397	27	0
53.103	28	0.0056285		52.788	28	0		53.418	28	0.005814
73.025	29	0.0037523		53.154	29	0		55.892	29	0
59.052	30	0.0018762		53.163	30	0.0031447		70.233	30	0
54.508	31	0.0037523		48.641	31	0.0062893		69.69	31	0.005814
52.282	32	0.0018762		51.258	32	0		52.521	32	0.005814
45.203	33	0.0056285		52.56	33	0.0031447		67.922	33	0.005814
31.025	34	0		54.139	34	0		60.836	34	0
46.145	35	0.0056285		53.844	35	0		78.425	35	0
44.395	36	0.0037523		57.081	36	0.0031447		72.048	36	0
45.615	37	0.0037523		48.924	37	0		46.366	37	0
83.933	38	0.0093809		53.939	38	0.0062893		82.381	38	0
70.924	39	0.011257		76.158	39	0.0031447		67.251	39	0.017442
46.529	40	0.0056285		46.727	40	0.015723		52.177	40	0
79.049	41	0.015009		58.631	41	0.009434		84.385	41	0.011628
54.202	42	0.011257		48.863	42	0.022013		54.202	42	0.005814
80.919	43	0.013133		55.382	43	0.012579		50.163	43	0.046512
50.814	44	0.015009		54.868	44	0.0062893		70.022	44	0.005814
43.44	45	0.020638		76.59	45	0.025157		49.611	45	0
30.088	46	0.035647		54.775	46	0.018868		32.658	46	0.023256
54.257	47	0.02439		83.858	47	0.025157		47.904	47	0.011628
54.086	48	0.050657		33.843	48	0.037736		53.308	48	0.046512
50.917	49	0.073171		36.161	49	0.037736		77.065	49	0.040698
51.781	50	0.06379		51.419	50	0.040881		53.844	50	0.05814
49.444	51	0.076923		69.714	51	0.059748		83.03	51	0.040698
50.714	52	0.075047		52.183	52	0.08805		75.806	52	0.075581
51.504	53	0.10319		53.543	53	0.1195		60.617	53	0.087209
49.669	54	0.082552		54.028	54	0.13208		50.617	54	0.093023
49.491	55	0.026266		56.926	55	0.031447		54.428	55	0.023256
59.069	56	0.013133		69.349	56	0.009434		57.554	56	0.023256
38.364	57	0.011257		50.522	57	0.012579		54.011	57	0.005814
60.482	58	0.0093809		54.345	58	0.015723		50.074	58	0
80.971	59	0.016886		51.013	59	0.0031447		66.474	59	0.017442
49.381	60	0.0075047		66.996	60	0.0062893		48.668	60	0.023256
51.396	61	0.0056285		53.453	61	0.009434		50.311	61	0.017442
31.673	62	0.0018762		54.782	62	0.009434		43.639	62	0.011628
53.108	63	0.0037523		57.324	63	0.012579		48.699	63	0
83.608	64	0.0018762		55.827	64	0.015723		52.05	64	0.017442
53.078	65	0		54.677	65	0.0031447		43.835	65	0.011628
41.544	66	0.0037523		49.623	66	0.0062893		53.385	66	0.005814
42.41	67	0		69.537	67	0.009434		52.735	67	0.011628
49.115	68	0.0037523		42.733	68	0		39.964	68	0.011628
75.675	69	0.0056285		79.543	69	0.012579		43.108	69	0.005814
44.111	70	0.0018762		80.372	70	0		50.291	70	0.02907
55.521	71	0.0075047		64.118	71	0.0031447		52.501	71	0.011628
46.855	72	0.0018762		49.71	72	0.009434		84.821	72	0.011628
50.324	73	0.0075047		53.916	73	0.015723		81.837	73	0.005814
52.301	74	0.0056285		47.34	74	0		24.507	74	0
73.452	75	0.0056285		47.965	75	0.0031447		60.222	75	0.011628
51.95	76	0.0075047		78.605	76	0.009434		43.595	76	0.005814
76.891	77	0.0056285		53.696	77	0.0031447		52.802	77	0.005814
51.184	78	0.0056285		54.835	78	0.015723		80.838	78	0.017442
25.329	79	0.013133		42.234	79	0.009434		52.918	79	0.005814
33.639	80	0.011257		54.769	80	0.012579		43.987	80	0.017442
47.109	81	0.011257		49.52	81	0.009434		82.193	81	0.023256
68.865	82	0.0018762		52.404	82	0.012579		50.123	82	0.011628
71.16	83	0.011257		50.413	83	0.009434		81.734	83	0.017442
50.511	84	0.02439		54.701	84	0.022013		43.099	84	0.023256
53.156	85	0		48.839	85	0		53.026	85	0
51.496				52.508				48.797
47.471				54.223				49.833
51.836				51.766				48.864
53.921				31.196				53.519
68.703				44.103				65.501
50.212				53.745				55.949
53.085				49.655				76.259
49.028				73.873				68.144
54.774				52.971				64.464
50.113				76.133				54.291
56.453				53.241				54.678
64.146				53.019				41.661
48.782				55.903				51.705
54.382				83.799				51.668
39.137				54.105				70.378
49.479				62.292				51.409
51.674				55.596				44.847
56.418				52.076				80.995
53.342				77.494				54.332
50.88				50.063				65.255
53.879				53.801				46.508
42.038				50.996				51.177
52.503				56.542				53.586
39.94				47.725				71.933
77.191				53.333				60.863
79.304				53.278				54.852
53.346				53.526				54.429
48.507				49.609				49.761
83.211				59.413				56.28
53.451				62.103				78.089
44.581				84.051				52.229
45.4				53.673				50.427
77.985				54.208				24.939
53.021				47.548				52.433
53.547				53.392				56.218
52.859				48.275				53.55
52.115				54.673				50.468
59.599				42.067				52.459
84.383				51.825				51.699
54.17				48.067				50.175
55.846				50.256				70.449
40.969				41.224				48.118
54.684				52.566				48.487
50.014				52.12				43.777
76.122				60.381				59.486
48.41				52.163				54.058
50.041				54.748				49.083
52.661				39.383				59.163
50.05				51.538				54.106
48.067				53.216				81.351
46.906				50.689				41.637
48.478				57.009				54.422
24.586				41.996				56.676
51.328				73.936				61.944
46.955				47.944				48.701
50.576				45.736				84.628
54.287				63.975				28.663
53.838				24.595				49.566
29.839				64.281				49.512
54.874				84.493				68.875
39.259				24.352				51.636
41.683				53.981				52.836
45.966				55.527				53.63
52.139				40.639				64.55
52.039				52.484				56.266
55.278				51.641				73.645
52.72				54.228				12.508
72.652				53.818				31.715
52.851				54.349				72.629
26.349				80.506				75.088
51.908				51.11				42.305
55.364				55.394				61.041
81.939				53.938				54.736
52.561				84.821				24.465
52.16				40.61				62.374
66.013				52.837				52.366
52.193				81.692				48.126
54.679				53.562				54.85
53.664				51.394				84.808
59.787				52.515				54.349
54.798				52.855				54.646
47.904				45.639				53.292
55.5				54.318				53.743
48.804				81.176				70.848
51.988				72.897				43.468
50.242				38.68				22.41
58.296				79.081
50.168				50.658
84.739				48.568
54.396				54.795
46.938				67.133
53.939				47.354
51.624				80.353
23.755				45.949
53.922				46.792
50.691				63.543
52.088				64.607
54.856				69.971
51.359				58.946
54.705				53.677
50.27				51.22
54.381				55.011
57.275				73.834
49.197				61.572
54.643				43.916
58.85				78.684
52.327				61.867
61.453				54.605
79.034				53.569
48.975				24.544
54.568				53.306
78.558				54.015
49.027				40.773
46.054				49.195
52.553				51.205
46.031				63.053
49.893				49.76
53.862				84.686
49.644				50.455
47.226				43.014
46.238				78.575
50.901				51.456
84.063				50.101
53.56				64.011
41.275				84.467
49.507				40.9
54.737				51.525
84.657				48.971
50.008				78.306
51.742				51.991
49.103				50.439
47.398				65.333
48.135				82.155
38.745				54.264
51.7				54.013
49.28				54.174
53.279				43.616
54.455				54.168
50.929				54.006
52.689				48.142
38.994				53.838
54.416				26.591
49.589				52.097
50.272				45.968
48.251				55.289
53.405				54.353
40.598				75.882
45.05				27.334
53.17				53.883
45.375				50.272
52.612				24.6
23.046				54.583
52.404				44.641
51.293				78.762
79.97				54.006
53.417				54.18
54.209				45.721
50.368				48.071
61.114				48.372
24.103				46.981
63.444				52.192
55.057				54.445
82.865				49.915
55.863				61.528
53.474				54.384
49.899				42.65
22.958				52.137
48.316				47.014
55.059				42.742
39.591				53.296
53.967				53.654
51.25				48.227
54.614				51.277
51.153				58.814
50.833				52.582
35.628				79.639
46.86				84.954
45.873				40.324
22.859				52.417
79.155				50.916
24.364				56.405
49.63				58.295
73.872				54.827
43.88				46.768
54.588				82.275
83.259				82.262
24.807				27.082
53.709				49.498
46.386				45.75
51.104				41.756
77.327				67.589
52.98				49.961
43.146				51.443
35.773				52.388
46.607				51.933
80.567				62.611
51.901				52.992
52.83				54.873
44.107				63.254
49.721				57.413
48.426				11.726
55.676				31.304
32.35				72.039
53.7				71.902
54.191				67.988
79.83				42.194
24.378				55
59.974				82.797
33.926				53.195
42.656				22.637
73.463				51.914
49.77				49.175
47.757				50.684
53.993				49.147
47.357				45.096
53.902				53.547
53.63				53.264
58.737				53.942
45.75				84.503
75.9				52.835
45.816				54.699
43.506				53.583
56.817				52.352
81.043				52.38
21.84				52.78
54.531				53.034
54.099				64.2
52.603				52.136
69.53				42.6
53.239				53.039
58.437				22.372
52.911				66.564
48.656
53.209
71.861
53.546
53.575
54.055
40.547
59.837
51.894
56.418
51.24
50.846
10.852
52.537
84.001
53.672
74.91
54.129
54.842
53.585
28.594
45.639
23.765
50.415
58.175
44.917
84.573
48.897
33.976
54.403
74.208
53.126
49.902
48.746
56.963
80.218
35.777
48.27
49.996
47.845
84.568
55.229
57.757
74.305
50.08
49.991
54.084
80.531
53.714
61.92
69.73
81.726
49.955
51.447
53.926
52.82
53.54
84.355
41.852
52.226
52.664
53.567
47.745
51.725
19.52
46.176
42.681
48.495
54.71
50.319
75.615
23.676
49.167
27.506
52.31
54.838
53.582
51.456
49.641
23.144
53.912
53.94
43.75
76.449
50.44
51.838
44.087
47.017
47.098
37.958
50.042
52.842
49.451
54.011
48.917
60.93
53.886
51.312
41.662
48.631
62.176
49.495
84.411
51.713
43.589
41.383
50.64
52.712
46.455
53.855
57.517
59.158
46.026
48.141
57.758
52.186
54.455
42.563
80.587
54.212
50.105
53.571
81.572
39.862
50.428
54.528
48.182
47.881
49.38
53.794
55.619
78.933
55.915
46.557
45.391
49.175
54.692
56.042
81.601
26.596
38.094
51.665
56.484
53.644
48.47
52.93
83.907
43.43
38.415
57.893
49.143
19.772
84.678
49.471
49.073
49.995
49.867
59.616
84.562
41.343
52.341
52.011
36.19
55.701
48.621
11.589
29.209
71.463
71.81
63.778
84.17
41.388
50.836
81.927
47.331
48.348
51.4
22.154
49.43
46.631
51.313
50.14
24.86
53.531
44.855
44.187
52.01
54.486
51.584
49.059
46.471
53.92
49.691
79.928
55.356
51.737
54.713
83.682
53.952
52.184
52.074
48.407
49.683
84.641
51.844
28.359
53.735
37.941
48.745
48.155
54.929
39.319
36.866
20.579
60.118

## Sheet: Fig3s4
	Number of RNCs bound
time	1st pulse	2nd pulse	3rd pulse	4th pulse
-60		0	13	100
-59.9		0	13	100
-59.8		0	13	100
-59.7		0	13	100
-59.6		0	12	100
-59.5		0	13	101
-59.4		0	13	100
-59.3		0	13	100
-59.2		0	13	100
-59.1		0	13	100
-59		0	13	100
-58.9		0	13	100
-58.8		0	13	100
-58.7		0	13	101
-58.6		0	12	101
-58.5		0	13	101
-58.4		0	13	101
-58.3		0	13	101
-58.2		0	13	103
-58.1		0	12	102
-58		0	12	102
-57.9		0	12	102
-57.8		0	12	102
-57.7		0	12	102
-57.6		0	12	102
-57.5		0	12	101
-57.4		0	12	100
-57.3		0	12	100
-57.2		0	12	100
-57.1		0	12	100
-57		0	12	99
-56.9		0	12	98
-56.8		0	12	98
-56.7		0	12	98
-56.6		0	12	98
-56.5		0	12	98
-56.4		0	12	98
-56.3		0	13	100
-56.2		0	15	100
-56.1		0	15	100
-56		0	15	100
-55.9		0	15	100
-55.8		0	15	101
-55.7		0	14	101
-55.6		0	14	101
-55.5		0	14	102
-55.4		0	14	102
-55.3		0	14	101
-55.2		0	14	103
-55.1		0	14	102
-55		0	14	102
-54.9		0	14	103
-54.8		0	13	102
-54.7		0	12	103
-54.6		0	12	103
-54.5		0	12	103
-54.4		0	12	103
-54.3		0	13	101
-54.2		0	13	101
-54.1		0	13	101
-54		0	12	101
-53.9		0	12	101
-53.8		0	12	101
-53.7		0	14	101
-53.6		0	14	101
-53.5		0	13	101
-53.4		0	13	101
-53.3		0	12	102
-53.2		0	10	102
-53.1		0	10	101
-53		0	10	100
-52.9		0	11	101
-52.8		0	11	101
-52.7		0	11	101
-52.6		0	11	101
-52.5		0	11	101
-52.4		0	10	102
-52.3		0	10	102
-52.2		0	10	103
-52.1		0	10	103
-52		0	10	104
-51.9		0	10	104
-51.8		0	10	104
-51.7		0	10	103
-51.6		0	10	103
-51.5		0	10	103
-51.4		0	10	103
-51.3		0	10	104
-51.2		0	11	104
-51.1		0	12	104
-51		0	11	102
-50.9		0	11	103
-50.8		0	11	103
-50.7		0	10	100
-50.6		0	10	101
-50.5		0	10	101
-50.4		0	10	101
-50.3		0	10	100
-50.2		0	10	100
-50.1		0	10	100
-50		0	10	100
-49.9		0	10	100
-49.8		0	10	100
-49.7		0	10	100
-49.6		0	10	100
-49.5		0	10	101
-49.4		0	10	101
-49.3		0	10	102
-49.2		0	11	102
-49.1		0	11	101
-49		0	11	101
-48.9		0	11	101
-48.8		0	11	102
-48.7		0	11	102
-48.6		0	12	102
-48.5		0	12	102
-48.4		0	13	101
-48.3		0	13	101
-48.2		0	12	101
-48.1		0	12	101
-48		0	12	101
-47.9		0	12	101
-47.8		0	12	101
-47.7		0	12	102
-47.6		0	12	102
-47.5		0	12	102
-47.4		0	12	102
-47.3		0	12	101
-47.2		0	12	101
-47.1		0	12	101
-47		0	12	101
-46.9		0	12	102
-46.8		0	14	102
-46.7		0	14	103
-46.6		0	14	103
-46.5		0	13	102
-46.4		0	13	102
-46.3		0	12	102
-46.2		0	12	102
-46.1		0	12	102
-46		0	12	103
-45.9		0	12	102
-45.8		0	12	101
-45.7		0	12	101
-45.6		0	12	102
-45.5		0	12	101
-45.4		0	12	102
-45.3		0	12	102
-45.2		0	12	102
-45.1		0	12	102
-45		0	12	102
-44.9		0	12	102
-44.8		0	13	102
-44.7		0	13	102
-44.6		0	13	102
-44.5		0	14	102
-44.4		0	14	102
-44.3		0	14	102
-44.2		0	14	102
-44.1		0	14	102
-44		0	14	102
-43.9		0	14	103
-43.8		0	14	102
-43.7		0	14	103
-43.6		0	14	104
-43.5		0	14	104
-43.4		0	14	104
-43.3		0	14	104
-43.2		0	14	104
-43.1		0	15	104
-43		0	16	104
-42.9		0	16	103
-42.8		0	16	103
-42.7		0	16	103
-42.6		0	16	104
-42.5		0	16	103
-42.4		0	16	102
-42.3		0	16	102
-42.2		0	16	101
-42.1		0	15	102
-42		0	15	102
-41.9		0	15	100
-41.8		0	15	100
-41.7		0	15	100
-41.6		0	14	100
-41.5		0	14	100
-41.4		0	14	102
-41.3		0	13	102
-41.2		0	13	102
-41.1		0	13	100
-41		0	13	99
-40.9		0	13	98
-40.8		0	13	98
-40.7		0	13	98
-40.6		0	13	98
-40.5		0	13	98
-40.4		0	13	97
-40.3		0	13	97
-40.2		0	13	97
-40.1		0	12	97
-40		0	12	97
-39.9		0	12	96
-39.8		0	12	96
-39.7		0	12	95
-39.6		0	12	96
-39.5		0	12	97
-39.4		0	12	97
-39.3		0	12	97
-39.2		0	12	97
-39.1		0	12	98
-39		0	12	98
-38.9		0	12	98
-38.8		0	12	97
-38.7		0	14	98
-38.6		0	14	98
-38.5		0	14	98
-38.4		0	14	98
-38.3		0	15	99
-38.2		0	15	99
-38.1		0	15	100
-38		0	15	100
-37.9		0	15	100
-37.8		0	15	100
-37.7		0	14	100
-37.6		0	14	100
-37.5		0	14	101
-37.4		0	14	101
-37.3		0	14	101
-37.2		0	14	101
-37.1		0	15	101
-37		0	15	101
-36.9		0	16	101
-36.8		0	16	100
-36.7		0	15	101
-36.6		0	14	101
-36.5		0	14	102
-36.4		0	14	102
-36.3		0	15	102
-36.2		0	15	100
-36.1		0	15	100
-36		0	15	99
-35.9		0	15	99
-35.8		0	16	99
-35.7		0	16	99
-35.6		0	16	99
-35.5		0	17	100
-35.4		0	17	100
-35.3		0	18	100
-35.2		0	18	100
-35.1		0	18	100
-35		0	18	103
-34.9		0	18	104
-34.8		0	17	104
-34.7		0	17	104
-34.6		0	17	102
-34.5		0	17	102
-34.4		0	17	102
-34.3		0	17	103
-34.2		0	16	103
-34.1		0	15	103
-34		0	15	103
-33.9		0	15	103
-33.8		0	15	103
-33.7		0	15	103
-33.6		0	14	103
-33.5		0	14	105
-33.4		0	14	103
-33.3		0	15	103
-33.2		0	15	104
-33.1		0	15	104
-33		0	15	104
-32.9		0	15	103
-32.8		0	15	103
-32.7		0	14	103
-32.6		0	14	103
-32.5		0	14	104
-32.4		0	14	104
-32.3		0	14	104
-32.2		0	14	105
-32.1		0	14	104
-32		0	14	103
-31.9		0	14	103
-31.8		0	14	102
-31.7		0	14	101
-31.6		0	15	103
-31.5		0	15	104
-31.4		0	16	104
-31.3		0	16	104
-31.2		0	16	104
-31.1		0	16	104
-31		0	16	103
-30.9		0	17	102
-30.8		0	17	102
-30.7		0	17	102
-30.6		0	17	101
-30.5		0	17	100
-30.4		0	17	100
-30.3		0	16	100
-30.2		0	16	100
-30.1		0	16	100
-30		0	16	101
-29.9		0	16	101
-29.8		0	17	101
-29.7		0	18	101
-29.6		0	19	100
-29.5		0	19	99
-29.4		0	19	99
-29.3		0	18	99
-29.2		0	18	99
-29.1		0	18	98
-29		0	18	99
-28.9		0	18	99
-28.8		0	18	100
-28.7		0	18	100
-28.6		0	19	100
-28.5		0	20	99
-28.4		0	21	101
-28.3		0	21	101
-28.2		0	21	103
-28.1		0	20	103
-28		0	20	102
-27.9		0	20	102
-27.8		0	21	102
-27.7		0	20	102
-27.6		0	20	103
-27.5		0	21	103
-27.4		0	21	101
-27.3		0	21	101
-27.2		0	19	101
-27.1		0	19	100
-27		0	19	100
-26.9		0	20	102
-26.8		0	19	102
-26.7		0	19	102
-26.6		0	20	102
-26.5		0	20	101
-26.4		0	21	100
-26.3		0	20	101
-26.2		0	20	101
-26.1		0	20	101
-26		0	20	100
-25.9		0	20	100
-25.8		0	20	99
-25.7		0	20	99
-25.6		0	20	99
-25.5		0	18	99
-25.4		0	18	99
-25.3		0	17	100
-25.2		0	18	100
-25.1		0	19	100
-25		0	20	100
-24.9		0	20	98
-24.8		0	21	98
-24.7		0	20	97
-24.6		0	20	97
-24.5		0	22	95
-24.4		0	22	95
-24.3		0	23	96
-24.2		0	23	98
-24.1		0	24	97
-24		0	23	97
-23.9		0	23	96
-23.8		0	24	96
-23.7		0	24	96
-23.6		0	24	97
-23.5		0	24	97
-23.4		0	24	98
-23.3		0	25	99
-23.2		0	26	100
-23.1		0	26	100
-23		0	26	100
-22.9		0	27	100
-22.8		0	27	100
-22.7		0	27	100
-22.6		0	27	101
-22.5		0	27	102
-22.4		0	27	102
-22.3		0	27	102
-22.2		0	27	101
-22.1		0	26	99
-22		0	24	98
-21.9		0	23	98
-21.8		0	24	98
-21.7		0	24	98
-21.6		0	23	97
-21.5		0	24	97
-21.4		0	25	97
-21.3		0	24	97
-21.2		0	23	97
-21.1		0	23	97
-21		0	23	98
-20.9		0	24	97
-20.8		0	24	98
-20.7		0	24	98
-20.6		0	25	98
-20.5		0	27	99
-20.4		0	28	99
-20.3		0	30	100
-20.2		0	29	99
-20.1		0	31	99
-20		0	31	99
-19.9		0	30	100
-19.8		0	28	99
-19.7		0	28	100
-19.6		0	29	101
-19.5		0	29	102
-19.4		0	30	102
-19.3		0	30	101
-19.2		0	30	100
-19.1		0	30	100
-19		0	29	100
-18.9		0	29	100
-18.8		0	31	101
-18.7		0	31	101
-18.6		0	32	101
-18.5		0	32	101
-18.4		0	32	101
-18.3		0	32	102
-18.2		0	31	102
-18.1		0	32	102
-18		0	31	102
-17.9		0	32	101
-17.8		0	33	102
-17.7		0	33	103
-17.6		0	32	103
-17.5		0	31	102
-17.4		0	32	104
-17.3		0	33	103
-17.2		0	33	104
-17.1		0	34	104
-17		0	33	104
-16.9		0	33	104
-16.8		0	33	105
-16.7		0	33	105
-16.6		0	33	106
-16.5		0	33	105
-16.4		0	33	104
-16.3		0	33	104
-16.2		0	35	105
-16.1		0	35	105
-16		0	36	105
-15.9		0	36	105
-15.8		0	34	105
-15.7		0	34	104
-15.6		0	34	104
-15.5		0	33	104
-15.4		0	33	104
-15.3		0	33	104
-15.2		0	32	103
-15.1		0	32	105
-15		0	34	105
-14.9		0	35	105
-14.8		0	35	105
-14.7		0	34	105
-14.6		0	34	106
-14.5		0	34	106
-14.4		0	33	106
-14.3		0	34	106
-14.2		0	35	106
-14.1		0	35	106
-14		0	35	105
-13.9		0	35	106
-13.8		0	34	106
-13.7		0	34	107
-13.6		0	35	106
-13.5		0	36	107
-13.4		0	35	107
-13.3		0	36	107
-13.2		0	36	106
-13.1		0	35	106
-13		0	35	106
-12.9		0	35	106
-12.8		0	36	104
-12.7		0	36	104
-12.6		0	36	103
-12.5		0	36	103
-12.4		0	39	102
-12.3		0	38	100
-12.2		0	38	101
-12.1		0	39	101
-12		0	39	102
-11.9		0	38	102
-11.8		0	38	102
-11.7		0	36	102
-11.6		0	36	102
-11.5		0	36	102
-11.4		0	36	101
-11.3		0	37	104
-11.2		0	37	104
-11.1		0	39	105
-11		0	39	105
-10.9		0	39	104
-10.8		0	39	104
-10.7		0	39	105
-10.6		0	39	105
-10.5		0	40	105
-10.4		0	40	104
-10.3		0	40	105
-10.2		0	40	105
-10.1		0	39	105
-10		0	39	104
-9.9		0	40	105
-9.8		0	39	105
-9.7		0	39	105
-9.6		0	39	105
-9.5		0	39	105
-9.4		0	37	105
-9.3		0	37	105
-9.2		0	37	105
-9.1		0	38	105
-9		0	38	105
-8.9		0	37	105
-8.8		0	37	105
-8.7		0	38	104
-8.6		0	38	104
-8.5		0	38	103
-8.4		0	38	103
-8.3		0	38	103
-8.2		0	39	102
-8.1		0	38	103
-8		0	37	105
-7.9		0	38	106
-7.8		0	38	106
-7.7		0	38	105
-7.6		0	40	104
-7.5		0	39	103
-7.4		0	39	103
-7.3		0	40	103
-7.2		0	40	103
-7.1		0	40	103
-7		0	40	103
-6.9		0	40	103
-6.8		0	40	103
-6.7		0	41	104
-6.6		0	41	104
-6.5		0	41	104
-6.4		0	41	103
-6.3		0	42	103
-6.2		0	45	104
-6.1		0	45	107
-6		0	45	108
-5.9		0	46	108
-5.8		0	46	109
-5.7		0	47	109
-5.6		0	47	108
-5.5		0	48	108
-5.4		0	48	109
-5.3		0	49	111
-5.2		0	49	112
-5.1		0	49	113
-5		0	50	114
-4.9		0	50	112
-4.8		0	50	112
-4.7		0	50	111
-4.6		0	50	110
-4.5		0	50	110
-4.4		0	51	112
-4.3		0	52	111
-4.2		0	54	112
-4.1		0	54	113
-4		0	55	114
-3.9		0	57	115
-3.8		0	58	117
-3.7		0	58	117
-3.6		0	60	117
-3.5		0	59	116
-3.4		0	59	117
-3.3		0	59	118
-3.2		0	58	119
-3.1		0	59	118
-3		0	59	118
-2.9		0	60	117
-2.8		0	60	117
-2.7		0	62	115
-2.6		0	65	116
-2.5		0	67	118
-2.4		0	67	118
-2.3		0	69	118
-2.2		0	69	119
-2.1		0	69	119
-2		0	68	118
-1.9		0	68	118
-1.8		0	68	117
-1.7		0	68	119
-1.6		0	67	120
-1.5		1	68	120
-1.4		1	67	120
-1.3		1	67	120
-1.2		1	67	121
-1.1		1	69	121
-1		1	69	121
-0.9		1	69	121
-0.8		1	69	122
-0.7		1	69	122
-0.6		1	69	122
-0.5		1	69	121
-0.4		1	68	120
-0.3		1	68	120
-0.2		1	67	120
-0.1		1	66	117
0		1	63
0.1	0	1	64
0.2	0	1	65
0.3	0	1	65
0.4	0	1	65
0.5	0	1	65
0.6	0	1	64
0.7	0	1	64
0.8	0	1	65
0.9	0	1	67
1	0	1	68
1.1	0	1	67
1.2	0	1	66
1.3	0	1	66
1.4	0	1	66
1.5	0	1	66
1.6	0	1	66
1.7	0	1	66
1.8	0	1	66
1.9	0	1	69
2	0	1	68
2.1	0	1	68
2.2	0	1	69
2.3	0	1	70
2.4	0	1	71
2.5	0	1	72
2.6	0	1	72
2.7	0	1	72
2.8	0	1	71
2.9	0	1	70
3	0	1	70
3.1	0	1	71
3.2	0	1	72
3.3	0	1	73
3.4	0	1	73
3.5	0	1	73
3.6	0	1	74
3.7	0	1	75
3.8	0	1	75
3.9	0	1	76
4	0	1	77
4.1	0	1	79
4.2	0	1	80
4.3	0	1	80
4.4	0	1	79
4.5	0	1	81
4.6	0	1	81
4.7	0	1	81
4.8	0	1	82
4.9	0	1	82
5	0	1	82
5.1	0	1	83
5.2	0	1	83
5.3	0	1	83
5.4	0	1	83
5.5	0	1	83
5.6	0	1	84
5.7	0	1	84
5.8	0	1	82
5.9	0	2	82
6	0	2	82
6.1	0	2	81
6.2	0	2	82
6.3	0	2	83
6.4	0	1	83
6.5	0	1	83
6.6	0	1	83
6.7	0	1	83
6.8	0	1	82
6.9	0	1	81
7	0	1	82
7.1	0	1	81
7.2	0	1	81
7.3	0	1	81
7.4	0	1	80
7.5	0	1	79
7.6	0	1	79
7.7	0	1	79
7.8	0	1	80
7.9	0	1	79
8	0	1	79
8.1	0	1	79
8.2	0	1	79
8.3	0	1	80
8.4	0	1	79
8.5	0	1	78
8.6	0	1	79
8.7	0	1	79
8.8	0	1	79
8.9	0	1	80
9	0	1	81
9.1	0	1	81
9.2	0	1	80
9.3	0	1	81
9.4	0	1	82
9.5	0	1	83
9.6	0	1	82
9.7	0	1	83
9.8	0	1	83
9.9	0	1	83
10	0	1	83
10.1	0	1	82
10.2	0	1	82
10.3	0	1	82
10.4	0	1	82
10.5	0	2	81
10.6	0	2	80
10.7	0	2	80
10.8	0	2	82
10.9	0	2	83
11	0	2	83
11.1	0	2	83
11.2	0	2	83
11.3	0	2	83
11.4	0	2	83
11.5	0	2	83
11.6	0	2	83
11.7	0	2	82
11.8	0	2	82
11.9	0	2	82
12	0	2	82
12.1	0	2	82
12.2	0	1	82
12.3	0	1	81
12.4	0	1	81
12.5	0	1	81
12.6	0	1	81
12.7	0	1	81
12.8	0	1	81
12.9	0	1	81
13	0	1	84
13.1	0	1	85
13.2	0	1	84
13.3	0	1	84
13.4	0	1	83
13.5	0	1	84
13.6	0	1	84
13.7	0	2	83
13.8	0	2	83
13.9	0	2	83
14	0	2	83
14.1	0	2	83
14.2	0	2	83
14.3	0	2	83
14.4	0	2	84
14.5	0	2	85
14.6	0	2	85
14.7	0	2	85
14.8	0	2	85
14.9	0	2	85
15	0	2	85
15.1	0	2	85
15.2	0	2	85
15.3	0	2	85
15.4	0	2	87
15.5	0	2	87
15.6	0	2	87
15.7	0	2	88
15.8	0	2	88
15.9	0	2	89
16	0	2	89
16.1	0	2	87
16.2	0	2	88
16.3	0	2	89
16.4	0	2	91
16.5	0	2	91
16.6	0	2	91
16.7	0	2	91
16.8	0	2	92
16.9	0	2	93
17	0	2	92
17.1	0	2	93
17.2	0	2	92
17.3	0	2	90
17.4	0	2	90
17.5	0	2	91
17.6	0	2	94
17.7	0	2	94
17.8	0	2	94
17.9	0	2	94
18	0	2	93
18.1	0	2	93
18.2	0	2	93
18.3	0	2	92
18.4	0	2	92
18.5	0	2	93
18.6	0	2	95
18.7	0	2	94
18.8	0	2	96
18.9	0	2	96
19	0	2	97
19.1	0	2	98
19.2	0	2	98
19.3	0	2	98
19.4	0	2	99
19.5	0	2	101
19.6	0	2	101
19.7	0	2	101
19.8	0	2	101
19.9	0	1	101
20	0	1	101
20.1	0	1	101
20.2	0	1	101
20.3	0	1	102
20.4	0	1	102
20.5	0	1	102
20.6	0	1	101
20.7	0	1	101
20.8	0	1	101
20.9	0	1	101
21	0	1	101
21.1	0	1	101
21.2	0	1	101
21.3	0	1	102
21.4	0	1	101
21.5	0	1	100
21.6	0	1	101
21.7	0	1	101
21.8	0	1	100
21.9	0	1	98
22	0	1	99
22.1	0	1	99
22.2	0	1	98
22.3	0	1	97
22.4	0	1	97
22.5	0	1	97
22.6	0	1	97
22.7	0	1	97
22.8	0	1	97
22.9	0	1	97
23	0	1	98
23.1	0	1	99
23.2	0	1	100
23.3	0	1	100
23.4	0	1	99
23.5	0	1	101
23.6	0	1	101
23.7	0	1	102
23.8	0	1	102
23.9	0	1	102
24	0	1	102
24.1	0	2	102
24.2	0	2	101
24.3	0	2	101
24.4	0	2	101
24.5	0	2	101
24.6	0	2	101
24.7	0	2	101
24.8	0	2	102
24.9	0	2	104
25	0	2	103
25.1	0	2	103
25.2	0	2	102
25.3	0	2	102
25.4	0	2	102
25.5	0	2	102
25.6	0	2	102
25.7	0	2	102
25.8	0	2	104
25.9	0	2	104
26	0	2	104
26.1	0	2	105
26.2	0	2	106
26.3	0	2	106
26.4	0	2	104
26.5	0	2	104
26.6	0	2	103
26.7	0	2	103
26.8	0	2	103
26.9	0	2	103
27	0	2	103
27.1	0	2	104
27.2	0	2	104
27.3	0	2	105
27.4	0	2	104
27.5	0	2	104
27.6	0	2	103
27.7	0	2	102
27.8	0	2	102
27.9	0	2	102
28	0	2	103
28.1	0	2	103
28.2	0	2	103
28.3	0	2	103
28.4	0	2	102
28.5	0	2	102
28.6	0	2	102
28.7	0	2	102
28.8	0	2	102
28.9	0	2	102
29	0	2	102
29.1	0	2	103
29.2	0	2	102
29.3	0	2	102
29.4	0	2	103
29.5	0	2	102
29.6	0	2	102
29.7	0	2	101
29.8	0	2	101
29.9	0	2	101
30	0	2	101
30.1	0	2	101
30.2	0	2	102
30.3	0	2	102
30.4	0	2	102
30.5	0	2	102
30.6	0	2	103
30.7	0	2	103
30.8	0	2	103
30.9	0	2	103
31	0	2	103
31.1	0	2	104
31.2	0	2	104
31.3	0	2	105
31.4	0	2	105
31.5	0	2	105
31.6	0	2	105
31.7	0	2	105
31.8	0	2	105
31.9	0	2	105
32	0	2	105
32.1	0	3	105
32.2	0	3	104
32.3	0	3	104
32.4	0	2	104
32.5	0	2	104
32.6	0	2	102
32.7	0	2	101
32.8	0	2	102
32.9	0	2	102
33	0	2	102
33.1	0	2	102
33.2	0	2	102
33.3	0	2	102
33.4	0	2	102
33.5	0	2	102
33.6	0	2	102
33.7	0	2	103
33.8	0	2	101
33.9	0	2	103
34	0	2	103
34.1	0	2	103
34.2	0	2	103
34.3	0	2	102
34.4	0	2	102
34.5	0	2	103
34.6	0	2	103
34.7	0	2	103
34.8	0	2	103
34.9	0	2	104
35	0	2	104
35.1	0	2	104
35.2	0	2	104
35.3	0	2	104
35.4	0	2	104
35.5	0	2	104
35.6	0	2	106
35.7	0	2	106
35.8	0	2	106
35.9	0	2	105
36	0	2	105
36.1	0	2	105
36.2	0	2	105
36.3	0	2	105
36.4	0	2	104
36.5	0	2	104
36.6	0	2	104
36.7	0	2	104
36.8	0	2	103
36.9	0	2	103
37	0	2	102
37.1	0	2	102
37.2	0	2	102
37.3	0	2	102
37.4	0	2	103
37.5	0	2	102
37.6	0	2	101
37.7	0	2	101
37.8	0	2	101
37.9	0	2	101
38	0	2	101
38.1	0	2	101
38.2	0	2	100
38.3	0	2	100
38.4	0	2	100
38.5	0	2	100
38.6	0	2	101
38.7	0	2	100
38.8	0	2	100
38.9	0	2	100
39	0	2	100
39.1	0	2	100
39.2	0	2	100
39.3	0	2	100
39.4	0	2	100
39.5	0	2	100
39.6	0	2	100
39.7	0	2	100
39.8	0	2	100
39.9	0	2	100
40	0	2	99
40.1	0	2	99
40.2	0	2	99
40.3	0	2	99
40.4	0	2	100
40.5	0	2	100
40.6	0	2	100
40.7	0	2	101
40.8	0	2	101
40.9	0	2	101
41	0	2	101
41.1	0	3	101
41.2	0	3	101
41.3	0	3	101
41.4	0	3	101
41.5	0	3	99
41.6	0	3	99
41.7	0	3	99
41.8	0	3	98
41.9	0	3	98
42	0	3	97
42.1	0	3	97
42.2	0	2	97
42.3	0	2	97
42.4	0	2	97
42.5	0	2	97
42.6	0	2	97
42.7	0	2	97
42.8	0	2	98
42.9	0	2	98
43	0	2	98
43.1	0	2	99
43.2	0	2	99
43.3	0	2	99
43.4	0	2	100
43.5	0	2	100
43.6	0	2	101
43.7	0	2	101
43.8	0	2	101
43.9	0	2	101
44	0	2	101
44.1	0	2	102
44.2	0	2	101
44.3	0	2	101
44.4	0	2	101
44.5	0	2	101
44.6	0	2	102
44.7	0	2	102
44.8	0	2	102
44.9	0	2	102
45	0	2	102
45.1	0	2	102
45.2	0	2	102
45.3	0	2	102
45.4	0	2	101
45.5	0	2	101
45.6	0	2	103
45.7	0	2	103
45.8	0	2	103
45.9	0	2	103
46	0	2	103
46.1	0	2	103
46.2	0	2	102
46.3	0	2	102
46.4	0	2	101
46.5	0	2	101
46.6	0	2	101
46.7	0	2	101
46.8	0	2	101
46.9	0	2	101
47	0	2	100
47.1	0	2	101
47.2	0	2	101
47.3	0	2	101
47.4	0	2	101
47.5	0	2	101
47.6	0	2	100
47.7	0	2	100
47.8	0	2	100
47.9	0	2	100
48	0	2	100
48.1	0	2	100
48.2	0	2	100
48.3	0	2	100
48.4	0	2	100
48.5	0	2	100
48.6	0	2	100
48.7	0	2	100
48.8	0	3	101
48.9	0	3	101
49	0	3	101
49.1	0	2	101
49.2	0	2	101
49.3	0	3	101
49.4	0	3	101
49.5	0	3	101
49.6	0	3	100
49.7	0	3	100
49.8	0	3	100
49.9	0	3	100
50	0	3	100
50.1	0	3	99
50.2	0	3	100
50.3	0	3	100
50.4	0	3	101
50.5	0	3	101
50.6	0	3	101
50.7	0	3	101
50.8	0	4	100
50.9	0	4	100
51	0	4	100
51.1	0	4	100
51.2	0	4	99
51.3	0	4	99
51.4	0	4	98
51.5	0	3	98
51.6	0	3	98
51.7	0	3	98
51.8	0	3	98
51.9	0	3	99
52	0	3	100
52.1	0	3	100
52.2	0	3	101
52.3	0	3	101
52.4	0	3	101
52.5	0	3	101
52.6	0	3	102
52.7	0	3	102
52.8	0	3	102
52.9	0	3	102
53	0	3	102
53.1	0	3	103
53.2	0	5	103
53.3	0	5	103
53.4	0	5	103
53.5	0	5	104
53.6	0	5	104
53.7	0	5	105
53.8	0	5	106
53.9	0	5	106
54	0	5	107
54.1	0	4	107
54.2	0	4	106
54.3	0	4	106
54.4	0	4	106
54.5	0	4	106
54.6	0	4	106
54.7	0	4	106
54.8	0	4	107
54.9	0	4	107
55	0	4	107
55.1	0	4	107
55.2	0	4	105
55.3	0	4	104
55.4	0	5	105
55.5	0	5	105
55.6	0	5	105
55.7	0	5	105
55.8	0	5	105
55.9	0	5	104
56	0	5	105
56.1	0	5	106
56.2	0	5	106
56.3	0	5	106
56.4	0	5	105
56.5	0	5	106
56.6	0	5	106
56.7	0	5	106
56.8	0	5	106
56.9	0	5	106
57	0	5	106
57.1	0	5	106
57.2	0	5	106
57.3	0	5	106
57.4	0	5	107
57.5	0	5	107
57.6	0	5	107
57.7	0	5	107
57.8	0	5	108
57.9	0	6	107
58	0	6	107
58.1	0	6	107
58.2	0	6	107
58.3	0	6	106
58.4	0	5	106
58.5	0	5	106
58.6	0	5	107
58.7	0	5	108
58.8	0	4	108
58.9	0	4	107
59	0	4	107
59.1	0	4	106
59.2	0	4	105
59.3	0	4	105
59.4	0	4	106
59.5	0	4	106
59.6	0	4	106
59.7	0	4	105
59.8	0	5	106
59.9	0	5	106
60	0	5	106
